# Supplementary material for: Organocatalytic asymmetric Michael addition of unprotected 3-substituted oxindoles to 1,4-naphthoquinone
Source: publisher site journal article supplement (doi:10.3762/bjoc.8.157), 2012-08-23
Supplement: Additional file 1 [file 1860-5397-8-157-S1.pdf]

**Supporting Information**  
**for**  
**Organocatalytic asymmetric Michael addition of**  
**unprotected 3-substituted oxindoles to**  
**1,4-naphthoquinone**

Jin-Sheng Yu, Feng Zhou, Yun-Lin Liu and Jian Zhou\*

Address: Shanghai Key Laboratory of Green Chemistry and Chemical Processes,  
Department of Chemistry, East China Normal University, 3663 N. Zhongshan Road,  
Shanghai, 200062 (P. R. China)

Email: Jian Zhou\* - [jzhou@chem.ecnu.edu.cn](mailto:jzhou@chem.ecnu.edu.cn)

\* Corresponding author

**General experimental procedures and compound characterization**

**Table of contents**

|                                                                            |    |
|----------------------------------------------------------------------------|----|
| General information .....                                                  | 2  |
| Experimental data .....                                                    | 3  |
| Determination of absolute configuration .....                              | 11 |
| Reference .....                                                            | 12 |
| <sup>1</sup> H, <sup>13</sup> C, <sup>19</sup> F NMR and HPLC spectra..... | 13 |

## General information

Reactions were monitored by thin layer chromatography (TLC) using UV light to visualize the course of reaction. Purification of reaction products was carried out by flash chromatography on silica gel. Chemical yields refer to pure isolated substances. The  $[\alpha]_D$  was recorded using PolAAr 3005 High Accuracy Polarimeter. Infrared (IR) spectra were obtained using a Bruker tensor 27 infrared spectrometer.  $^1\text{H}$  and  $^{13}\text{C}$  NMR spectra were obtained using a Bruker DPX-400 spectrometer. Chemical shifts are reported in ppm from tetramethylsilane with the solvent resonance as the internal standard. The following abbreviations were used to designate chemical shift multiplicities: s = singlet, d = doublet, t = triplet, q = quartet, h = heptet, m = multiplet, br = broad.

All reactions were carried out in air except noted. Anhydrous ethyl acetate was prepared by distillation over activated calcium sulfate and 5 Å MS prior to use. The chiral catalyst (DHQD)<sub>2</sub>PYR and 1,4-naphthoquinone were commercially available. 3-Substituted oxindoles **1** [1] were prepared from the corresponding isatins according to literature reports.

## Experimental data

### General procedure for the Michael addition of unprotected 3-substituted oxindoles **1** and 1,4-naphthoquinone (**2**).

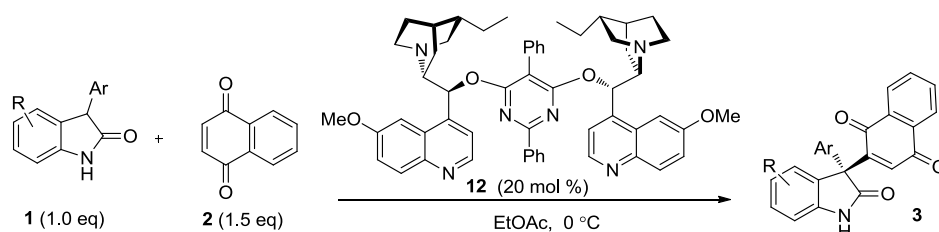

To a 10 mL vial were added catalyst **12** (44.0 mg, 0.05 mmol) and 3-substituted oxindoles **1** (0.25 mmol) followed by 5 mL of anhydrous ethyl acetate. The reaction mixture was stirred vigorously at room temperature until the full dissolution of catalyst **12**. The resulting mixture was stirred at 0 °C for about 20 min before 1,4-naphthoquinone (**2**, 59.3 mg, 0.375 mmol) was added. After completion of the reaction (TLC analysis), the solvent was carefully removed under reduced pressure. The residue was directly subjected to column chromatography to afford the desired product **3**, using CH<sub>2</sub>Cl<sub>2</sub>/acetone (from 150:1 to 100:1 ) as eluent.

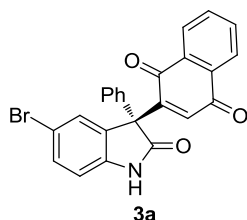

Product **3a** was obtained in 70% yield as yellow solid; mp 192-194 °C; HPLC analysis (Chiralcel OD-H, iPrOH/hexane 20/80, 1.0 mL/min, 230 nm;  $t_r$  (minor) = 8.76 min,  $t_r$  (major) = 25.17 min) gave the product: 79% ee;  $[\alpha]_D^{25} = +198.1$  ( $c = 0.96$ , acetone); <sup>1</sup>H NMR (400 MHz, CDCl<sub>3</sub>): δ 8.07-8.05 (m, 1H), 8.00-7.98 (m, 1H), 7.82 (s, 1H), 7.77-7.71 (m, 2H), 7.45-7.43 (m, 3H), 7.39-7.37 (m, 3H), 7.28 (d,  $J = 1.6$  Hz, 1H), 6.90 (d,  $J = 8.4$  Hz, 1H), 6.65 (s, 1H); <sup>13</sup>C NMR (100 MHz, CDCl<sub>3</sub>): δ 184.66, 183.48, 178.45, 151.95, 140.55, 138.99, 135.01, 134.18, 134.09, 132.53, 132.09, 131.74, 128.96, 128.72, 128.61, 128.46, 127.18, 126.27, 114.63, 112.20, 59.77; IR (ATR): 3165, 1708, 1664, 1617, 1473, 1297, 1252, 1001, 779, 705; MS (EI): 445 [ $M(^{81}\text{Br})^+$ , 76], 443 [ $M(^{79}\text{Br})^+$ , 77], 444 [ $(M + H)^+$ , 26], 398, 400 (88, 100), 364 (9), 319 (20), 278 (31), 203 (26), 105 (26), 76 (51); HRMS (EI): Exact mass calcd for C<sub>24</sub>H<sub>14</sub>NO<sub>3</sub><sup>79</sup>Br [ $M$ ]<sup>+</sup>: 443.0157, found: 443.0155.

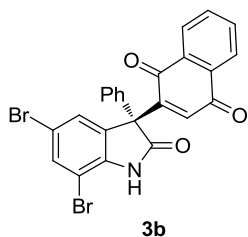

Product **3b** was obtained in 97% yield as yellow solid; mp 283-285 °C; HPLC analysis (Chiralcel OD-H, iPrOH/hexane 20/80, 1.0 mL/min, 230 nm;  $t_r$  (minor) = 7.42 min,  $t_r$  (major) = 17.95 min) gave the product: 80% ee;  $[\alpha]_D^{25} = +148.0$  ( $c = 0.80$ , acetone);  $^1\text{H}$  NMR (400 MHz,  $\text{CDCl}_3$ ):  $\delta$  8.07-8.05 (m, 1H), 8.01-7.98 (m, 1H), 7.82 (s, 1H), 7.78-7.71 (m, 2H), 7.61 (d,  $J = 2.0$  Hz, 1H), 7.42-7.39 (m, 5H), 7.22 (d,  $J = 1.6$  Hz, 1H), 6.62 (s, 1H);  $^{13}\text{C}$  NMR (100 MHz,  $\text{CDCl}_3$ ):  $\delta$  184.59, 183.40, 176.84, 151.64, 140.19, 139.15, 134.35, 134.31, 134.25, 134.17, 133.02, 131.79, 131.76, 129.14, 129.03, 128.58, 127.39, 127.25, 126.39, 114.80, 104.13, 60.85; IR (ATR): 3670, 2988, 2902, 1715, 1665, 1611, 1462, 1257, 1067, 801, 749; MS (EI): 523  $[\text{M}(^{79}\text{Br}^{81}\text{Br})^+]$ , 521  $[\text{M}(^{79}\text{Br}_2)^+]$ , 526  $[(\text{M} + \text{H})^+]$ , 478 (100), 462 (17), 367 (23), 277 (23), 202 (32), 104 (34), 76 (68); HRMS (EI): Exact mass calcd for  $\text{C}_{24}\text{H}_{13}\text{NO}_3^{79}\text{Br}_2$   $[\text{M}]^+$ : 520.9262, found: 520.9257.

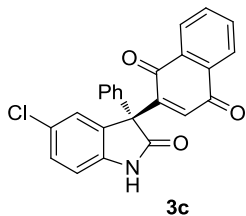

Product **3c** was obtained in 74% yield as yellow solid; mp 175-177 °C; HPLC analysis (Chiralcel OD-H, iPrOH/hexane 20/80, 1.0 mL/min, 254 nm;  $t_r$  (minor) = 8.32 min,  $t_r$  (major) = 24.42 min) gave the product: 81% ee;  $[\alpha]_D^{25} = +173.8$  ( $c = 0.51$ , acetone);  $^1\text{H}$  NMR (400 MHz,  $\text{CDCl}_3$ ):  $\delta$  8.09-7.97 (m, 3H), 7.77-7.71 (m, 2H), 7.45-7.44 (m, 2H), 7.41-7.37 (m, 3H), 7.29 (dd,  $J = 8.4$  Hz,  $J = 2.0$  Hz, 1H), 7.15 (d,  $J = 2.0$  Hz, 1H), 6.94 (dd,  $J = 8.4$ ,  $J = 4.4$ , 1H), 6.66 (s, 1H);  $^{13}\text{C}$  NMR (100 MHz,  $\text{CDCl}_3$ ):  $\delta$  184.67, 183.46, 178.83, 151.88, 140.14, 138.94, 135.01, 134.15, 134.07, 132.09, 131.67, 129.15, 128.91, 128.67, 128.56, 127.34, 127.14, 126.23, 125.68, 111.82, 59.87; IR (ATR): 3012, 1717, 1665, 1616, 1478, 1301, 1255, 999, 817, 730; MS (EI): 401  $[\text{M}(^{37}\text{Cl})^+]$ , 26], 399  $[\text{M}(^{35}\text{Cl})^+]$ , 69], 400  $[(\text{M} + \text{H})^+]$ , 20], 382 (22), 354, 356 (100, 44), 338 (15), 278 (15), 203 (13), 104 (11), 76 (25); HRMS (EI): Exact mass calcd for  $\text{C}_{24}\text{H}_{14}\text{NO}_3^{35}\text{Cl}$   $[\text{M}]^+$ : 399.0662, found: 399.0664.

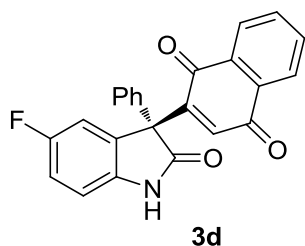

Product **3d** was obtained in 71% yield as yellow solid; mp 245-247 °C; HPLC analysis (Chiralcel OD-H, iPrOH/hexane = 20/80, 1.0 mL/min, 230 nm;  $t_r$  (minor) = 8.79 min,  $t_r$  (major) = 25.82 min) gave the product: 79% ee;  $[\alpha]_D^{25}$  = +191.9 ( $c$  = 0.61, acetone);  $^1\text{H}$  NMR (400 MHz,  $\text{CDCl}_3$ ):  $\delta$  8.07-8.04 (m, 1H), 8.00-7.97 (m, 1H), 7.76-7.70 (m, 3H), 7.46-7.45 (m, 2H), 7.39-7.36 (m, 3H), 7.03 (td,  $J$  = 8.8 Hz,  $J$  = 2.4 Hz, 1H), 6.96-6.93 (m, 2H), 6.67 (s, 1H);  $^{13}\text{C}$  NMR (100 MHz,  $\text{CDCl}_3$ ):  $\delta$  184.70, 183.46, 178.99, 159.71, 157.31, 151.87, 138.87, 135.24, 134.13, 134.07, 131.88, 131.68, 128.89, 128.60, 128.50, 127.13, 126.22, 115.70, 115.47, 113.60, 113.35, 111.44, 111.36, 60.20;  $^{19}\text{F}$  NMR (376 MHz,  $\text{CDCl}_3$ ):  $\delta$  -120.01 (s, 1F); IR (ATR): 3375, 3289, 3006, 1740, 1658, 1613, 1483, 1252, 999, 699; GC-MS: 383 ( $\text{M}^+$ , 46), 354 (13), 338 (100), 322 (23), 309 (19), 296(10), 105 (13), 76 (19); HRMS (EI): Exact mass calcd for  $\text{C}_{24}\text{H}_{14}\text{NO}_3\text{F}$  [ $\text{M}$ ] $^+$ : 383.0958, found: 383.0955.

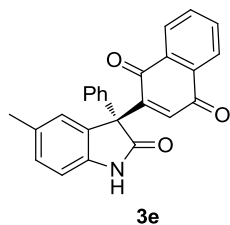

Product **3e** was obtained in 46% yield as yellow solid; mp 173-175 °C; HPLC analysis (Chiralcel OD-H, iPrOH/hexane 20/80, 1.0 mL/min, 230 nm;  $t_r$  (minor) = 8.92 min,  $t_r$  (major) = 20.84 min) gave the product: 69% ee;  $[\alpha]_D^{25}$  = +161.8 ( $c$  = 0.91, acetone);  $^1\text{H}$  NMR (400 MHz,  $\text{CDCl}_3$ ):  $\delta$  8.06-8.04 (m, 1H), 8.00-7.98 (m, 1H), 7.75-7.69 (m, 2H), 7.52-7.46 (m, 3H), 7.37-7.35 (m, 3H), 7.12 (d,  $J$  = 8.0 Hz, 1H), 6.97 (s, 1H), 6.90 (d,  $J$  = 8.0 Hz, 1H), 6.66 (s, 1H), 2.32 (s, 3H);  $^{13}\text{C}$  NMR (100 MHz,  $\text{CDCl}_3$ ):  $\delta$  184.95, 183.46, 178.96, 152.63, 138.95, 138.52, 135.97, 133.94, 133.93, 132.02, 131.71, 131.56, 130.40, 129.54, 128.74, 128.71, 128.35, 127.18, 126.19, 126.09, 110.47, 59.86, 21.14; IR (ATR): 3649, 2996, 2957, 1703, 1665, 1623, 1490, 1255, 894, 703; GC-MS: 379 ( $\text{M}^+$ , 68), 362 (30), 334 (100), 318 (21), 246 (30), 189 (14), 105 (10), 76 (12); HRMS (EI): Exact mass calcd for  $\text{C}_{25}\text{H}_{17}\text{NO}_3$  [ $\text{M}$ ] $^+$ : 379.1208, found: 379.1211.

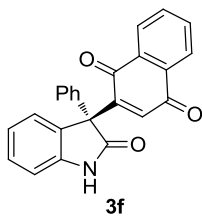

Product **3f** was obtained in 51% yield as yellow solid; mp 286-288 °C; HPLC analysis (Chiralcel OD-H, iPrOH/hexane 20/80, 1.0 mL/min, 230 nm;  $t_r$  (minor) = 9.83 min,  $t_r$  (major) = 29.17 min) gave the product: 70% ee;  $[\alpha]_D^{25} = +193.1$  ( $c = 0.52$ , acetone);  $^1\text{H}$  NMR (400 MHz,  $\text{CDCl}_3$ ):  $\delta$  8.05-8.04 (m, 1H), 7.99-7.97 (m, 1H), 7.75-7.68 (m, 2H), 7.53 (s, 1H), 7.47-7.46 (m, 2H), 7.36-7.31 (m, 4H), 7.18 (d,  $J = 7.6$  Hz, 1H), 7.07 (t,  $J = 7.6$  Hz, 1H), 7.01 (d,  $J = 7.6$  Hz, 1H), 6.67 (s, 1H);  $^{13}\text{C}$  NMR (100 MHz,  $\text{CDCl}_3$ ):  $\delta$  184.89, 183.50, 178.54, 152.58, 141.27, 138.65, 135.72, 134.01, 132.00, 131.74, 130.42, 129.23, 128.81, 128.78, 128.50, 127.15, 126.16, 125.61, 122.17, 110.58, 59.64; IR (ATR): 3664, 2989, 2959, 1712, 1664, 1615, 1472, 1254, 896, 755; GC-MS: 365 ( $\text{M}^+$ , 50), 320 (100), 291 (19), 246 (18), 207 (24), 105 (12), 76 (18), 44 (49); HRMS (EI): Exact mass calcd for  $\text{C}_{24}\text{H}_{15}\text{NO}_3$   $[\text{M}]^+$ : 365.1052, found: 365.1051.

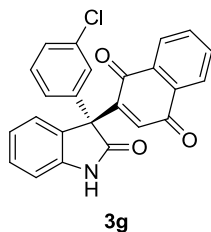

Product **3g** was obtained in 76% yield as yellow solid; mp 164-166 °C; HPLC analysis (Chiralcel OD-H, iPrOH/hexane 20/80, 1.0 mL/min, 254 nm;  $t_r$  (minor) = 9.55 min,  $t_r$  (major) = 20.01 min) gave the product: 81% ee;  $[\alpha]_D^{25} = +232.7$  ( $c = 0.50$ , acetone);  $^1\text{H}$  NMR (400 MHz,  $\text{CDCl}_3$ ):  $\delta$  8.08-8.04 (m, 2H), 7.98-7.96 (m, 1H), 7.75-7.69 (m, 2H), 7.42 (s, 2H), 7.35-7.29 (m, 3H), 7.18 (d,  $J = 7.2$  Hz, 1H), 7.08 (t,  $J = 7.2$  Hz, 1H), 7.02 (d,  $J = 7.6$  Hz, 1H), 6.67 (s, 1H);  $^{13}\text{C}$  NMR (100 MHz,  $\text{CDCl}_3$ ):  $\delta$  184.69, 183.30, 178.04, 151.94, 141.26, 138.49, 137.97, 134.77, 134.14, 134.10, 131.91, 131.69, 130.00, 129.65, 129.56, 128.78, 127.17, 127.08, 126.23, 125.64, 122.47, 110.83, 59.37; IR (ATR): 3700, 2918, 1711, 1664, 1616, 1473, 1257, 1099, 912, 783; GC-MS: 399 ( $\text{M}^+$ , 71), 355 (87), 319 (52), 290 (43), 207 (38), 105 (54), 76 (100), 44 (81); HRMS (EI): Exact mass calcd for  $\text{C}_{24}\text{H}_{14}\text{NO}_3^{35}\text{Cl}$   $[\text{M}]^+$ : 399.0662, found: 399.0645.

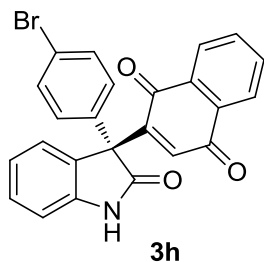

Product **3h** was obtained in 45% yield as yellow solid; mp 180-182 °C; HPLC analysis (Chiralcel OD-H, iPrOH/hexane 20/80, 1.0 mL/min, 230 nm;  $t_r$  (minor) = 10.58 min,  $t_r$  (major) = 25.61 min) gave the product: 54% ee;  $[\alpha]_{D=25}^{25} = +140.6$  ( $c = 0.67$ , acetone);  $^1\text{H}$  NMR (400 MHz,  $\text{CDCl}_3$ ):  $\delta$  8.61 (s, 1H), 8.05-8.03 (m, 1H), 7.98-7.94 (m, 1H), 7.74-7.68 (m, 2H), 7.50-7.46 (m, 2H), 7.34-7.28 (m, 3H), 7.16 (d,  $J = 7.6$  Hz, 1H), 7.06 (t,  $J = 7.6$  Hz, 1H), 7.02-6.99 (m, 1H), 6.67 (s, 1H);  $^{13}\text{C}$  NMR (100 MHz,  $\text{CDCl}_3$ ):  $\delta$  184.67, 183.31, 178.46, 151.90, 141.38, 138.43, 135.03, 134.10, 134.07, 131.90, 131.64, 130.40, 129.80, 129.45, 127.15, 126.19, 125.52, 122.33, 110.92, 59.35; IR (ATR): 3664, 2987, 2901, 1710, 1660, 1615, 1394, 1254, 1066, 895, 754; MS (EI): 445  $[\text{M}(^{81}\text{Br})^+]$ , 94], 443  $[\text{M}(^{79}\text{Br})^+]$ , 91], 444  $[(\text{M} + \text{H})^+]$ , 27], 400 (68), 364 (100), 319 (41), 290 (27), 278 (41), 203 (31), 105 (32), 76 (66); HRMS (EI): Exact mass calcd for  $\text{C}_{24}\text{H}_{14}\text{NO}_3^{79}\text{Br}$   $[\text{M}]^+$ : 443.0157, found: 443.0153.

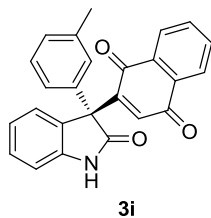

Product **3i** was obtained in 55% yield as yellow solid; mp 270-272 °C; HPLC analysis (Chiralcel OD-H, iPrOH/hexane 20/80, 1.0 mL/min, 230 nm;  $t_r$  (minor) = 7.79 min,  $t_r$  (major) = 16.93 min) gave the product: 83% ee;  $[\alpha]_{D=25}^{25} = +199.5$  ( $c = 0.42$ , acetone);  $^1\text{H}$  NMR (400 MHz,  $\text{CDCl}_3$ ):  $\delta$  8.06-8.03 (m, 1H), 7.99-7.96 (m, 1H), 7.80 (s, 1H), 7.73-7.69 (m, 2H), 7.33-7.29 (m, 2H), 7.23-7.22 (m, 2H), 7.18-7.14 (m, 2H), 7.06 (td,  $J = 7.6$  Hz,  $J = 1.2$  Hz, 1H), 7.00 (d,  $J = 8.0$  Hz, 1H), 6.69 (s, 1H), 2.32 (s, 3H);  $^{13}\text{C}$  NMR (100 MHz,  $\text{CDCl}_3$ ):  $\delta$  184.98, 183.51, 178.68, 152.65, 141.27, 138.70, 138.52, 135.54, 133.99, 132.01, 131.75, 130.56, 129.29, 129.14, 128.61, 127.14, 126.14, 125.80, 125.60, 122.11, 110.55, 59.59, 21.59; IR (ATR): 3240, 2927, 1717, 1663, 1595, 1472, 1256, 1000, 894, 748; GC-MS: 379 ( $\text{M}^+$ , 89), 361 (78), 281 (21), 254 (67), 226(100), 207 (51), 108 (39), 94 (45); HRMS (EI): Exact mass calcd for  $\text{C}_{25}\text{H}_{17}\text{NO}_3$   $[\text{M}]^+$ : 379.1208, found: 379.1204.

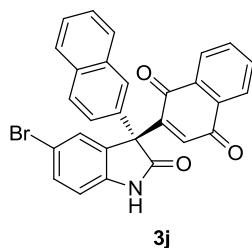

Product **3j** was obtained in 68% yield as yellow solid; mp 262-264 °C; HPLC analysis (Chiralcel OD-H, iPrOH/hexane 20/80, 1.0 mL/min, 254 nm;  $t_r$  (minor) = 11.35 min,  $t_r$  (major) = 36.45 min) gave the product: 77% ee;  $[\alpha]_D^{25} = +246.3$  ( $c = 0.97$ , acetone);  $^1\text{H}$  NMR (400 MHz,  $\text{CDCl}_3$ ):  $\delta$  8.07-8.04 (m, 1H), 8.01-7.98 (m, 1H), 7.91-7.84 (m, 3H), 7.78-7.70 (m, 4H), 7.67 (s, 1H), 7.55-7.47 (m, 3H), 7.37 (d,  $J = 1.6$  Hz, 1H), 6.93 (d,  $J = 8.0$  Hz, 1H), 6.65 (s, 1H);  $^{13}\text{C}$  NMR (100 MHz,  $\text{CDCl}_3$ ):  $\delta$  184.58, 183.47, 178.06, 151.86, 140.46, 139.09, 134.23, 134.12, 133.05, 132.91, 132.47, 132.38, 132.24, 131.86, 131.75, 128.94, 128.55, 128.30, 127.91, 127.56, 127.20, 126.97, 126.54, 126.30, 125.96, 114.77, 112.17, 59.78; IR (ATR): 3662, 2990, 1713, 1666, 1594, 1478, 1257, 1066, 900, 746; MS (EI): 495  $[\text{M}(^{81}\text{Br})^+]$ , 46], 493  $[\text{M}(^{79}\text{Br})^+]$ , 42], 494  $[(\text{M} + \text{H})^+]$ , 20], 448 (80), 450 (93), 328 (20), 258 (22), 207 (18), 105 (28), 76 (34), 44 (100); HRMS (EI): Exact mass calcd for  $\text{C}_{28}\text{H}_{16}\text{NO}_3^{79}\text{Br} [\text{M}]^+$ : 493.0314, found: 493.0323.

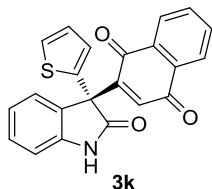

Product **3k** was obtained in 53% yield as yellow solid; mp 231-233 °C; HPLC analysis (Chiralcel OD-H, iPrOH/hexane 20/80, 1.0 mL/min, 254 nm;  $t_r$  (minor) = 9.79 min,  $t_r$  (major) = 26.09 min) gave the product: 65% ee;  $[\alpha]_D^{25} = +111.3$  ( $c = 0.51$ , acetone);  $^1\text{H}$  NMR (400 MHz,  $\text{CDCl}_3$ ):  $\delta$  8.07-8.05 (m, 1H), 7.97-7.95 (m, 1H), 7.77-7.68 (m, 3H), 7.36-7.31 (m, 2H), 7.23 (d,  $J = 7.6$  Hz, 1H), 7.19 (d,  $J = 2.8$  Hz, 1H), 7.07-7.00 (m, 3H), 6.81 (s, 1H);  $^{13}\text{C}$  NMR (100 MHz,  $\text{CDCl}_3$ ):  $\delta$  184.85, 183.20, 177.99, 151.69, 141.16, 138.58, 138.32, 134.07, 134.03, 131.84, 131.79, 131.57, 129.50, 128.64, 127.24, 127.14, 127.09, 126.21, 124.16, 122.23, 110.79, 56.88; IR (ATR): 3391, 3339, 2923, 1728, 1659, 1590, 1471, 1299, 890, 764; GC-MS: 371 ( $\text{M}^+$ , 35), 338 (100), 327 (28), 281 (26), 253 (19), 207 (59), 76 (33), 44 (94); HRMS (EI): Exact mass calcd for  $\text{C}_{22}\text{H}_{13}\text{NO}_3\text{S} [\text{M}]^+$ : 371.0616, found: 371.0612.



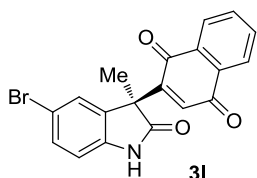

Product **3i** was obtained in 58% yield as yellow solid; mp 285-288 °C; HPLC analysis (Chiralcel OD-H, *i*PrOH/hexane = 20/80, 1.0 mL/min, 254 nm;  $t_r$  (minor) = 9.21 min,  $t_r$  (major) = 13.21 min) gave the product: 19% ee;

$[\alpha]_D^{25} = -5.227$  ( $c = 0.53$ , acetone);  $^1\text{H}$  NMR (400 MHz,  $\text{CDCl}_3$ ):  $\delta$  8.44 (s, 1H), 8.09 (d,  $J = 7.6$  Hz, 1H), 7.92 (d,  $J = 7.6$  Hz, 1H), 7.77-7.68 (m, 2H), 7.34 (dd,  $J = 8.0$  Hz,  $J = 2.0$  Hz, 1H), 7.21 (s, 1H), 7.05 (d,  $J = 1.2$  Hz, 1H), 6.88 (d,  $J = 8.0$  Hz, 1H), 1.66 (s, 3H);  $^{13}\text{C}$  NMR (100 MHz,  $\text{CDCl}_3$ ):  $\delta$  184.55, 183.35, 180.26, 149.28, 139.68, 136.77, 136.08, 134.18, 134.11, 131.79, 131.71, 131.40, 127.08, 126.29, 125.54, 114.92, 111.92, 50.50, 22.38; IR (ATR): 3387, 2999, 2951, 1735, 1662, 1586, 1475, 1290, 809, 748; GC-MS: 383  $[\text{M}(^{81}\text{Br})^+]$ , 20], 381  $[\text{M}(^{79}\text{Br})^+]$ , 21], 337 (100), 309 (57), 230 (58), 140 (20), 115 (57), 101 (76), 76 (71); HRMS (EI): Exact mass calcd for  $\text{C}_{19}\text{H}_{12}\text{NO}_3$   $^{79}\text{Br} [\text{M}]^+$ : 381.0001, found: 381.0003.

#### General procedure for the preparation of **13** from **3i**.

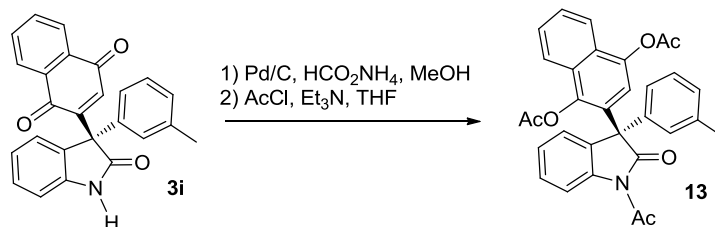

To a stirred solution of **3i** (27.5 mg, 0.072 mmol, 83% ee) and Pd/C (7.6 mg, 0.0072 mmol) in 1.0 mL MeOH was added  $\text{HCO}_2\text{NH}_4$  (45.4 mg, 0.72 mmol) at room temperature. The resulting mixture was stirred until complete disappearance of **3i** as indicated by TLC analysis. The Pd/C was filtered and the filtrate was concentrated under reduced pressure. Anhydrous THF was added (2.0 mL) to the residue, followed by  $\text{Et}_3\text{N}$  (100  $\mu\text{L}$ , 0.72 mmol) and  $\text{AcCl}$  (50  $\mu\text{L}$ , 0.72 mmol). The reaction mixture was stirred at room temperature till full conversion. Then, 2 mL saturated  $\text{NaHCO}_3$  (aq.) was added and extracted with ethyl acetate ( $3 \times 10$  mL). The organic phase was combined, dried and concentrated under reduced pressure. The residue was purified by silica gel column chromatography (petroleum ether/ethyl acetate 8/1) to afford the

desired product **13** (21.0 mg) in 57% yield for two steps as white solid. mp 144-146 °C; HPLC analysis (Chiralcel OZ-H, iPrOH/hexane 10/90, 1.0 mL/min, 230 nm;  $t_r$  (minor) = 14.13 min,  $t_r$  (major) = 28.49 min) gave the product: 84% ee;  $[\alpha]_D^{25} = +130.9$  ( $c = 1.00$ , acetone);  $^1\text{H}$  NMR (400 MHz,  $\text{CDCl}_3$ ):  $\delta$  8.35-8.33 (m, 1H), 7.85-7.83 (m, 1H), 7.54-7.38 (m, 5H), 7.25-7.19 (m, 4H), 7.09 (d,  $J = 7.6$  Hz, 1H), 6.92 (s, 1H), 2.71 (s, 3H), 2.39 (s, 3H), 2.33 (s, 3H), 1.97 (s, 3H);  $^{13}\text{C}$  NMR (100 MHz,  $\text{CDCl}_3$ ):  $\delta$  177.61, 171.33, 168.91, 167.13, 144.24, 142.61, 139.19, 138.56, 136.93, 130.47, 129.74, 129.35, 129.01, 128.60, 127.75, 127.28, 127.19, 127.13, 126.65, 125.65, 122.22, 121.60, 119.43, 116.55, 60.04, 26.65, 21.57, 20.96, 19.75; IR (ATR): 3073, 1768, 1711, 1601, 1463, 1368, 1273, 1183, 1160, 908, 756; MS (EI): 507 ( $\text{M}^+$ , 4), 508 [ $(\text{M} + \text{H})^+$ , 1], 465 (32), 423 (26), 381 (100), 336 (24), 319 (9), 202 (3), 105 (4), 43 (38); HRMS (EI): Exact mass calcd for  $\text{C}_{31}\text{H}_{25}\text{NO}_6$  [ $\text{M}]^+$ : 507.1682, found: 507.1679.

#### One-pot procedure for the synthesis of **13** from **1i** and **2**.

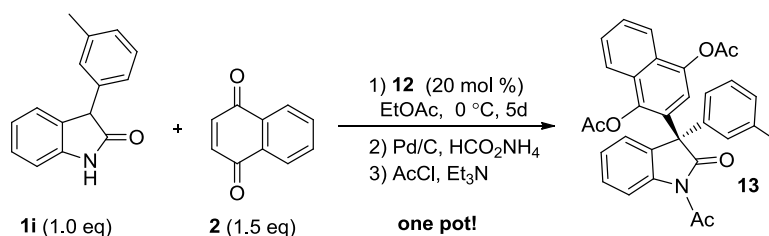

To a 25 mL Schlenk tube were added catalyst **12** (44.0 mg, 0.05 mmol) and 3-substituted oxindole **1i** (55.8 mg, 0.25 mmol), followed by 5 mL of anhydrous ethyl acetate under  $\text{N}_2$  atmosphere. The resulting mixture was stirred at 0 °C for about 20 min before 1,4-naphthoquinone (**2**, 59.3 mg, 0.375 mmol) was added. After disappearance of oxindole **1i** (TLC analysis), Pd/C (26.5 mg, 0.025 mmol) and  $\text{HCOONH}_4$  (157.5 mg, 2.5 mmol) were added and the reaction mixture was stirred at room temperature till full conversion. Then,  $\text{Et}_3\text{N}$  (0.35 mL, 2.5 mmol) and AcCl (179  $\mu\text{L}$ , 2.5 mmol) were added at room temperature. After the reaction was finished, the mixture was treated with 5 mL sat.  $\text{NaHCO}_3$ . Then, the Pd/C was filtered and the filtrate was extracted with ethyl acetate ( $3 \times 10$  mL). The organic phase was combined,

dried and concentrated under reduced pressure and the residue was purified by silica gel column chromatography (petroleum ether/ethyl acetate 8/1) to afford product **13** (63.4 mg) in 50% yield for one pot as white solid. HPLC analysis (Chiralcel OZ-H, iPrOH/hexane 10/90, 1.0 mL/min, 230 nm;  $t_r$  (minor) = 14.22 min,  $t_r$  (major) = 28.53 min) gave the isomeric composition of the product: 75% ee.

#### Determination of the absolute configuration.

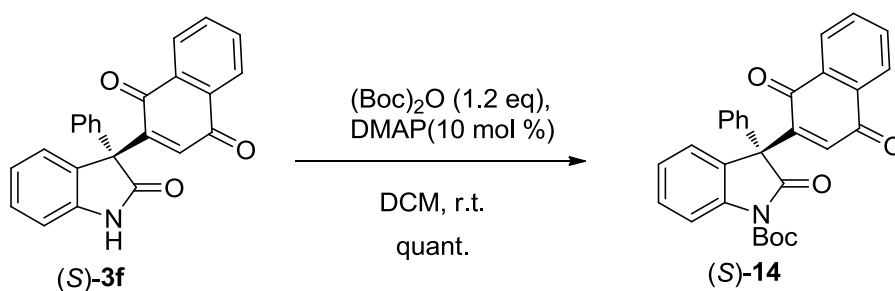

The absolute configuration of **3f** was assigned via transformation to the known compound **14**. To a 10 mL Schlenk tube were added **3f** (18.8 mg, 0.052 mmol, 70% ee) and DMAP (0.6 mg, 0.0052 mmol), followed by anhydrous  $\text{CH}_2\text{Cl}_2$  (1 mL) under  $\text{N}_2$  atmosphere. The resulting mixture was stirred at room temperature and di-*tert*-butyl dicarbonate (13.6 mg, 0.06 mmol) was added [2]. After consumption of **3f** (TLC analysis) the organic phase was directly charged on silica gel and subjected to FC, quantitatively obtaining the compound **14** as a yellow solid: 23.9 mg; HPLC analysis (Chiralcel IC, iPrOH/hexane 20/80, 1.0 mL/min, 254 nm;  $t_r$  (minor) = 7.11 min,  $t_r$  (major) = 9.01 min) gave the product: 69% ee;  $^1\text{H}$  NMR (400 MHz,  $\text{CDCl}_3$ ):  $\delta$  8.05-7.95 (m, 3H), 7.75-7.67 (m, 2H), 7.44-7.34 (m, 6H), 7.21-7.12 (m, 2H), 6.65 (s, 1H), 1.65 (s, 9H);  $^{13}\text{C}$  NMR (100 MHz,  $\text{CDCl}_3$ ):  $\delta$  184.79, 183.14, 174.70, 152.98, 149.27, 140.23, 138.59, 135.27, 134.10, 134.05, 131.79, 131.71, 129.43, 129.13, 128.90, 128.72, 128.42, 127.30, 126.20, 124.95, 124.01, 116.06, 84.48, 59.69, 28.11.  $[\alpha]_{\text{D}}^{25} = +75.0$  ( $c = 1.15$ ,  $\text{CH}_2\text{Cl}_2$ ); reported rotation for the known compound (*R*)-**14**  $[\alpha]_{\text{D}}^{25} = -113.7$  ( $c = 2.0$ ,  $\text{CH}_2\text{Cl}_2$ ) [3].

## References

1. Hamashima, Y.; Suzuki, T.; Takano, H.; Shimura, Y. ; Sodeoka, M. *J. Am. Chem. Soc.* **2005**, *127*, 10164.
2. Ding, M.; Zhou, F.; Qian, Z.-Q.; Zhou, J. *Org. Biomol. Chem.* **2010**, *8*, 2912.
3. Siau, W.-Y.; Li, W.; Xue, F.; Ren, Q.; Xu, M.; Sun, S.; Guo, H.; Jiang, X.; Wang, J. *Chem. Eur. J.* **2012**, DOI: 10.1002/chem.201200206.

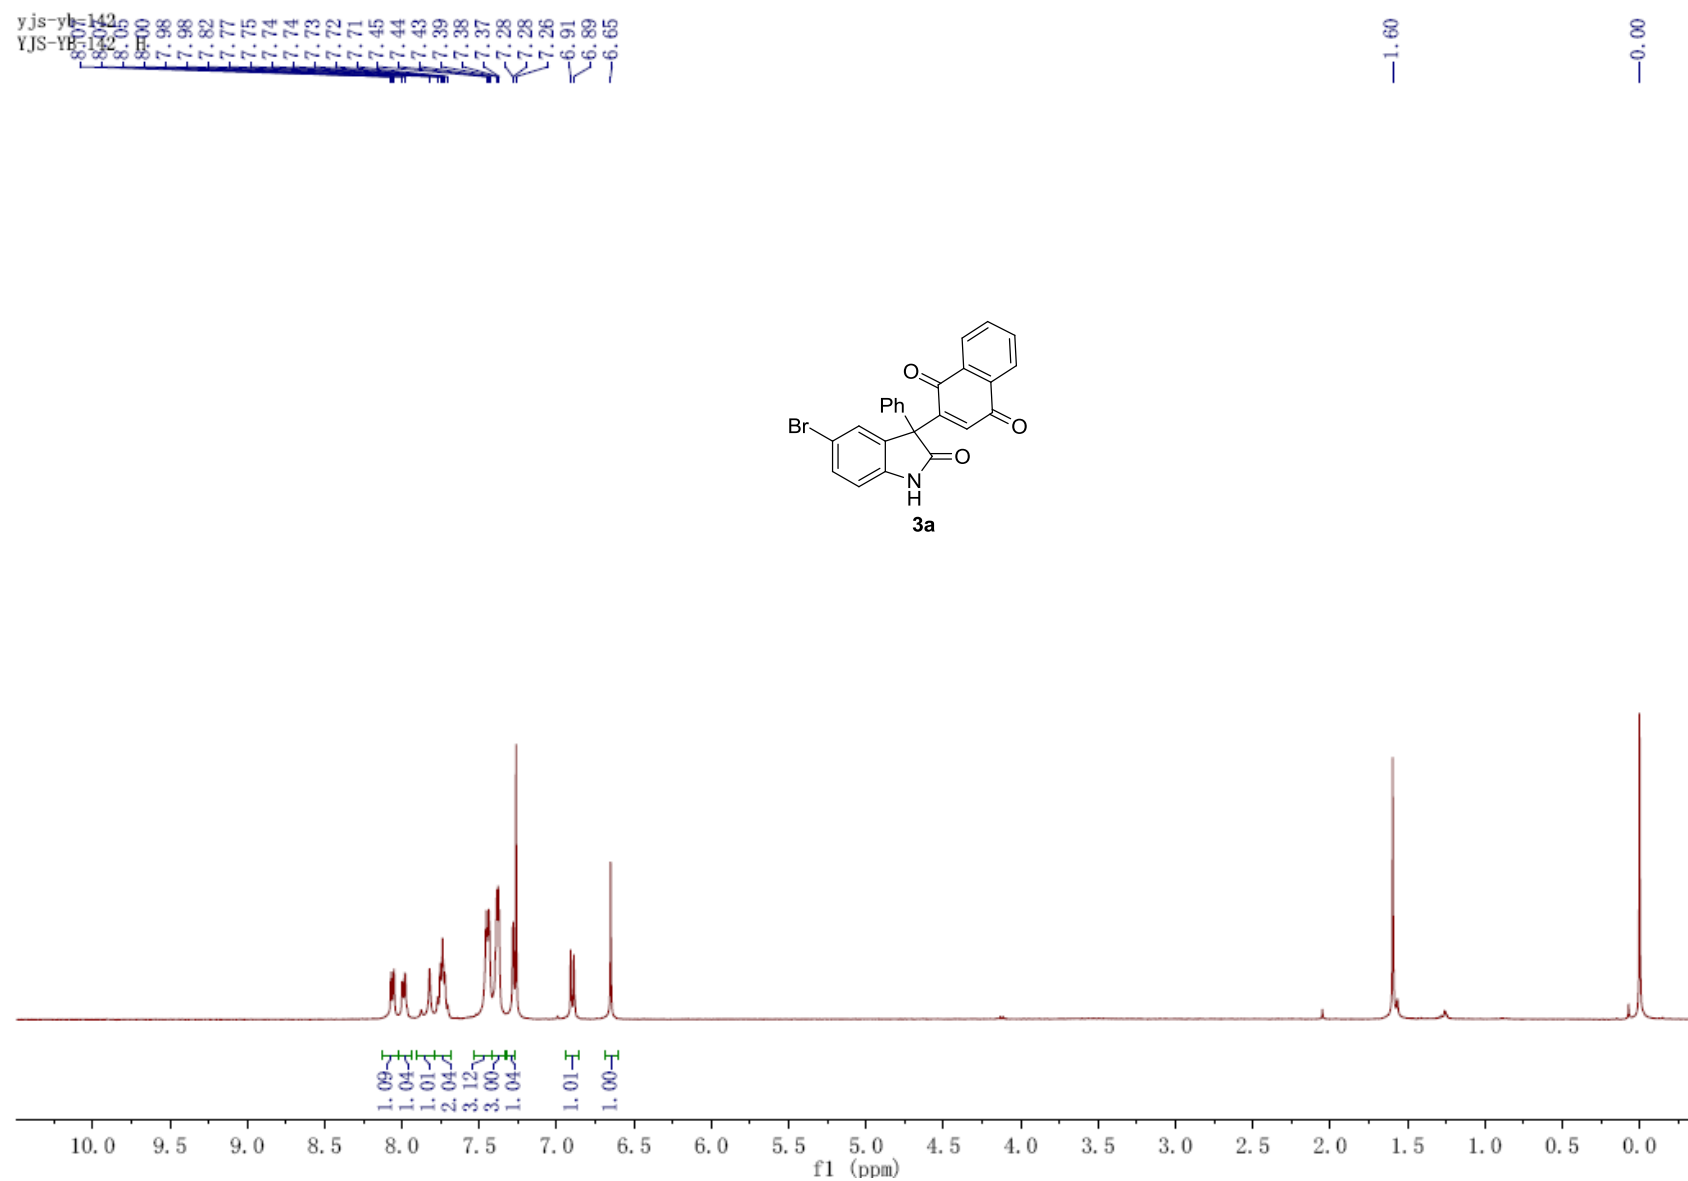

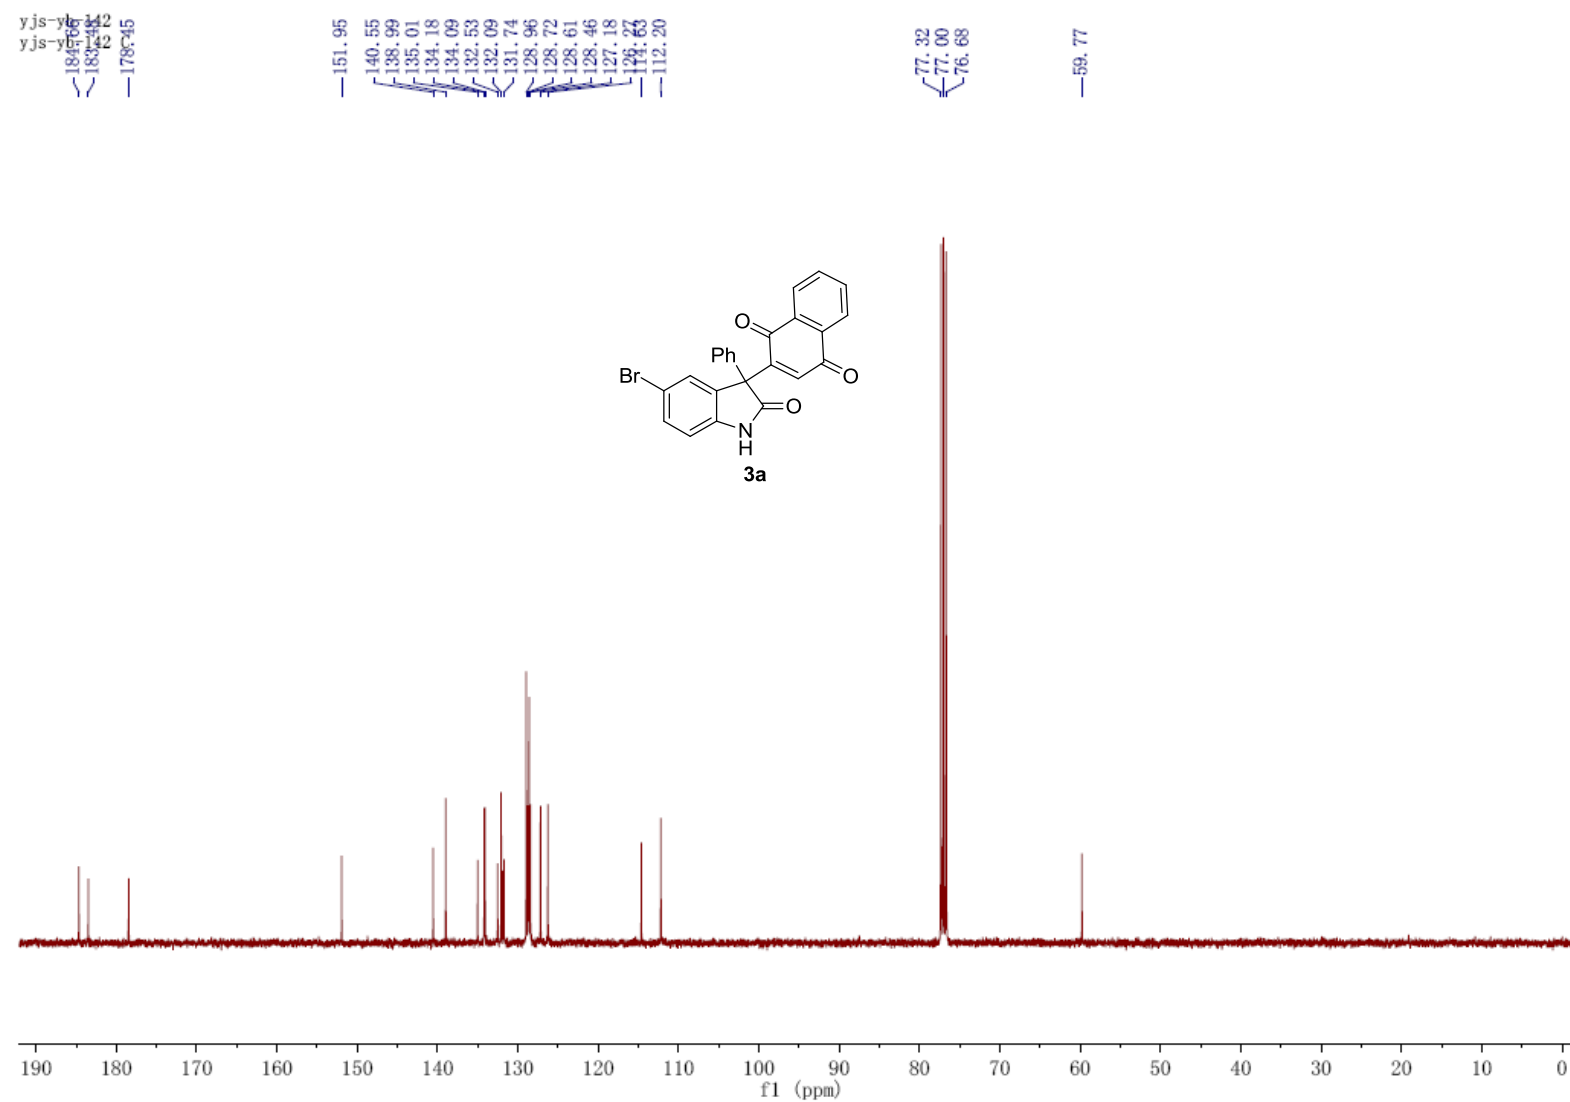

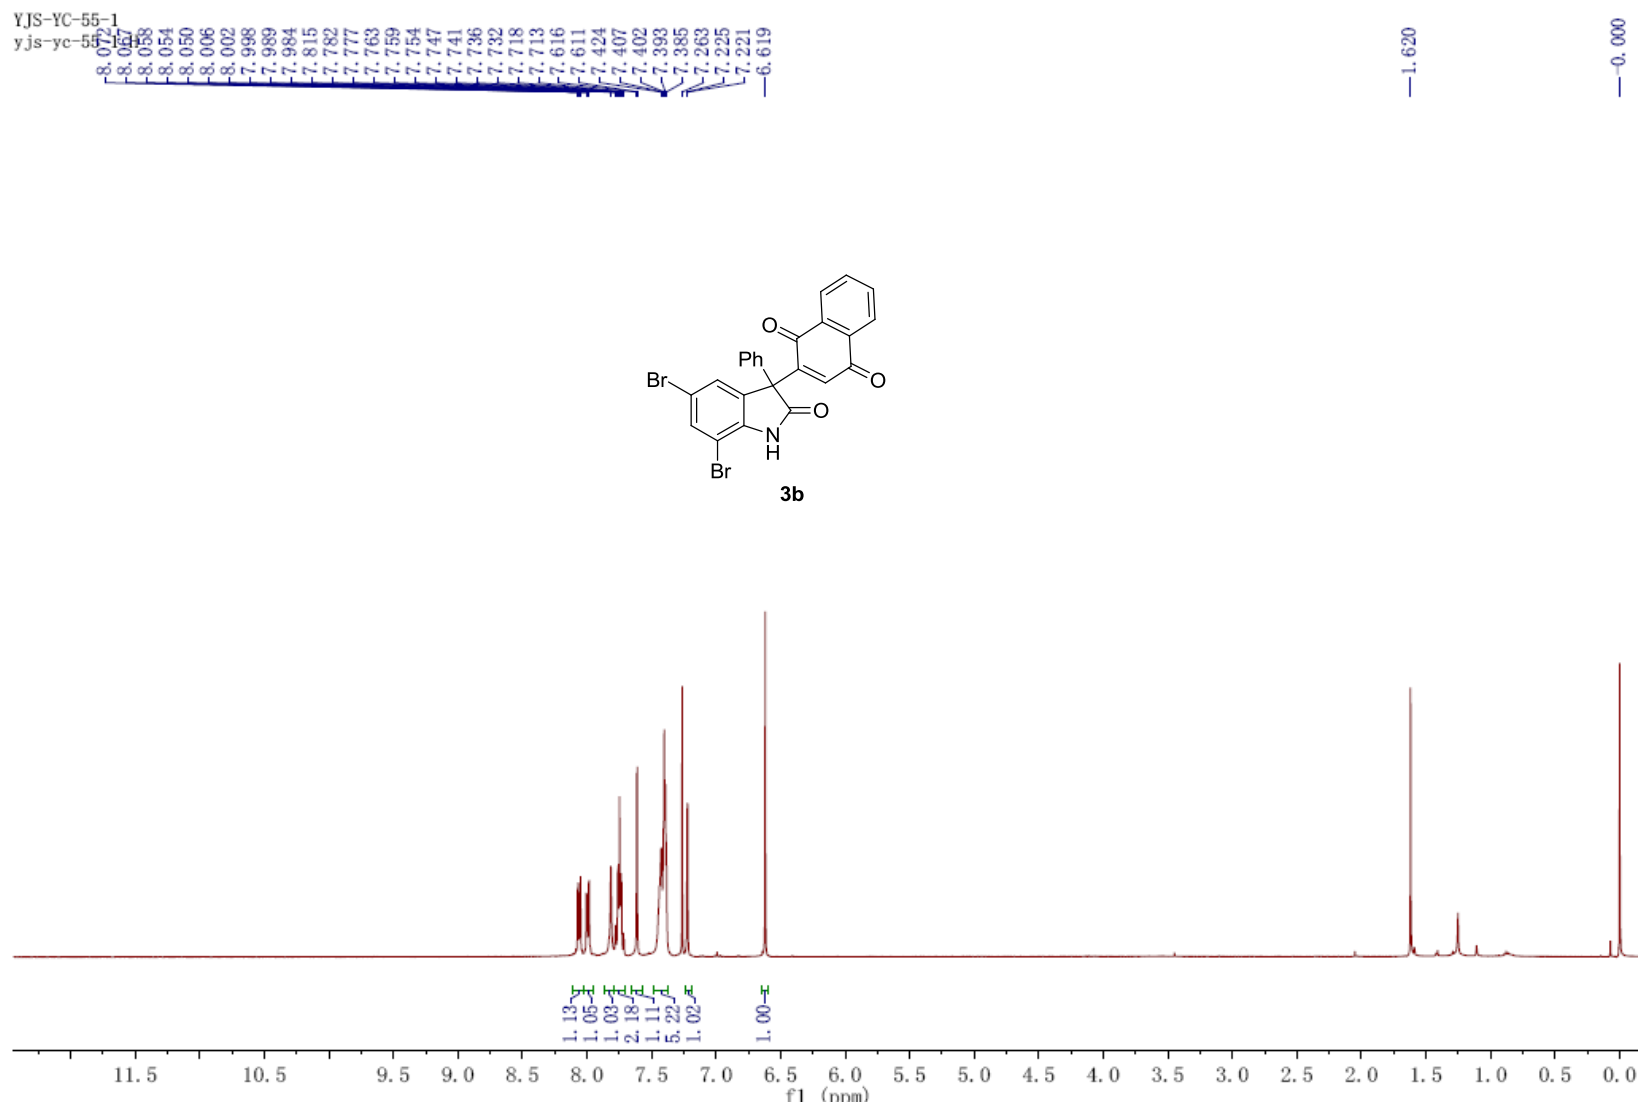

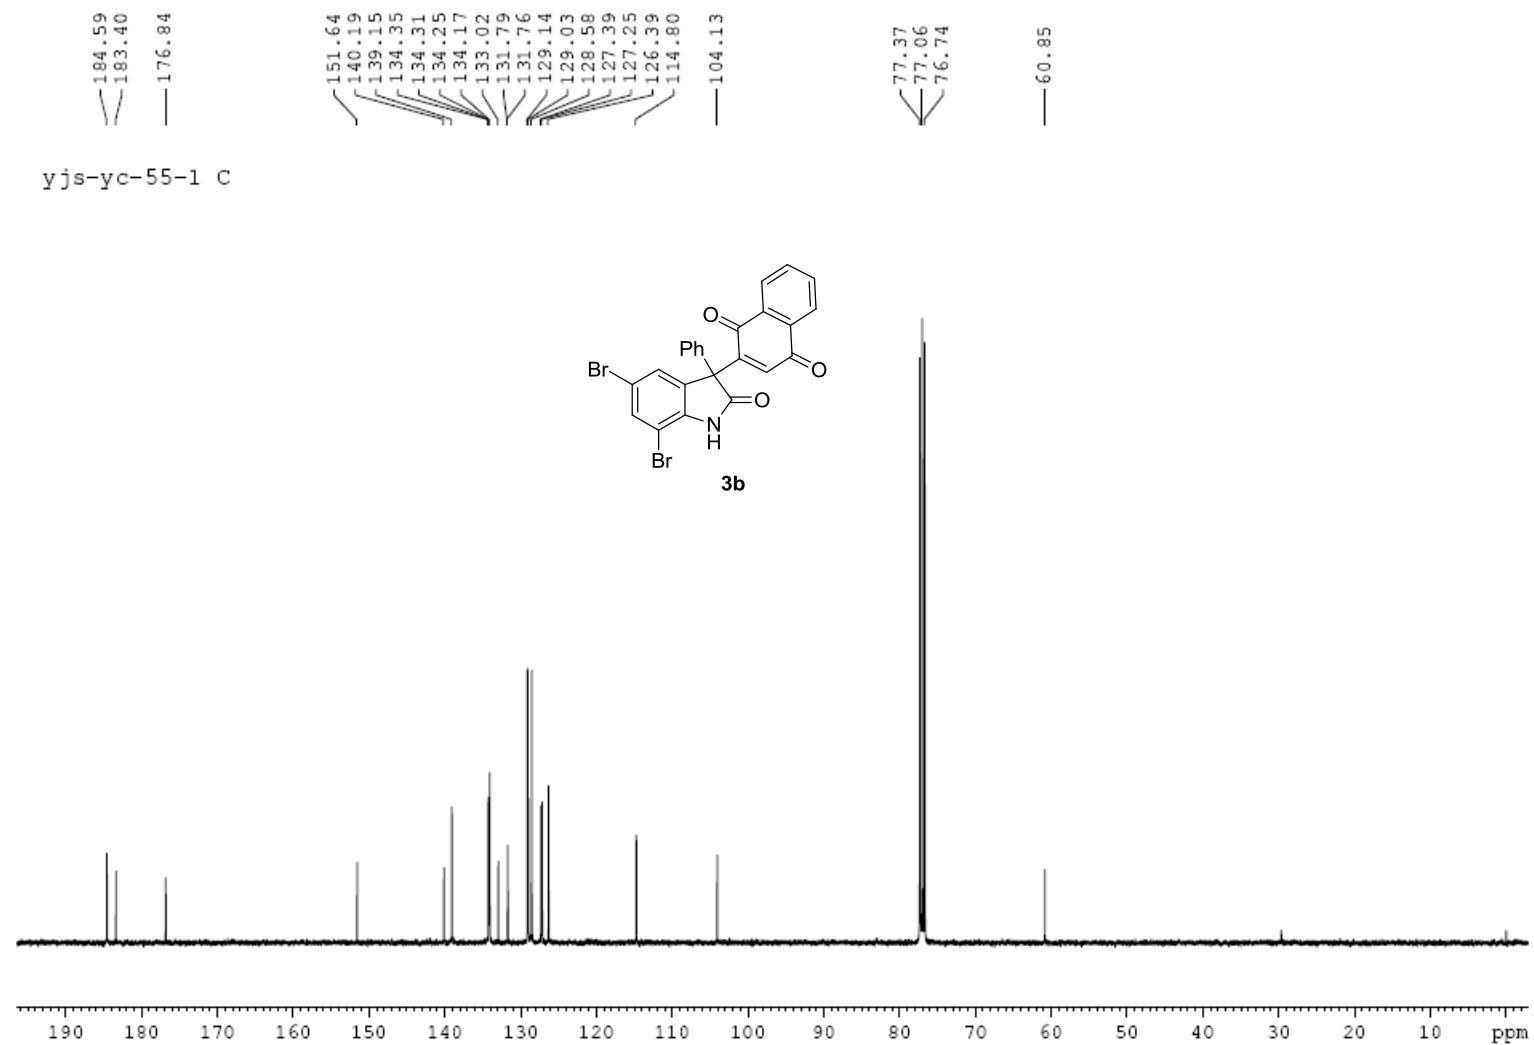



yjs-yc-55-2 H

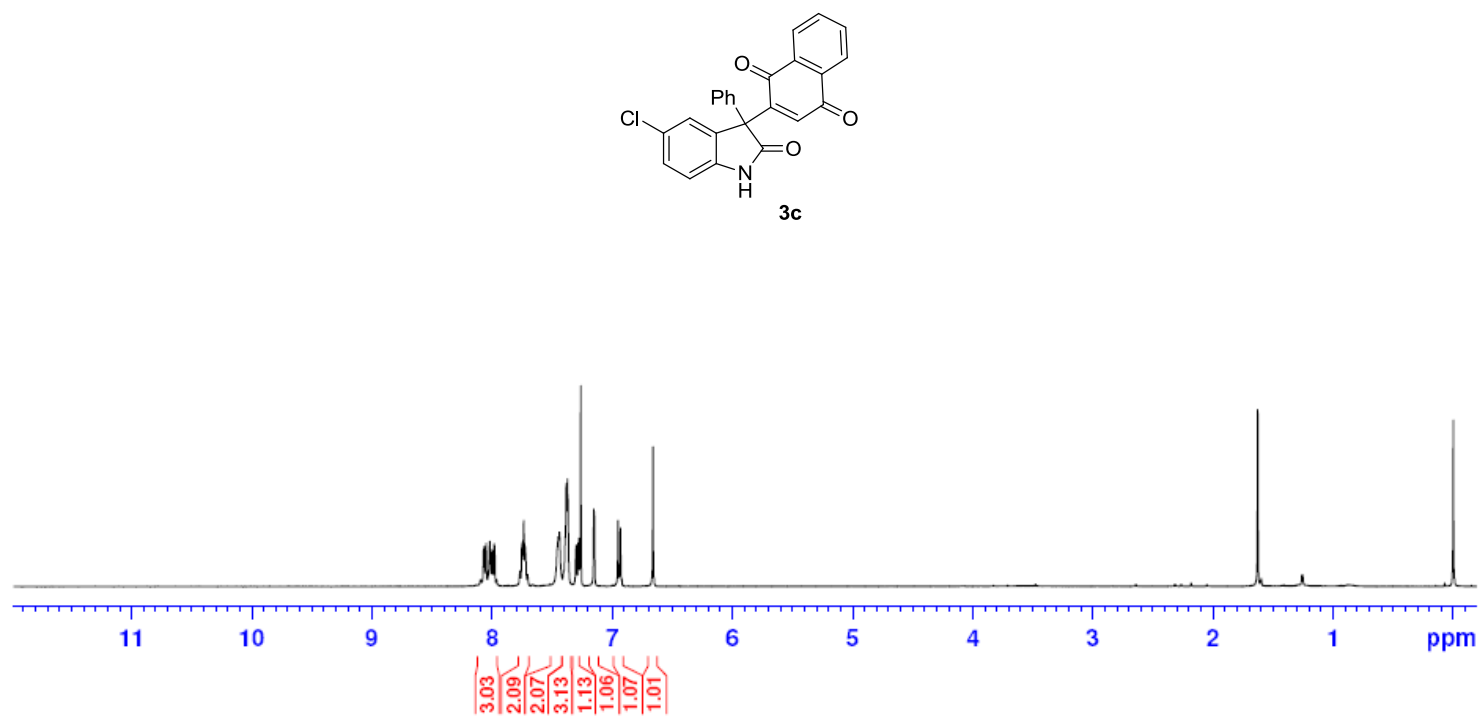

YJS-YC  
YJS-YC  
184.76  
183.45  
178.84  
C

151.88  
140.14  
138.94  
135.01  
134.15  
134.07  
132.09  
131.67  
129.15  
128.91  
128.67  
128.56  
127.34  
127.14  
126.23  
125.68  
121.82

77.32  
77.20  
77.00  
76.68

59.87

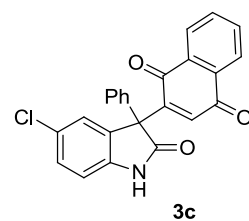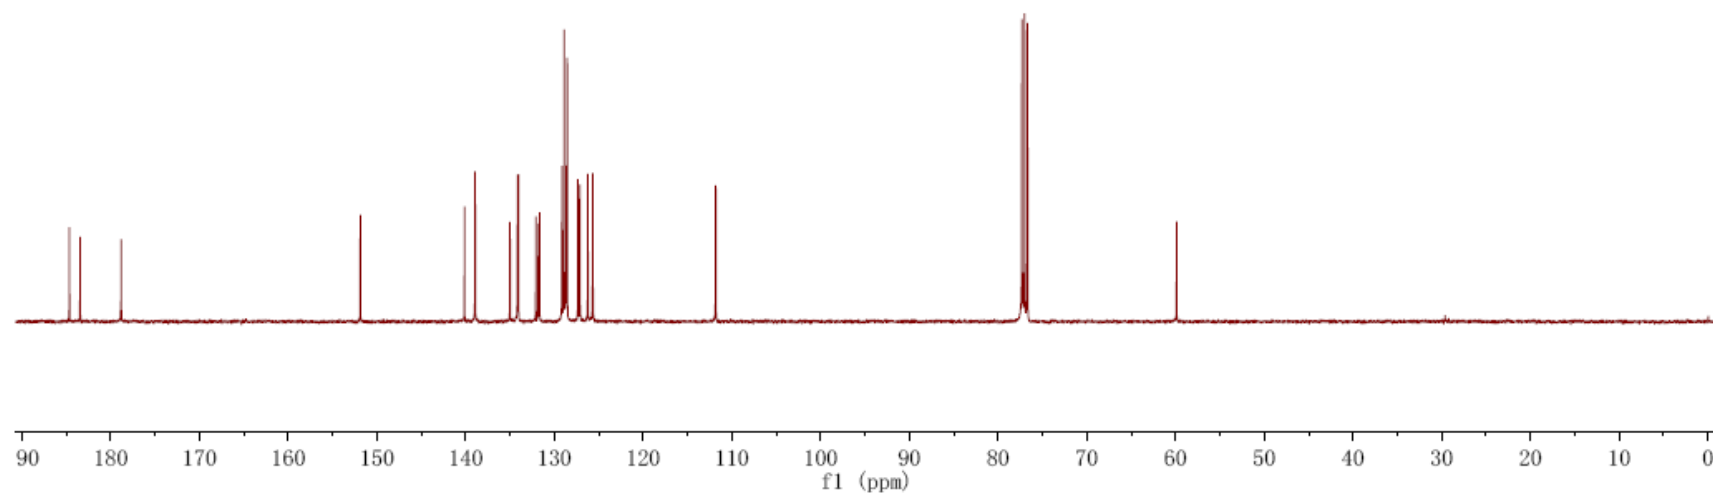

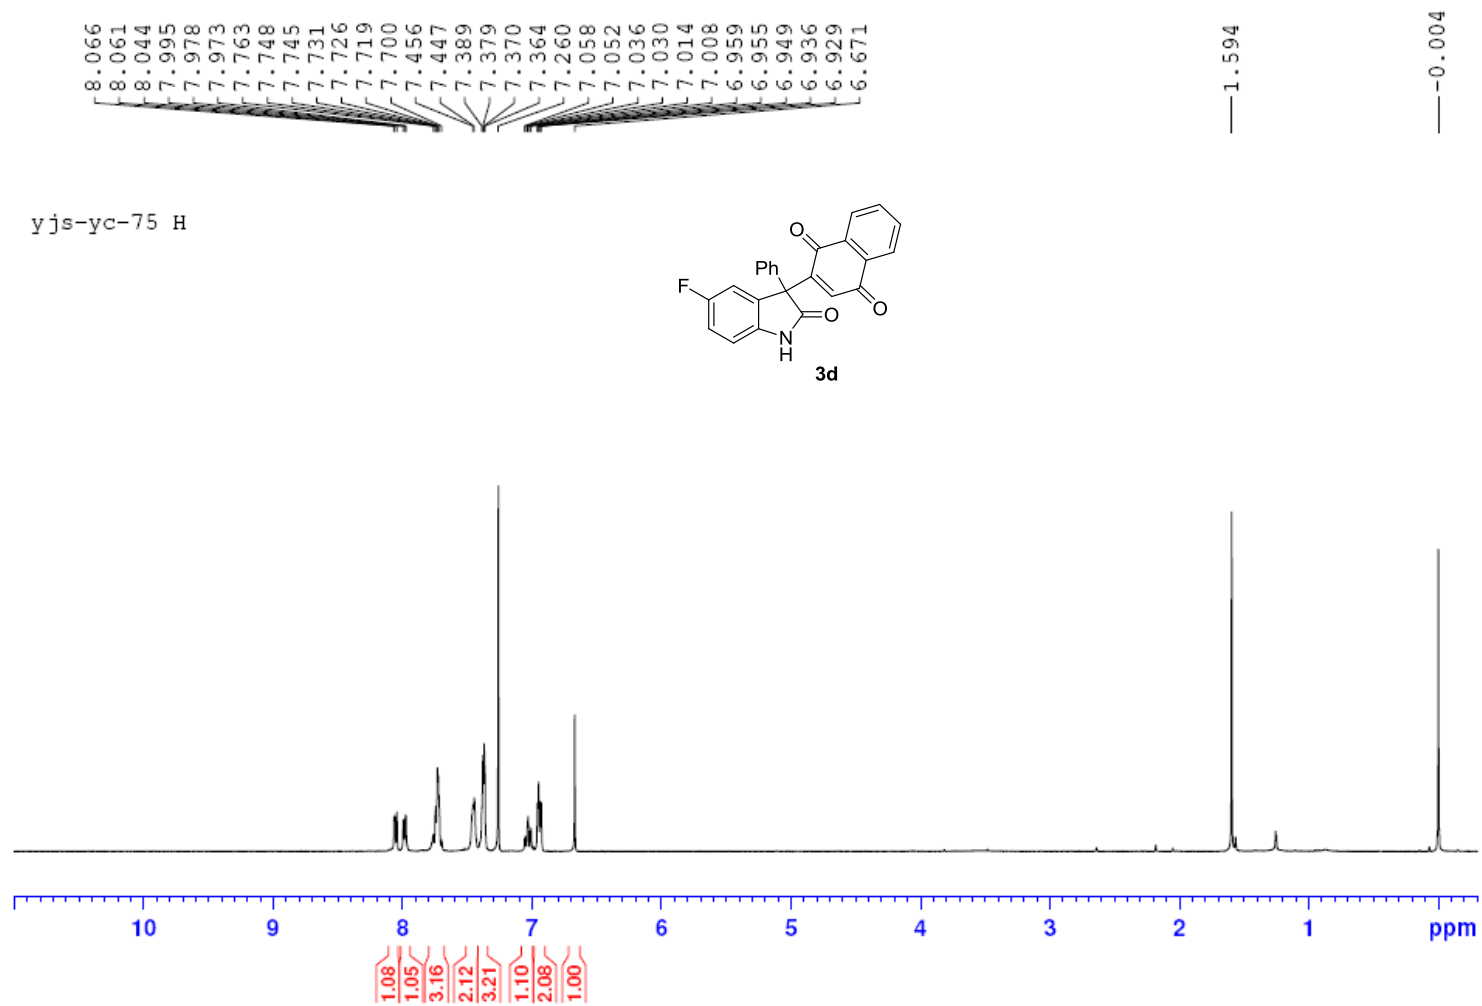

yjs-yc-75  
yjs-yc-75

159.71  
157.31  
151.87  
138.87  
135.24  
134.13  
134.07  
131.88  
131.68  
128.89  
128.60  
128.50  
127.13  
118.70  
115.47  
113.60  
113.35  
111.44  
111.36

77.32  
77.00  
76.68

60.20

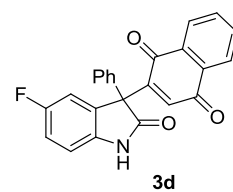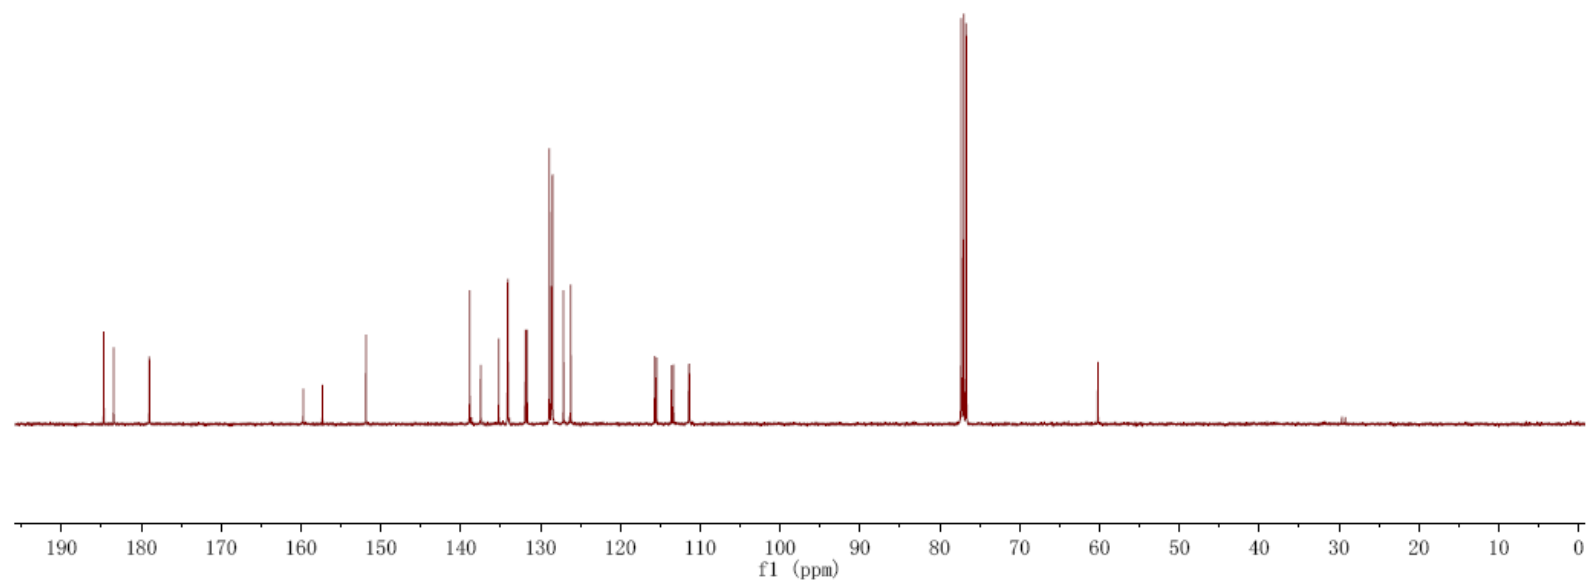

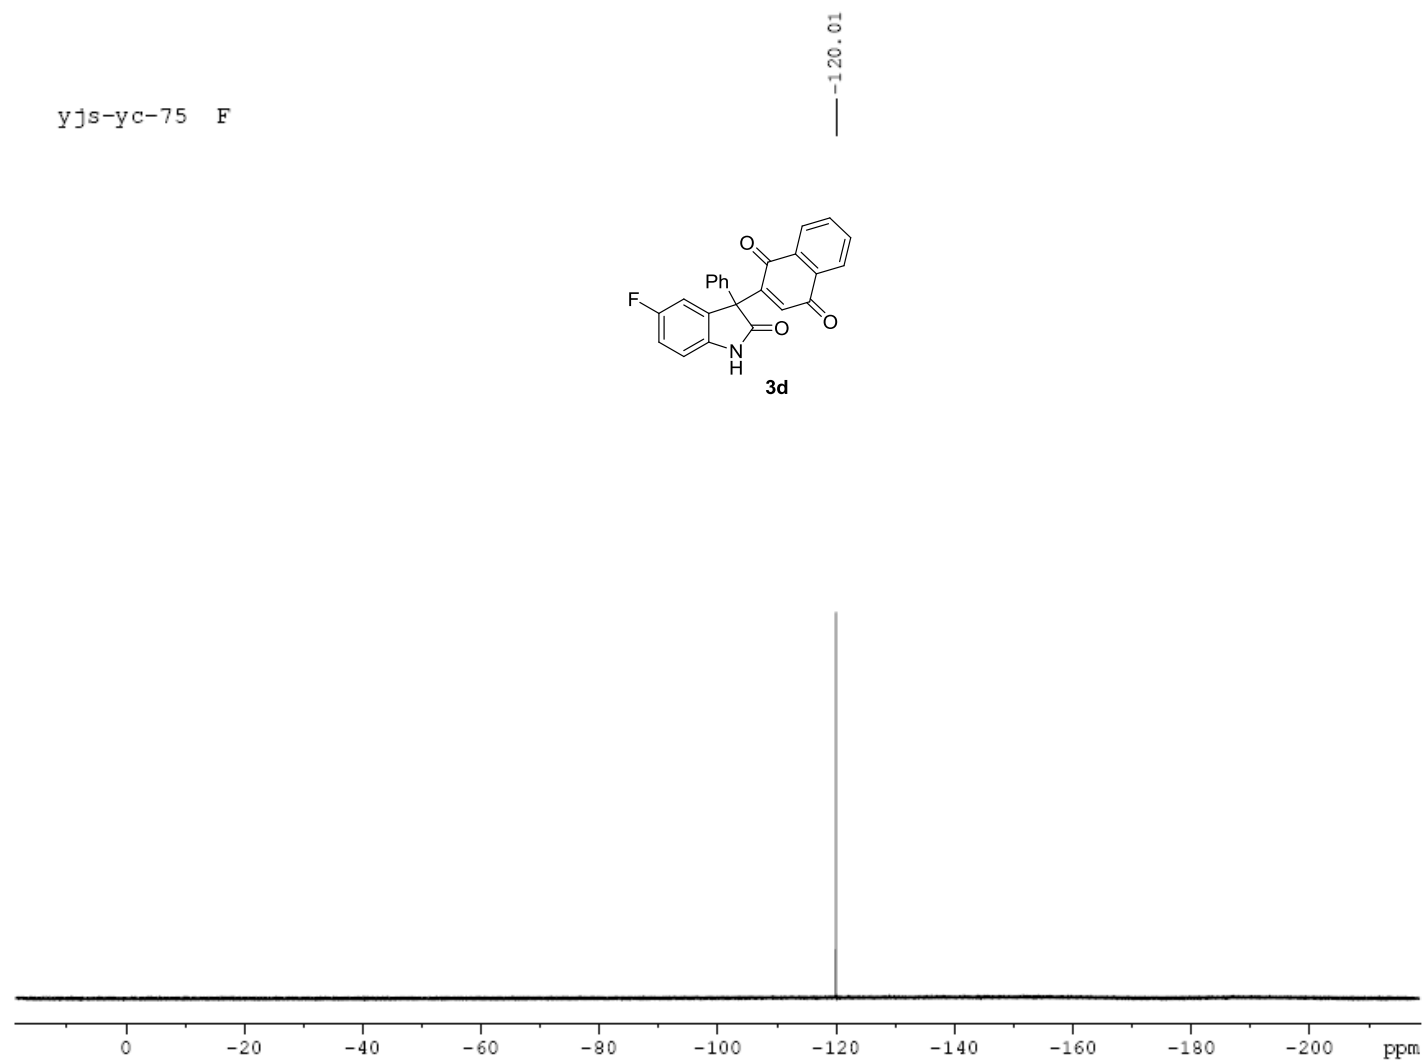

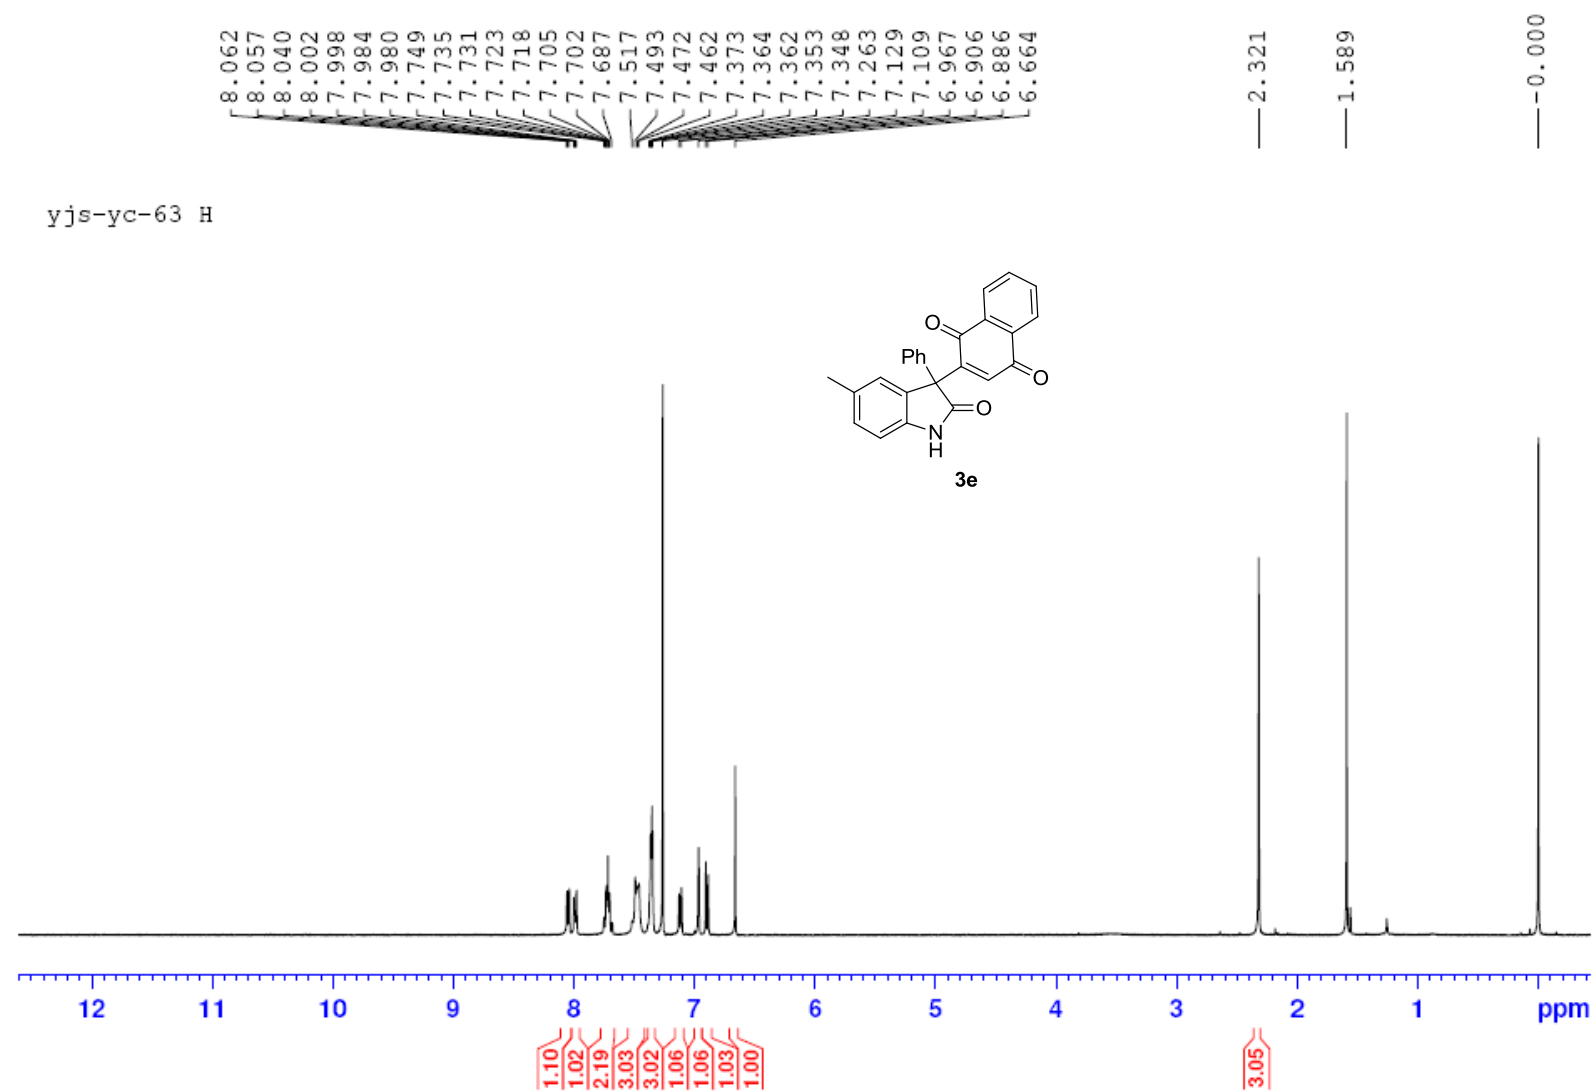

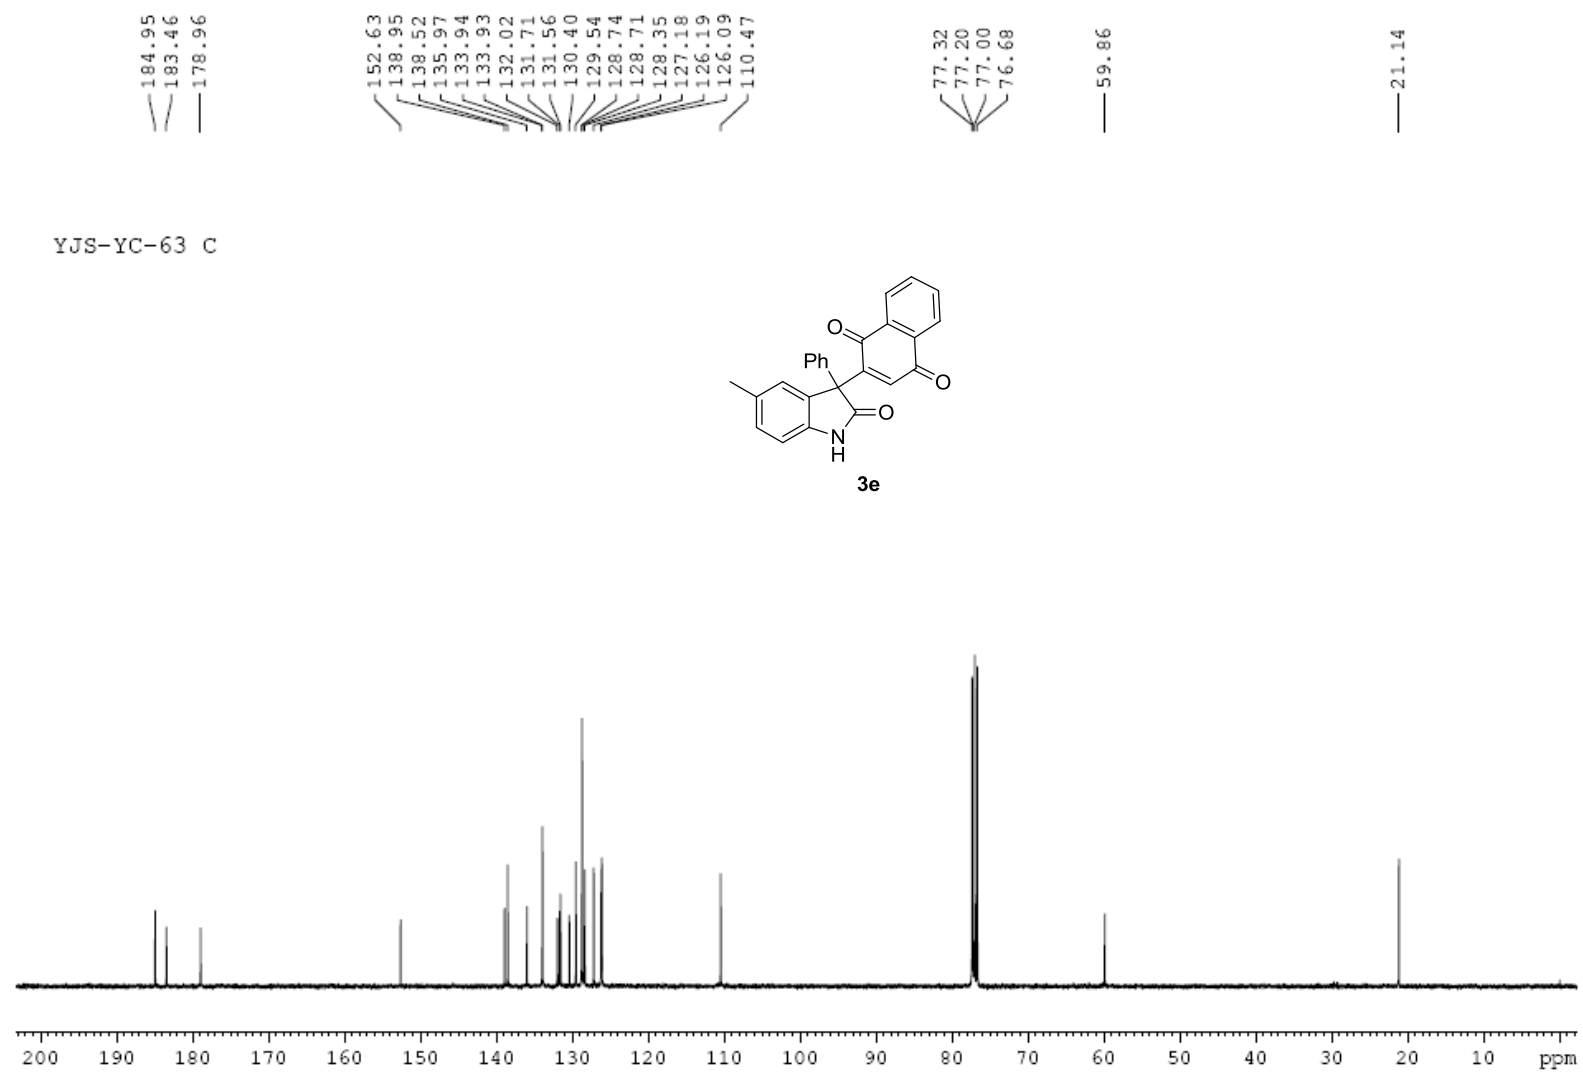

yjs-yc-27-3  
yjs-yc-27-3 H

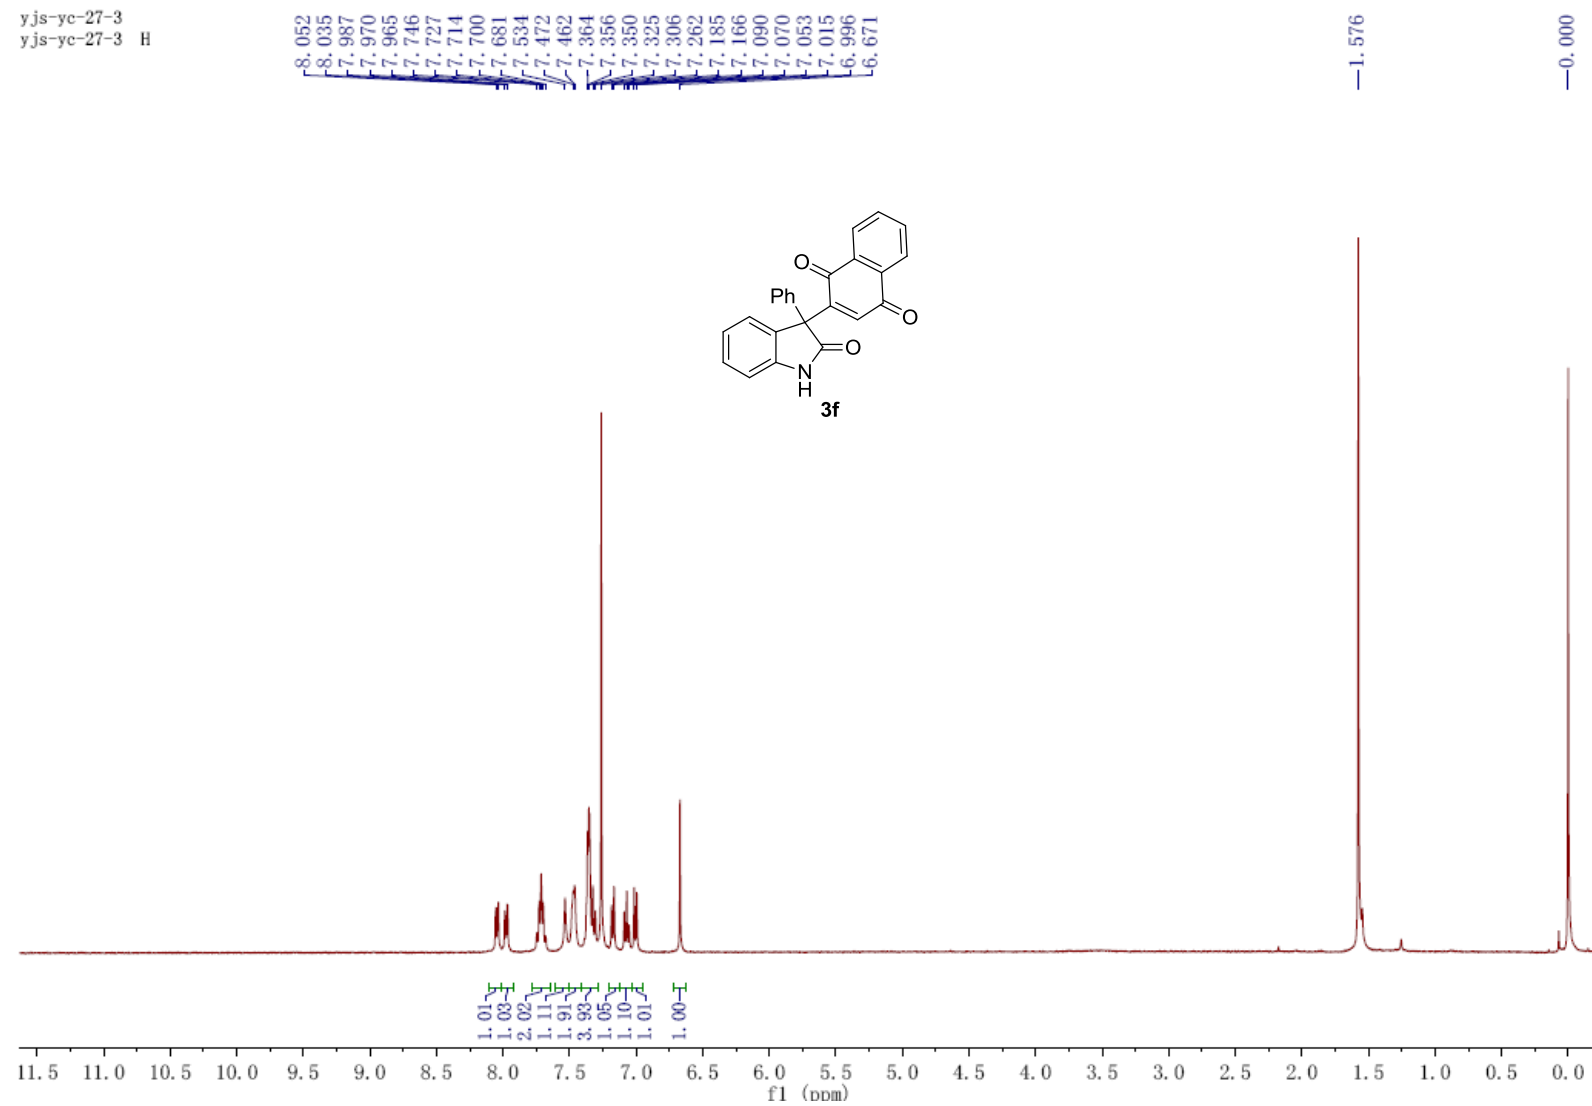



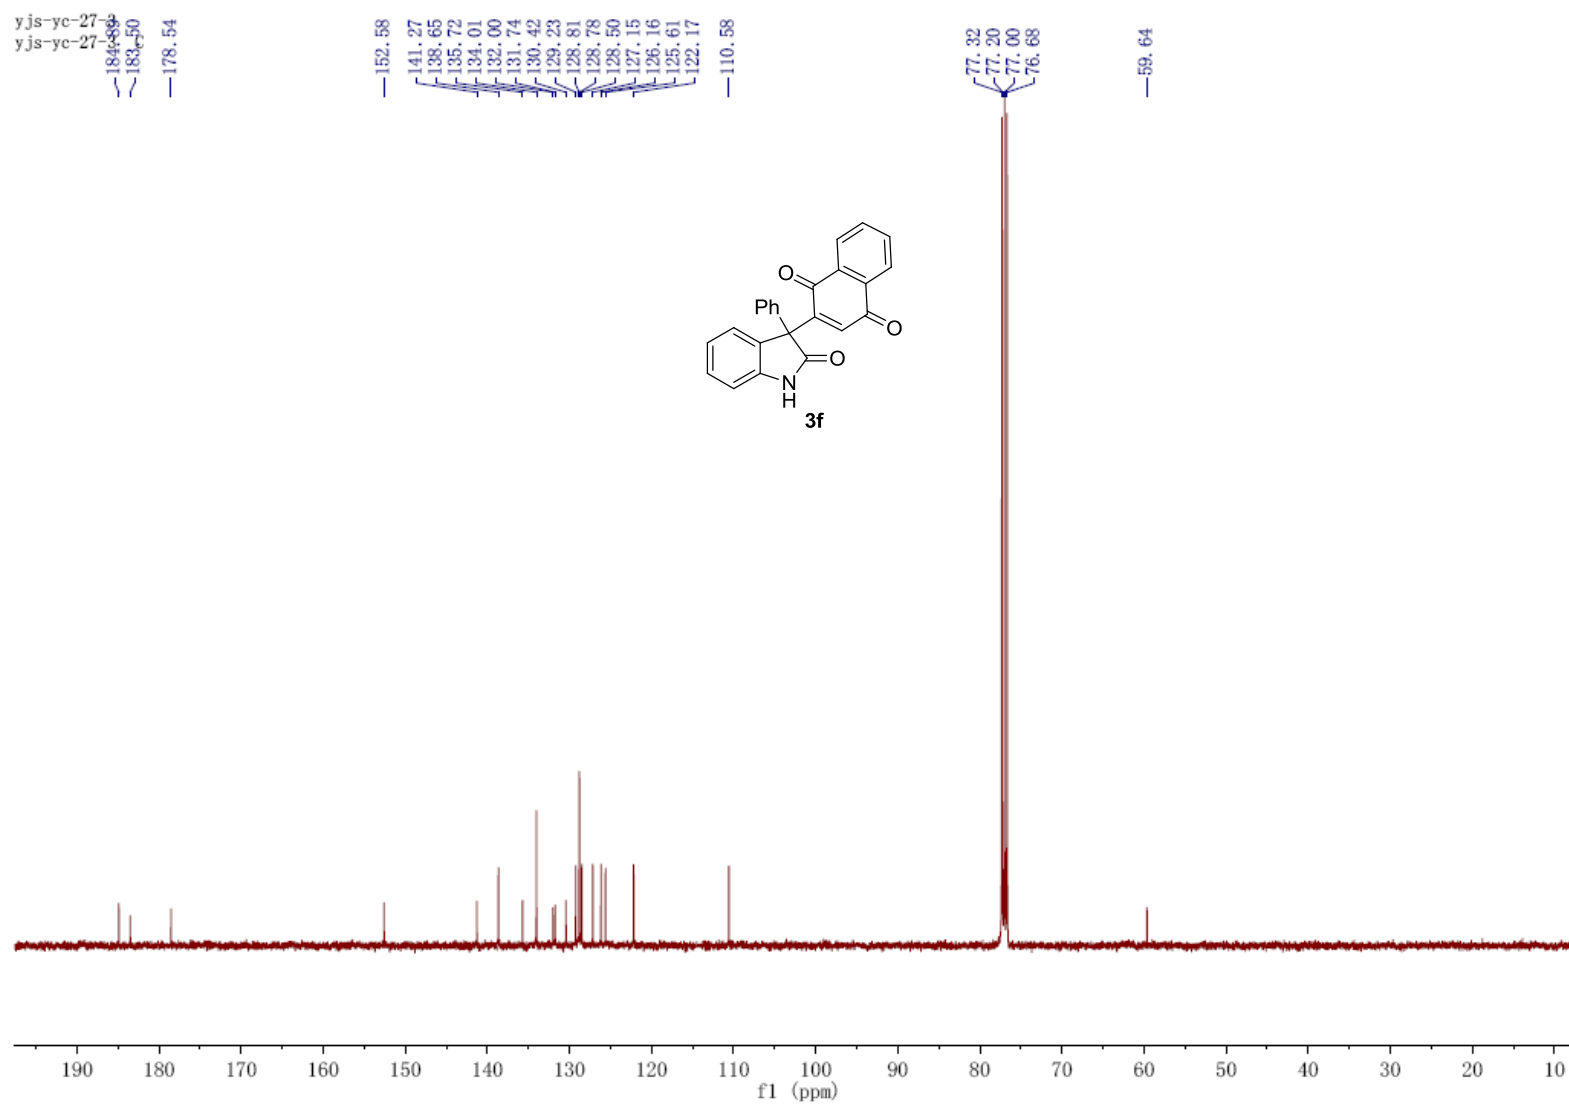

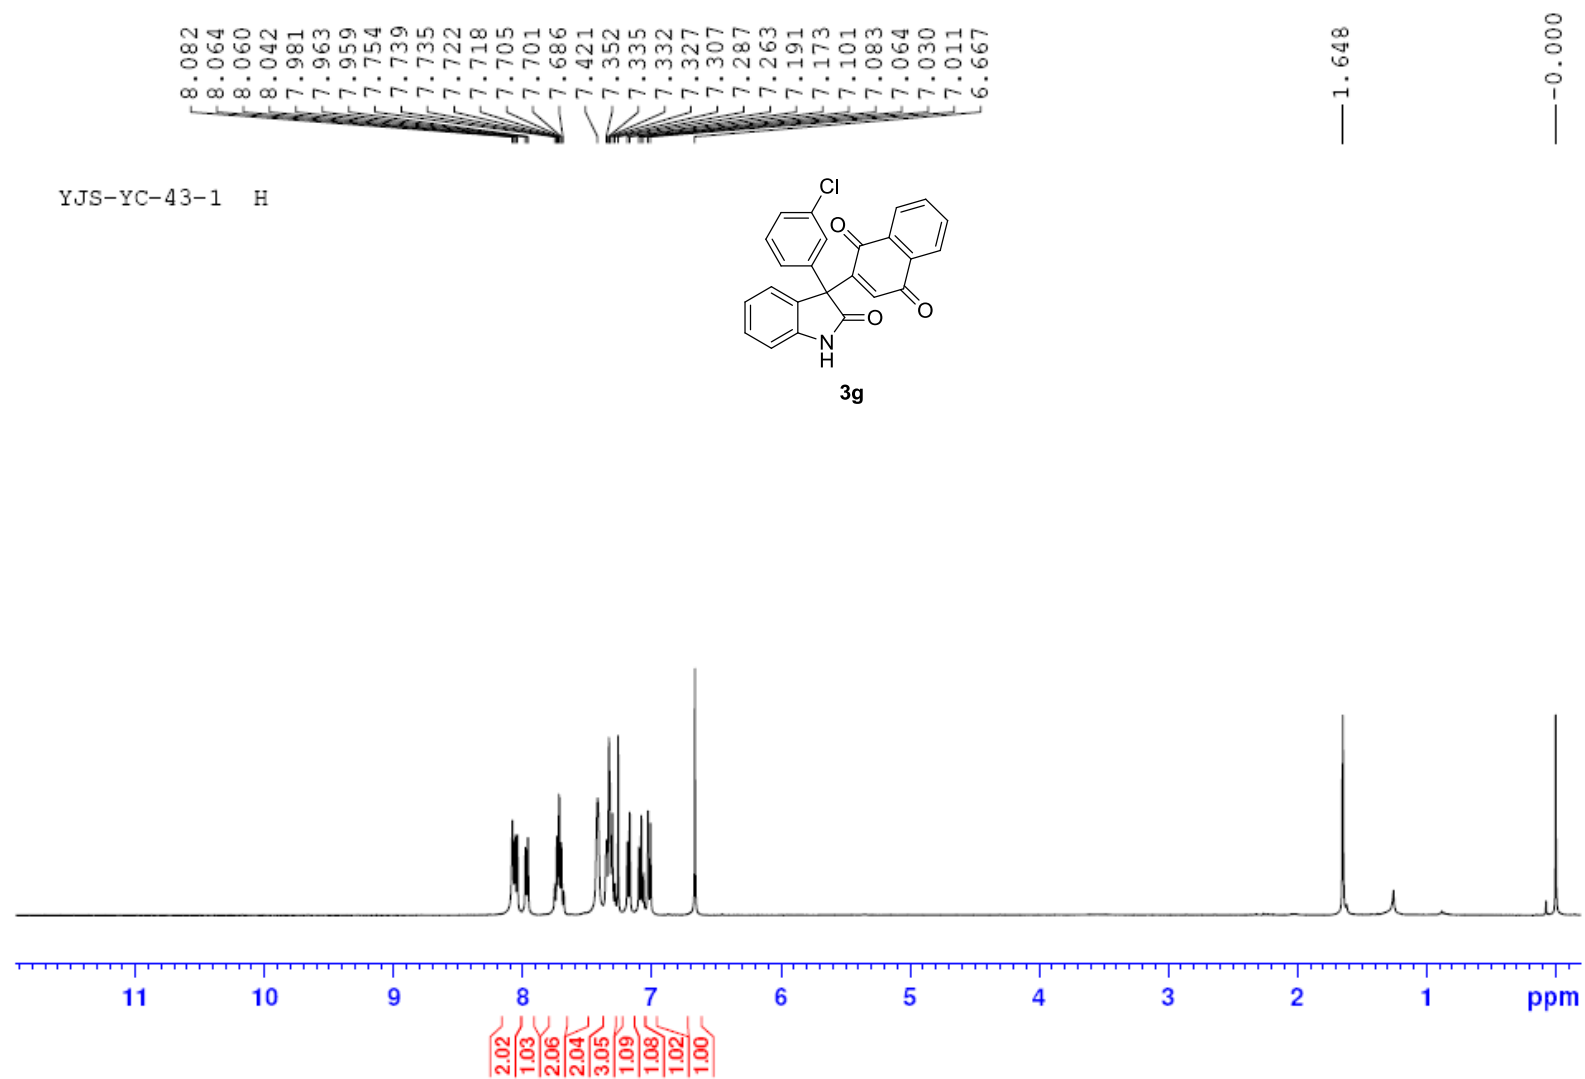

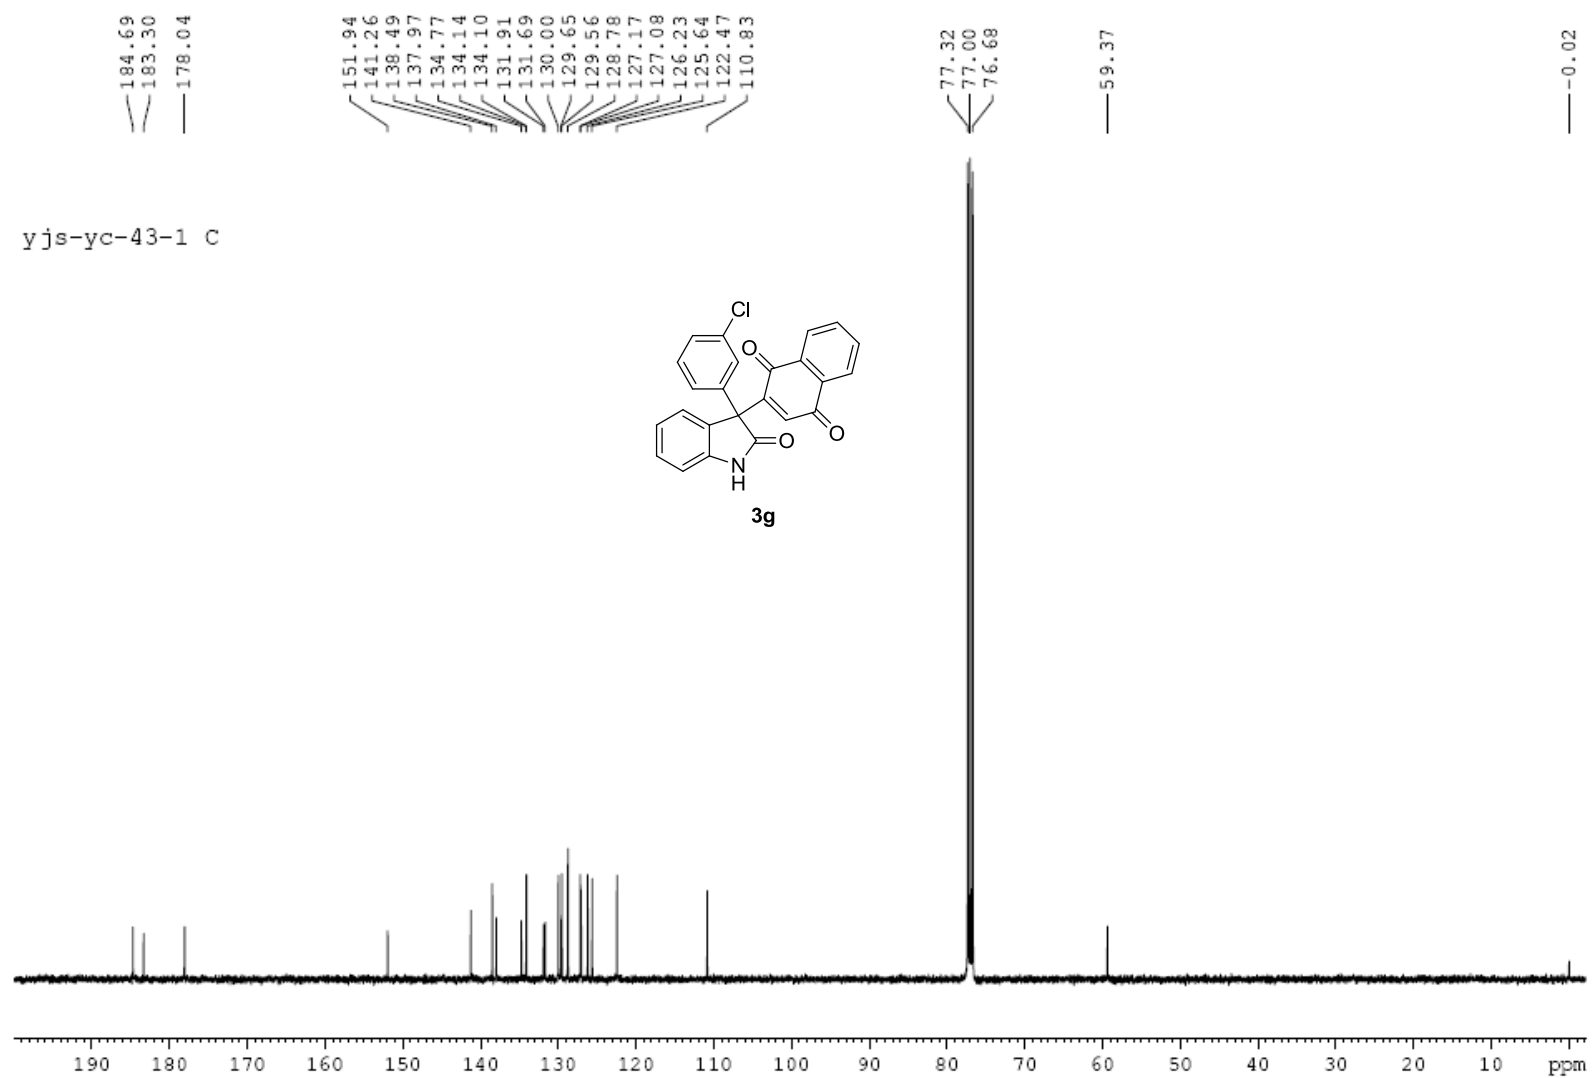

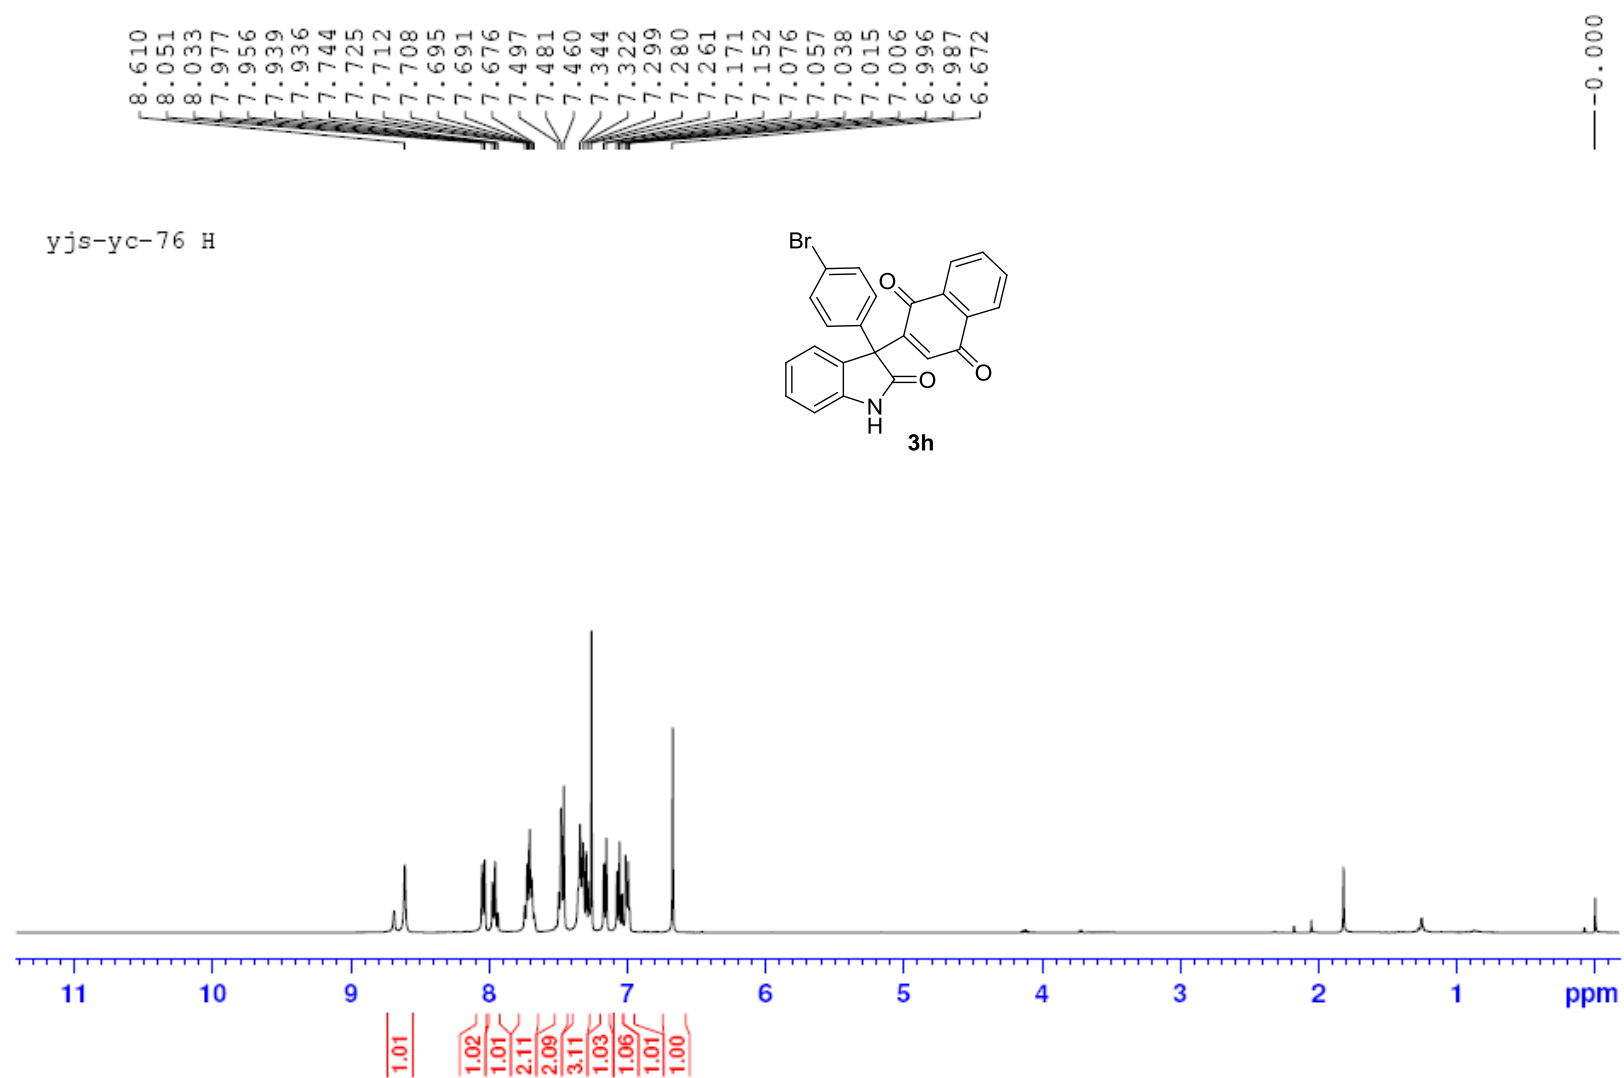

yjs-yc-76  
yjs-yc-76 C

184.67  
183.31  
178.46

151.90

141.38  
138.43  
135.03  
134.10  
134.07  
131.90  
131.64  
130.40  
129.80  
129.45  
127.15  
126.19  
125.52  
122.83  
117.92

77.32  
77.00  
76.68

59.35

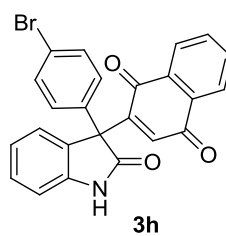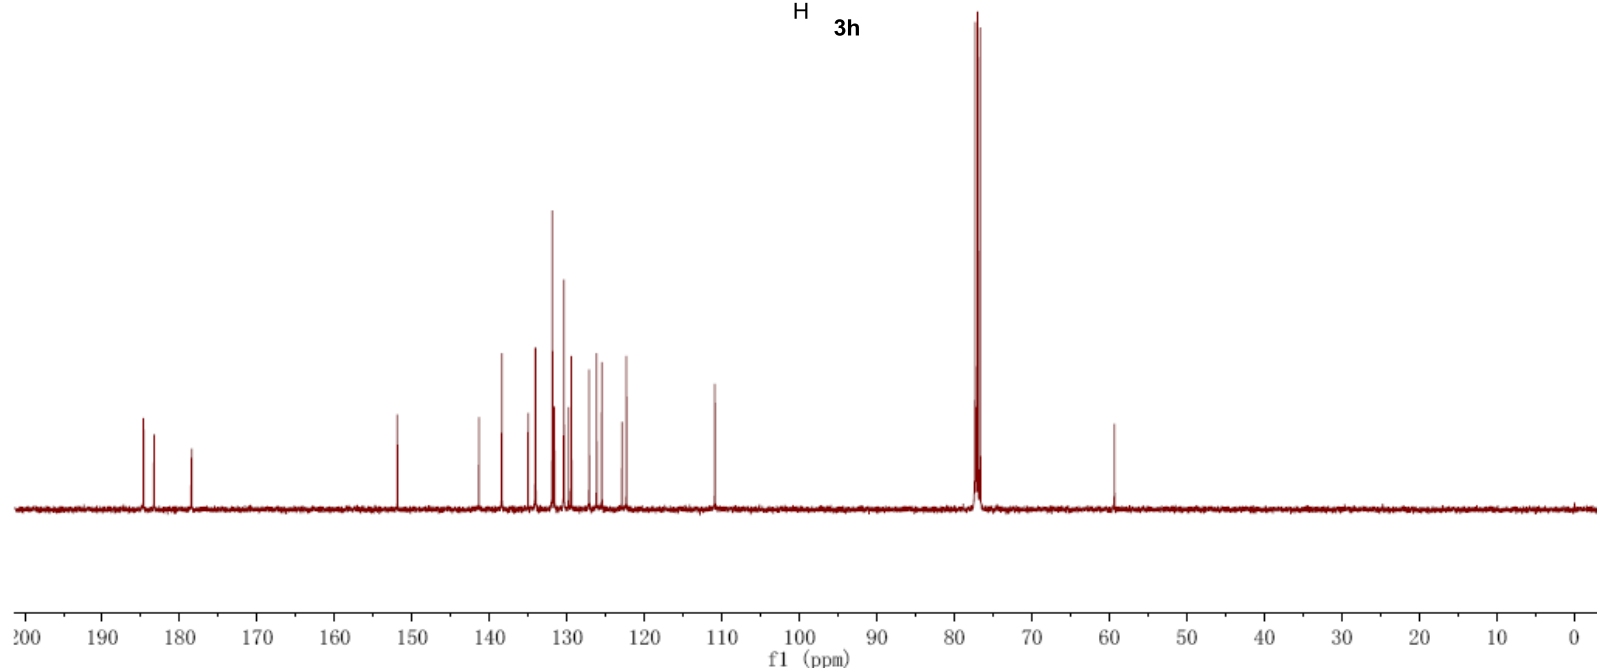

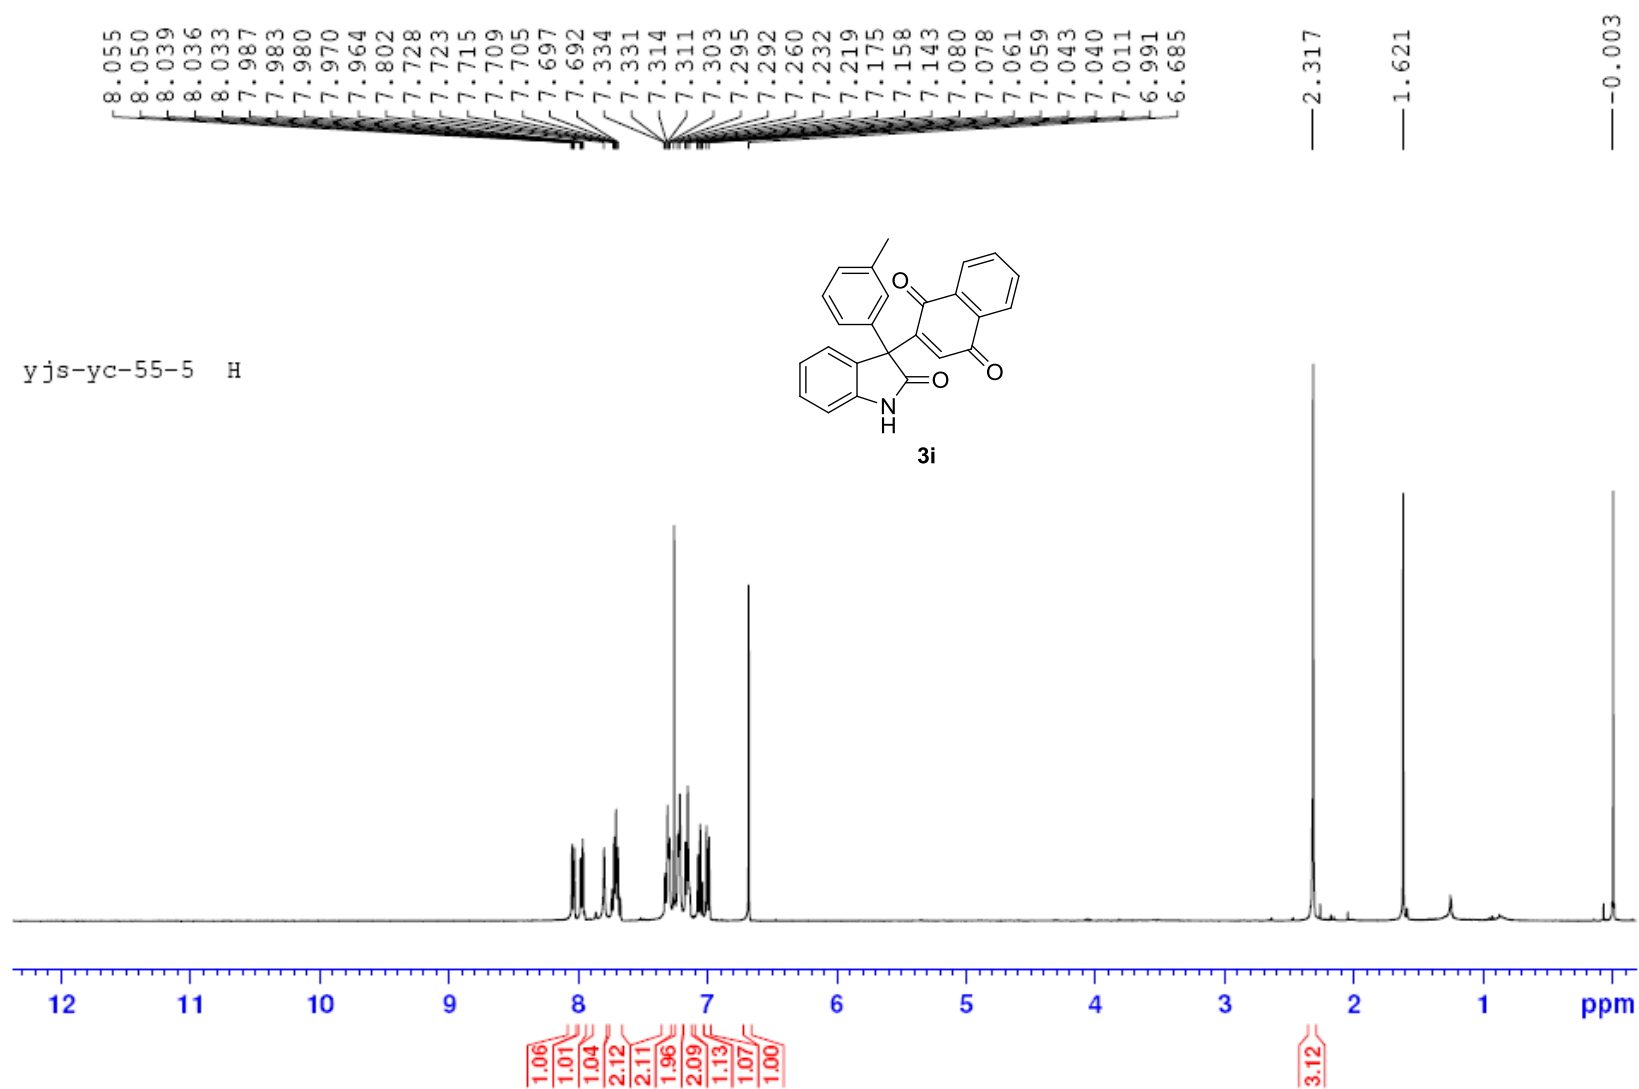

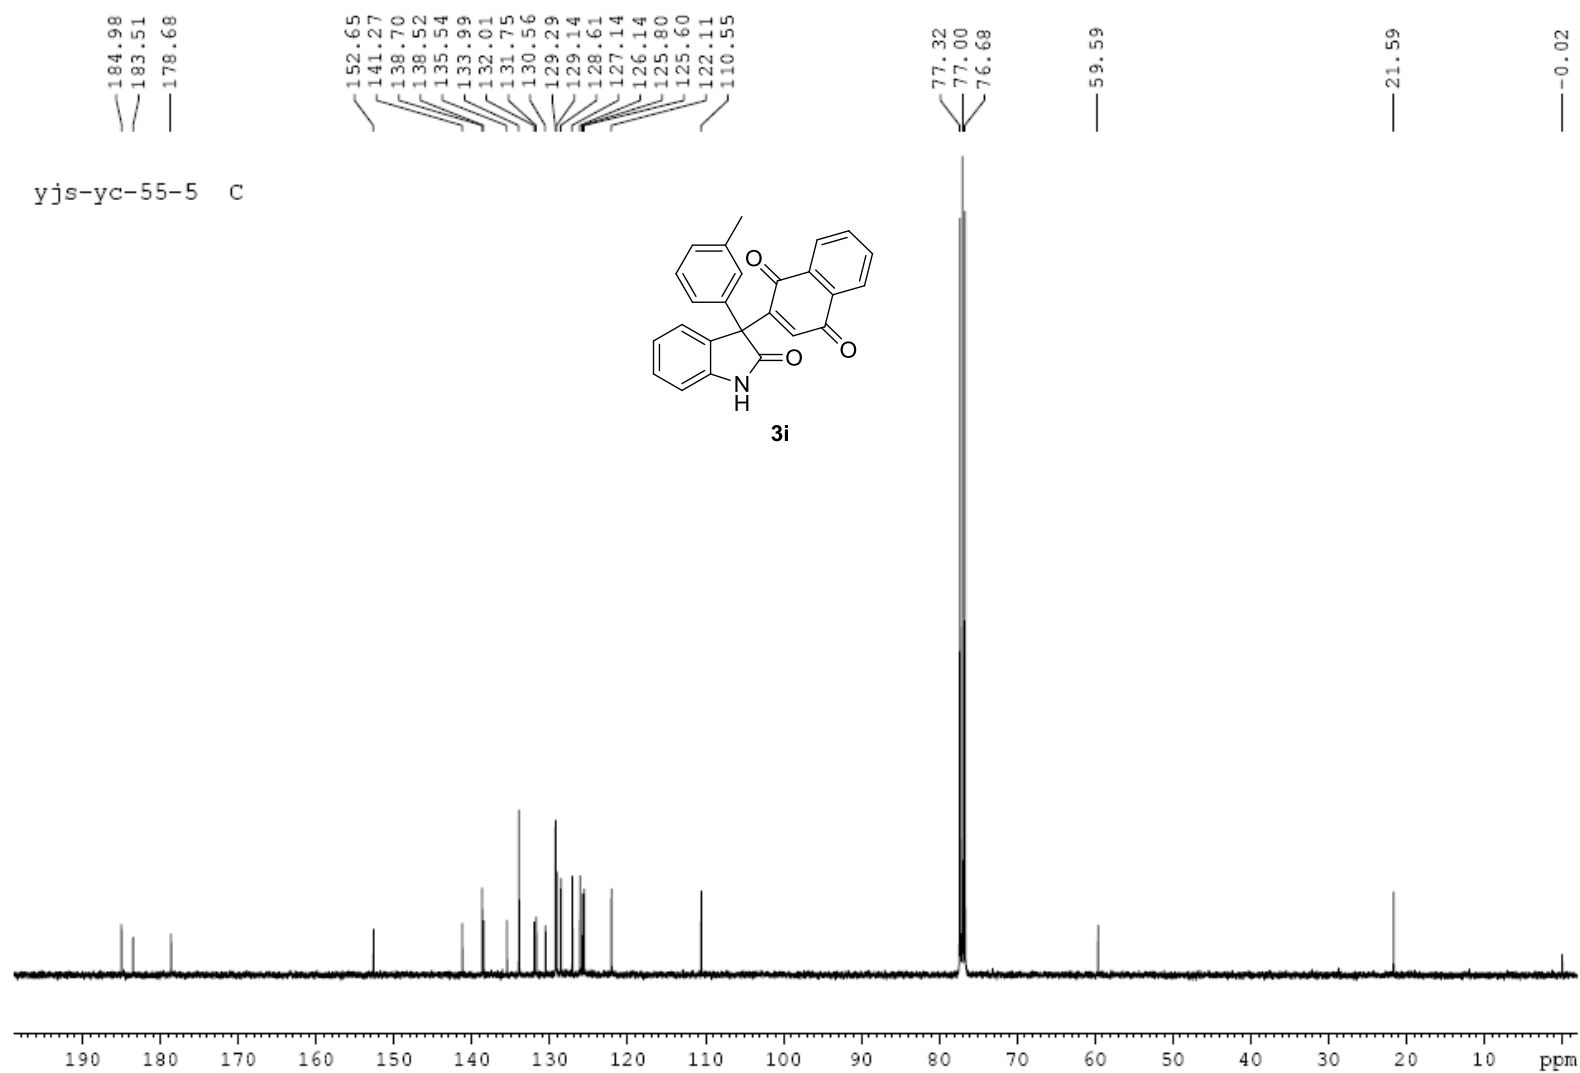

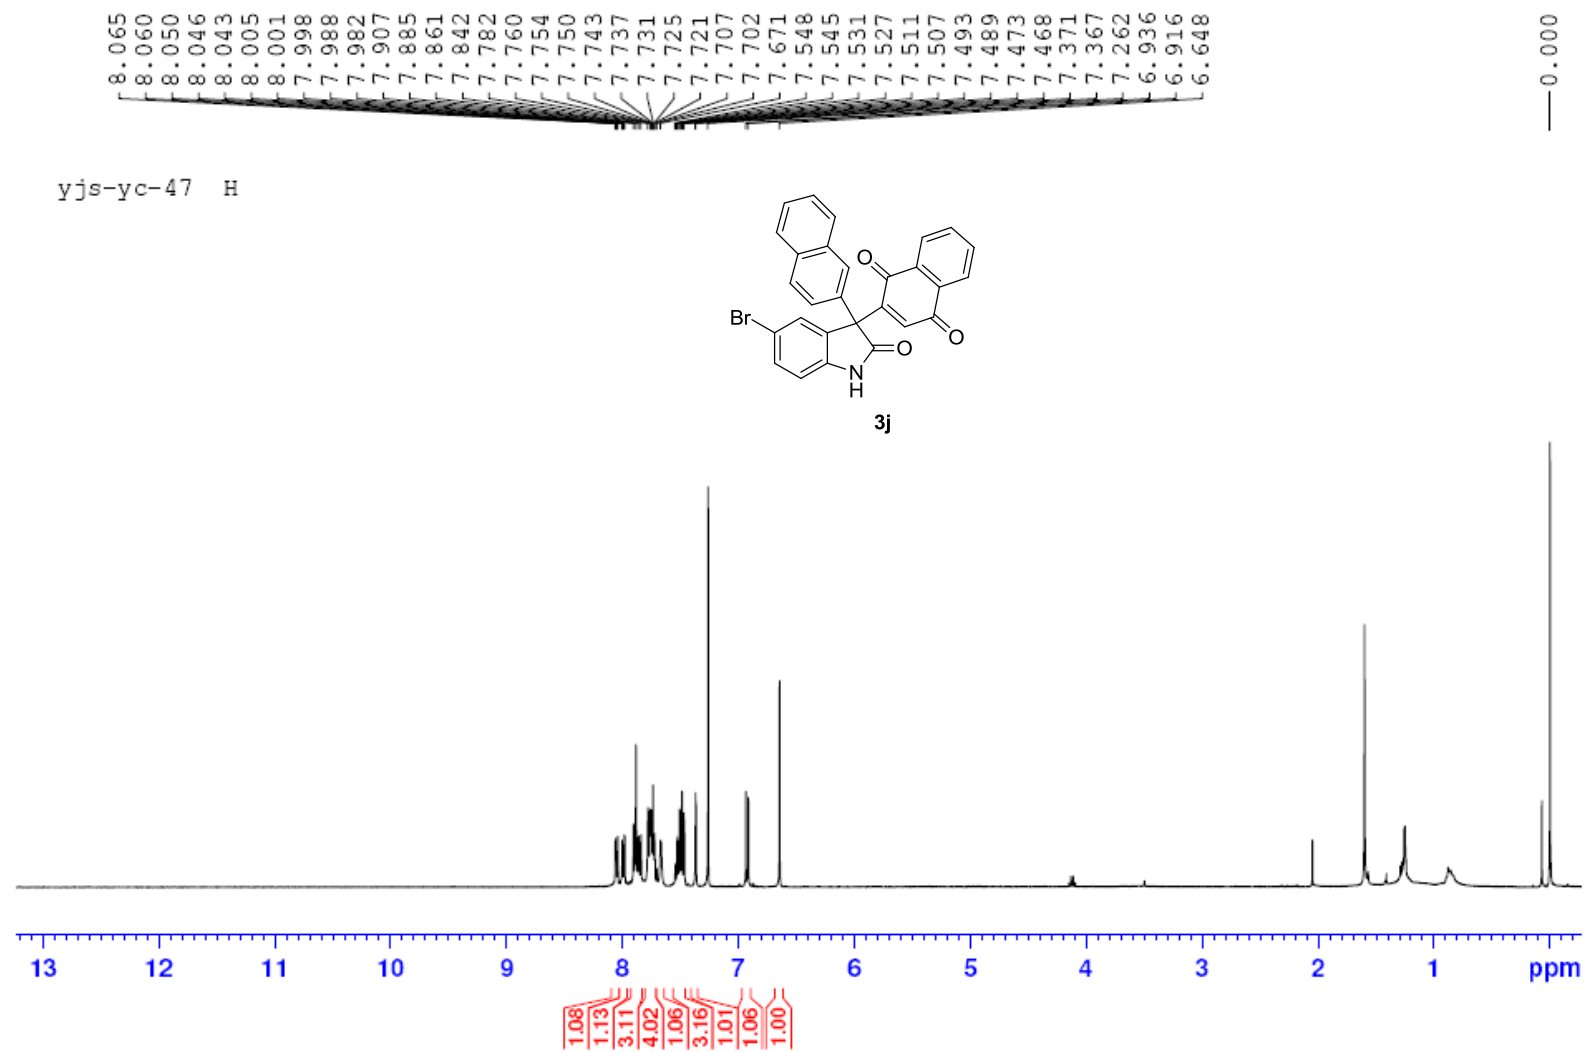



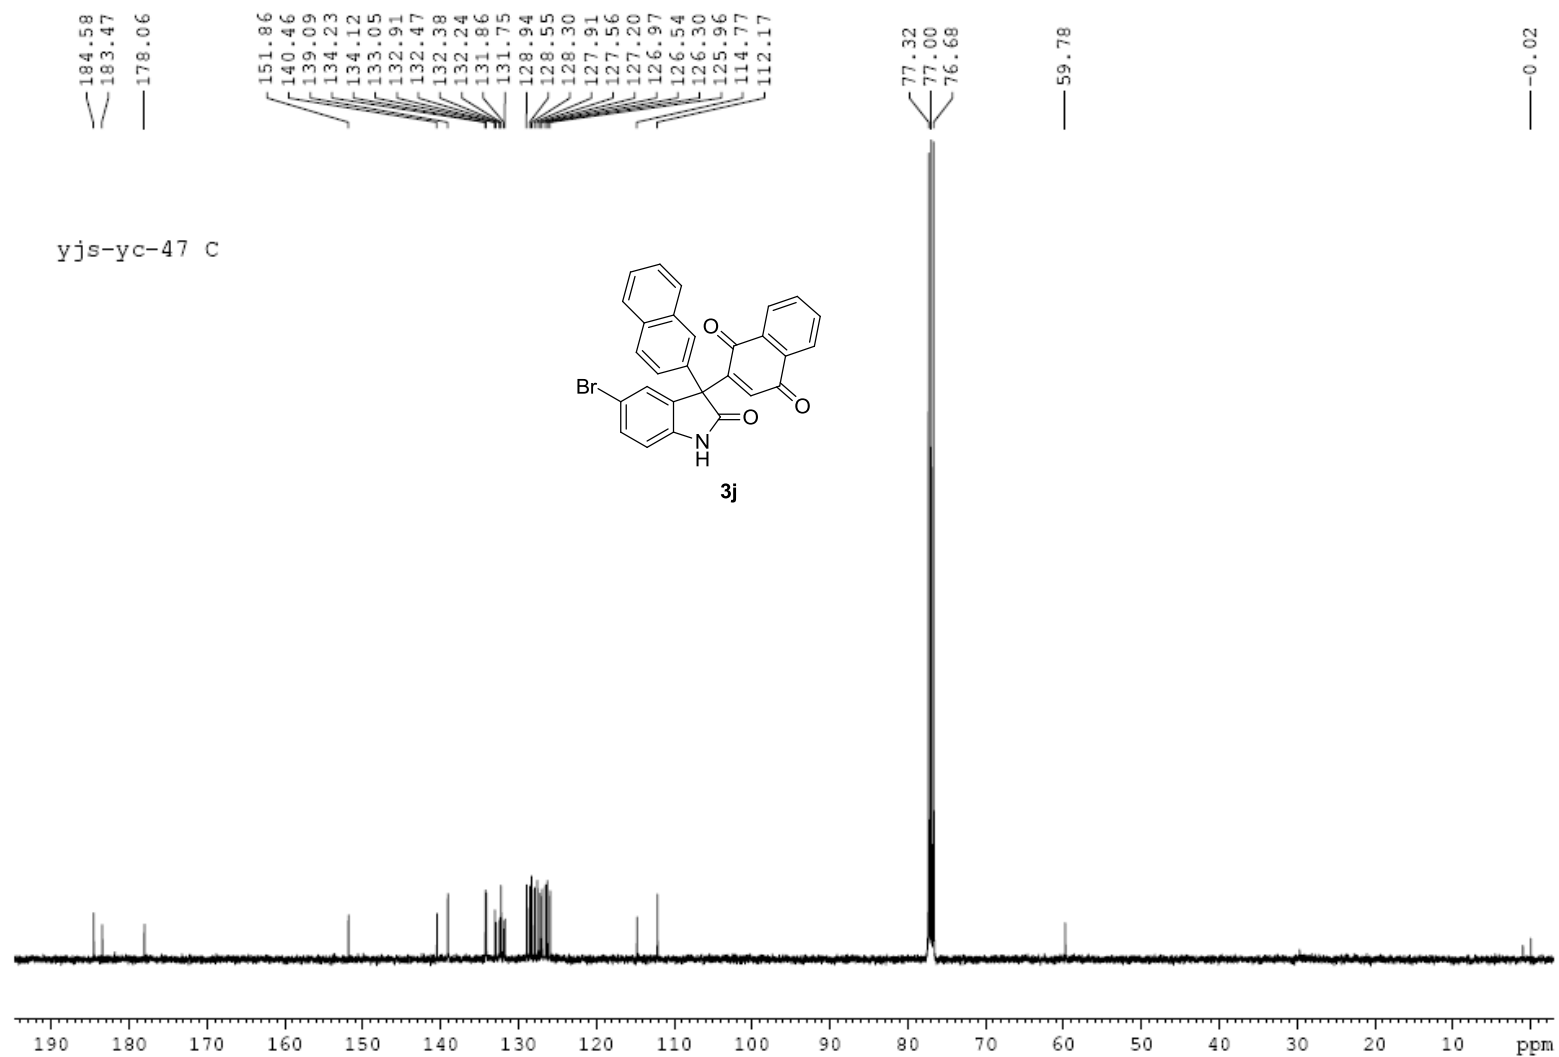

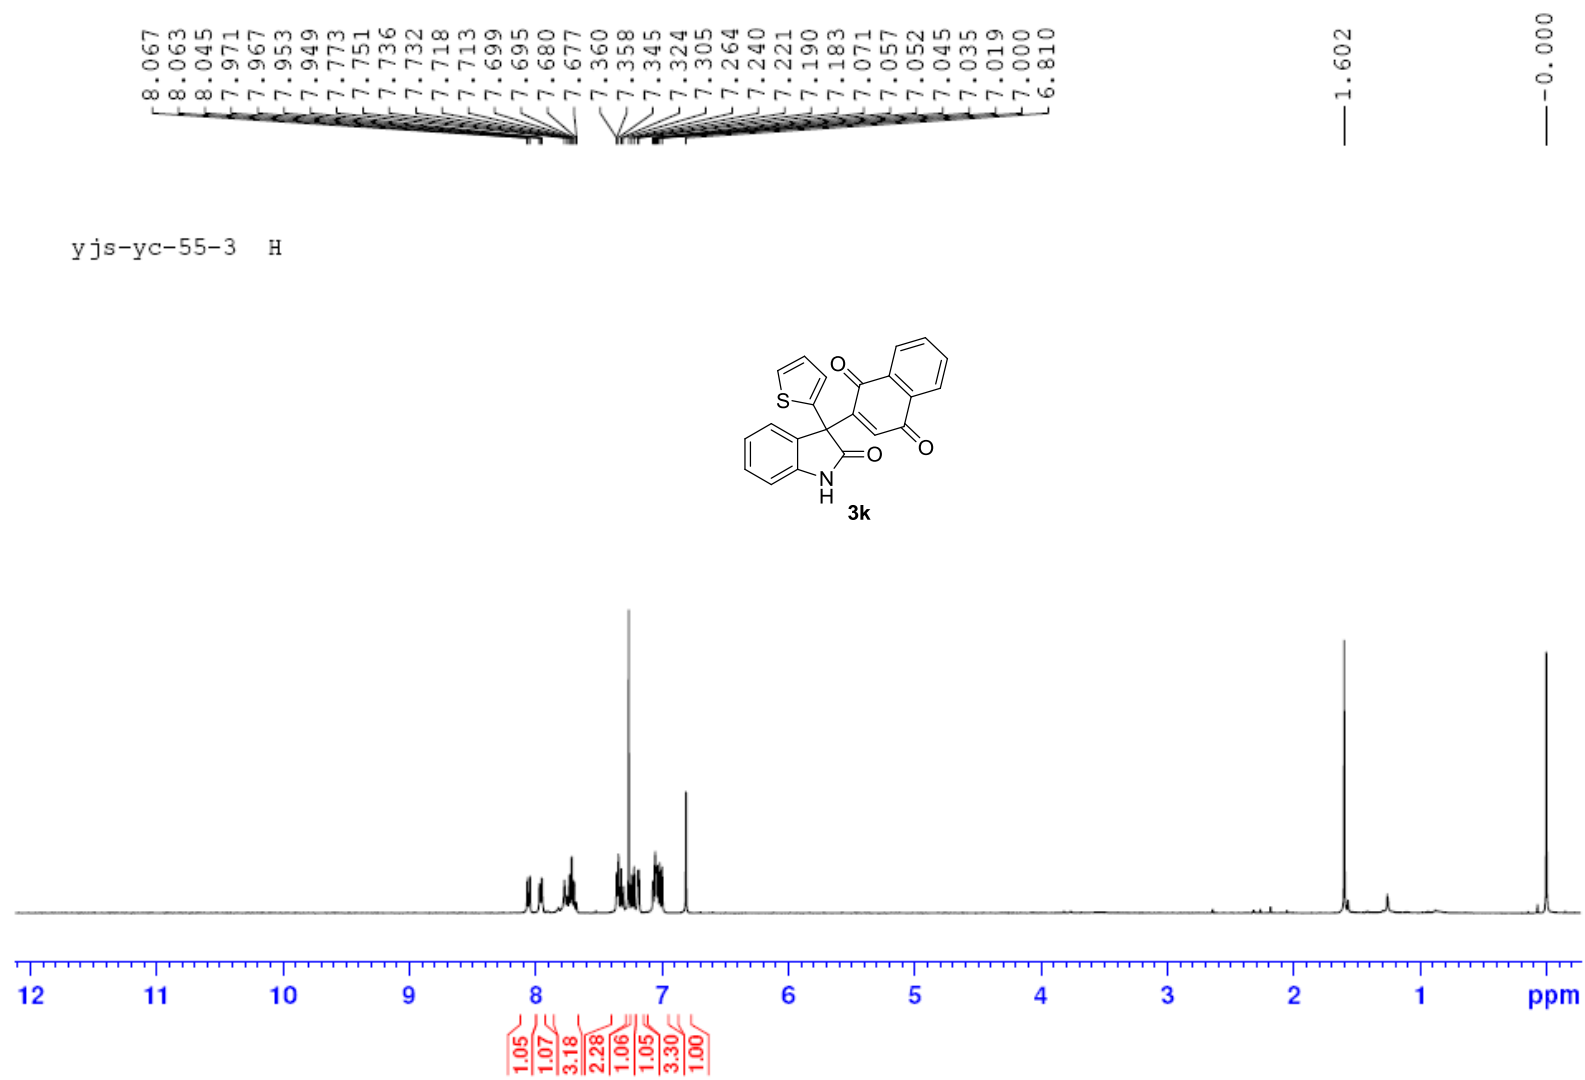

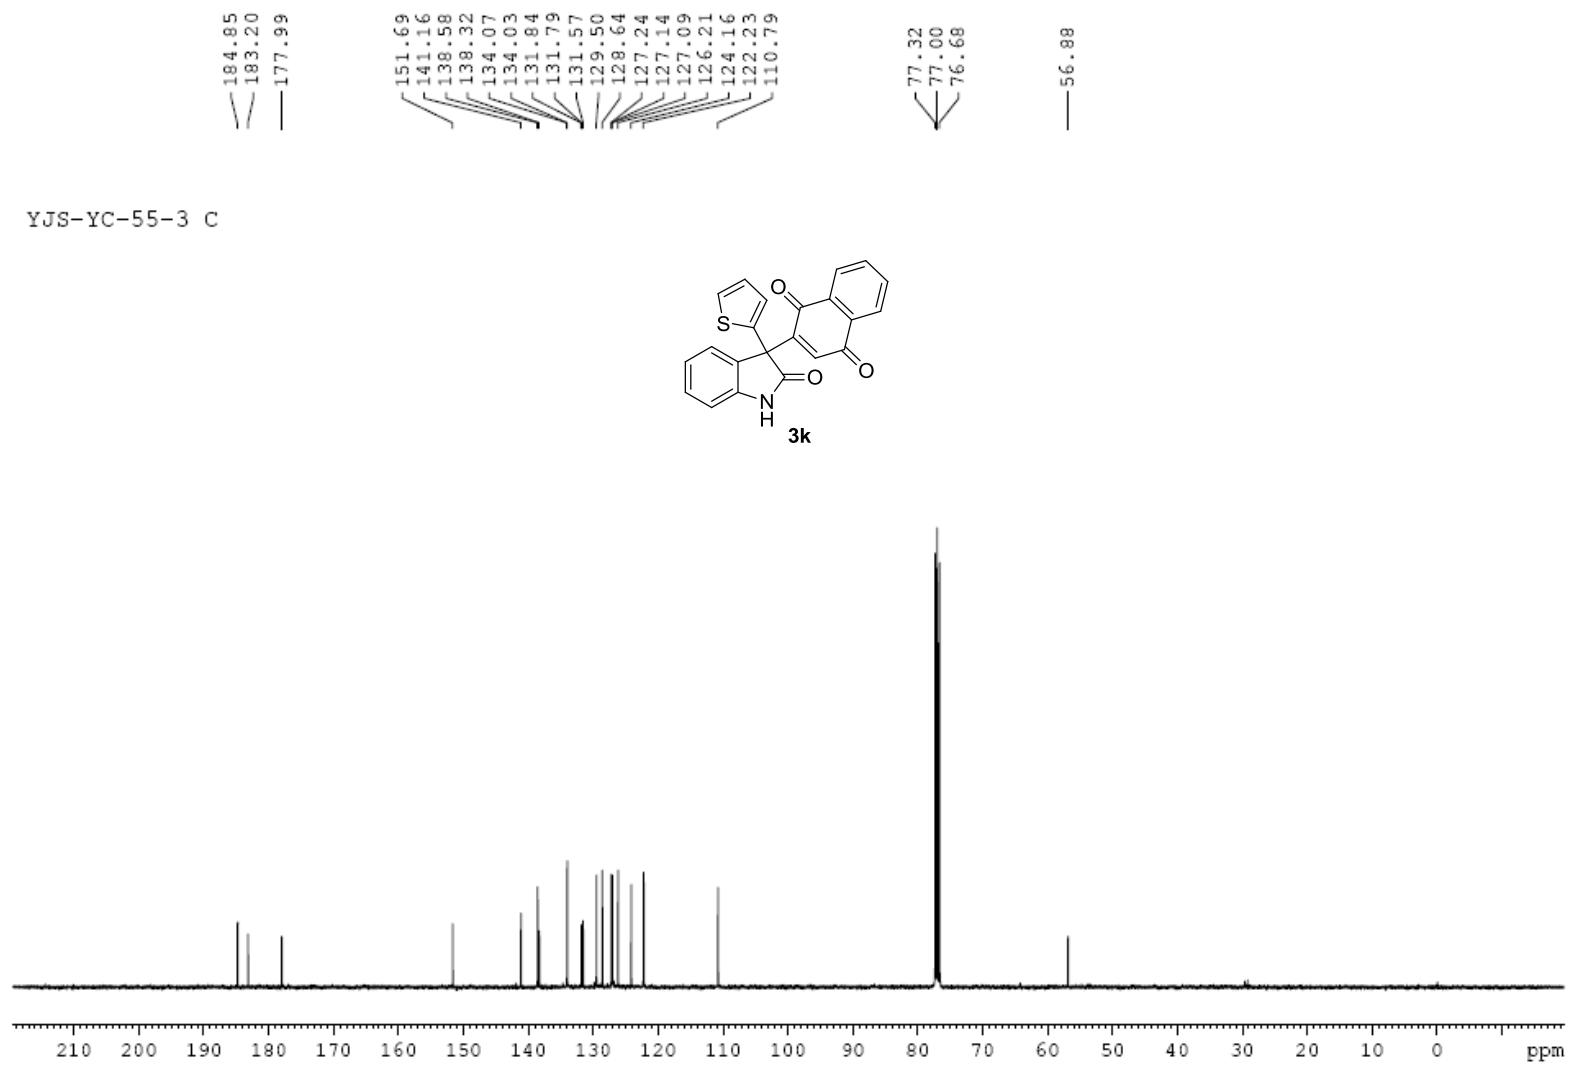

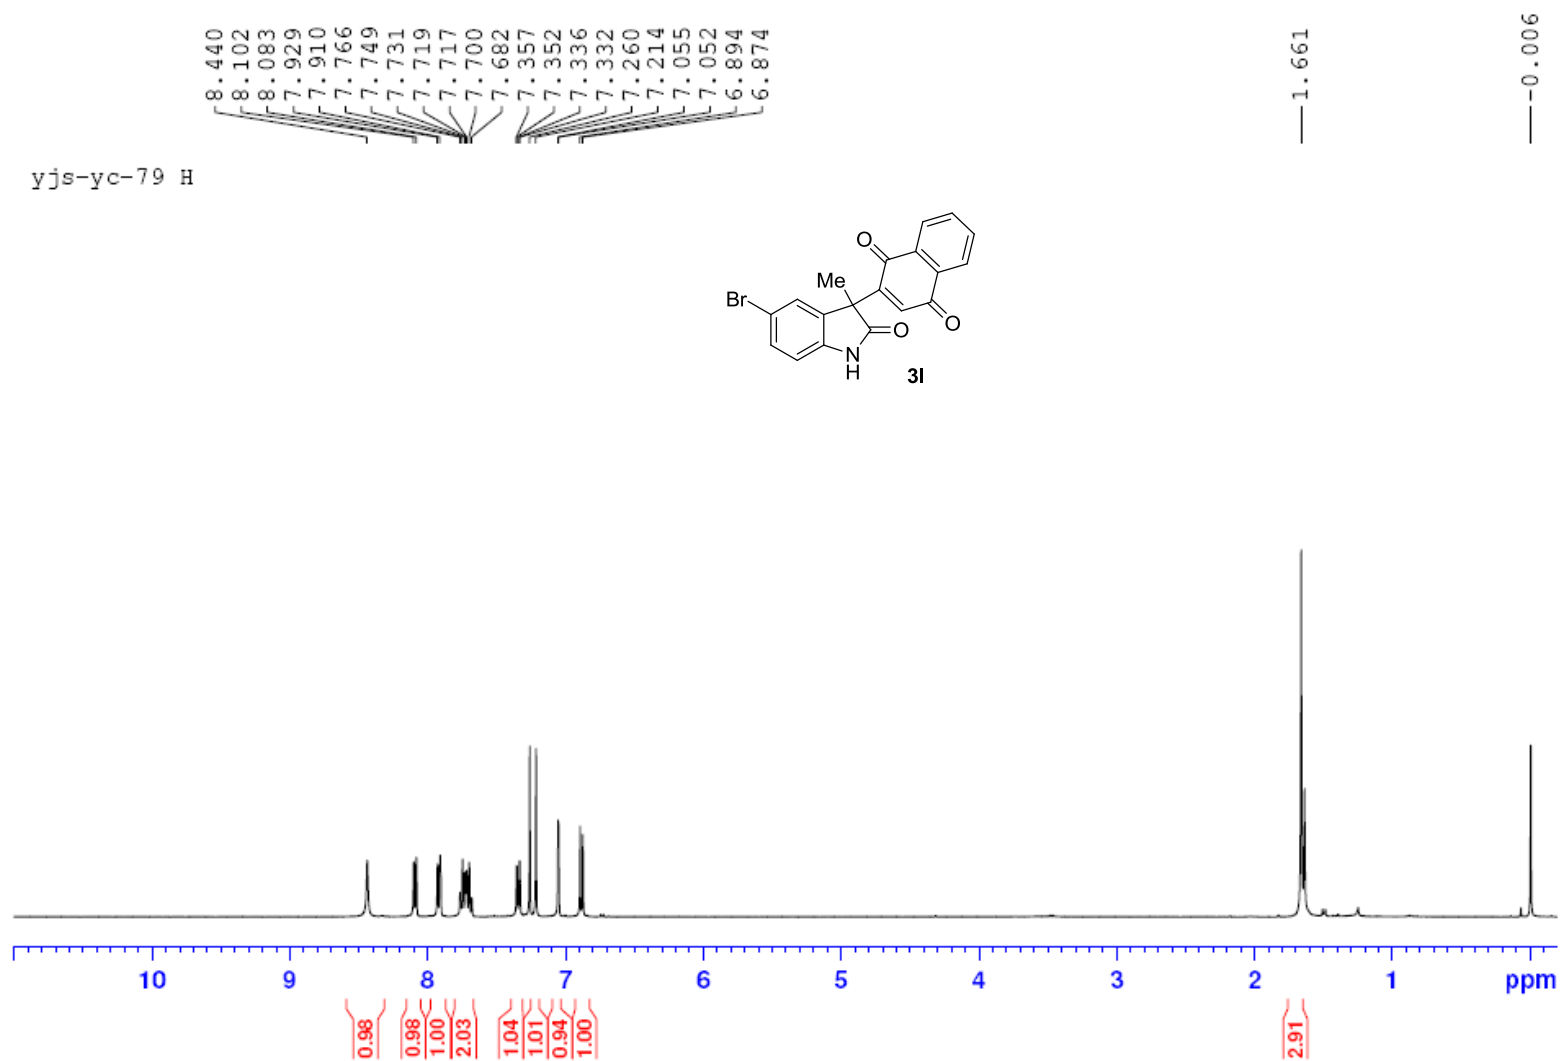

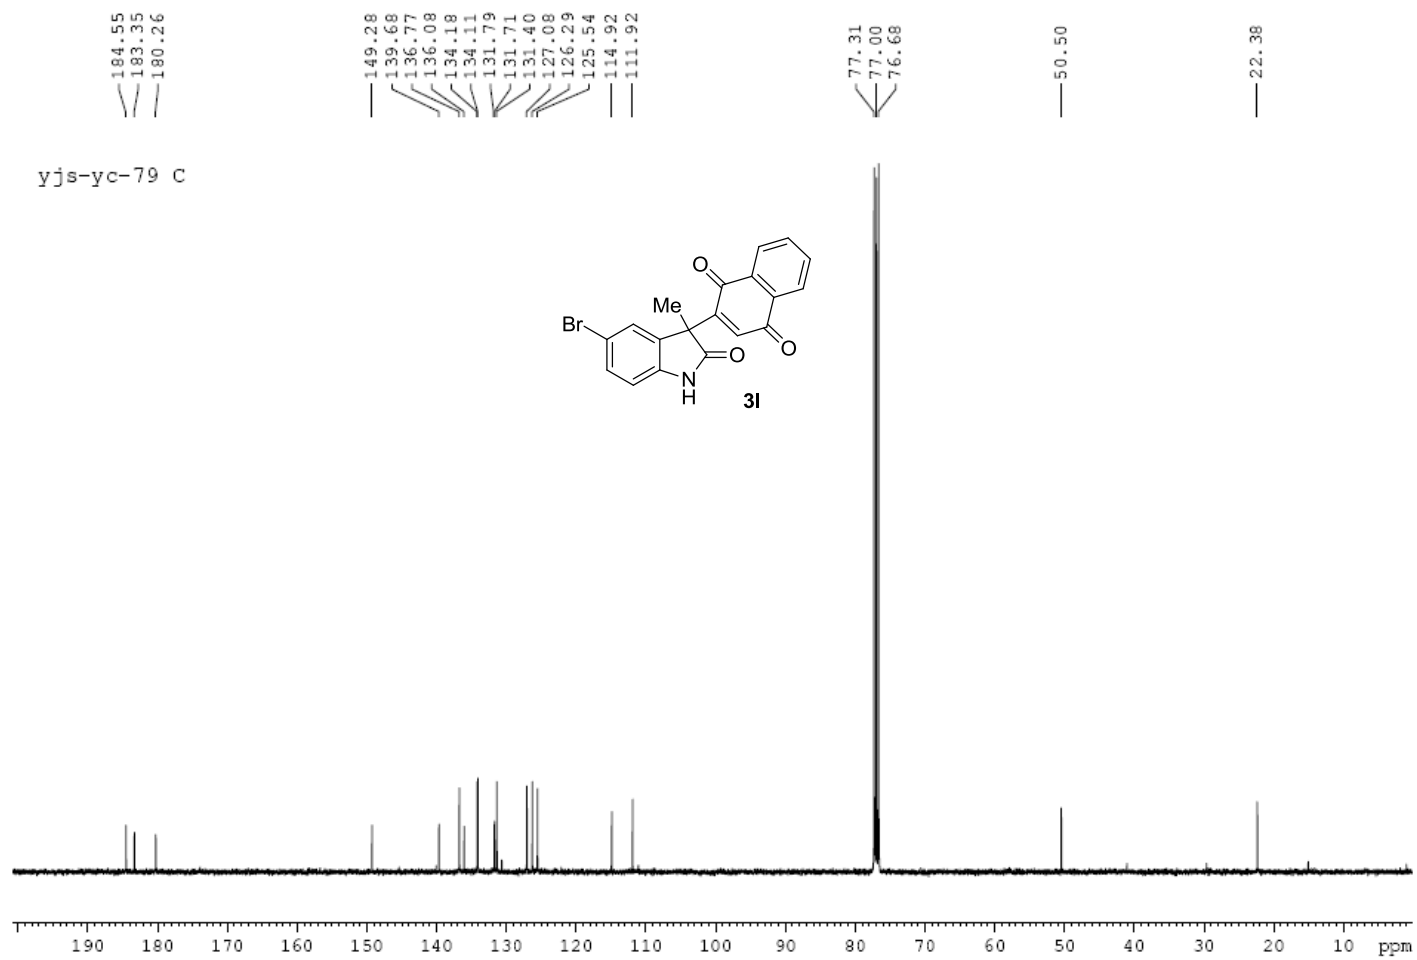

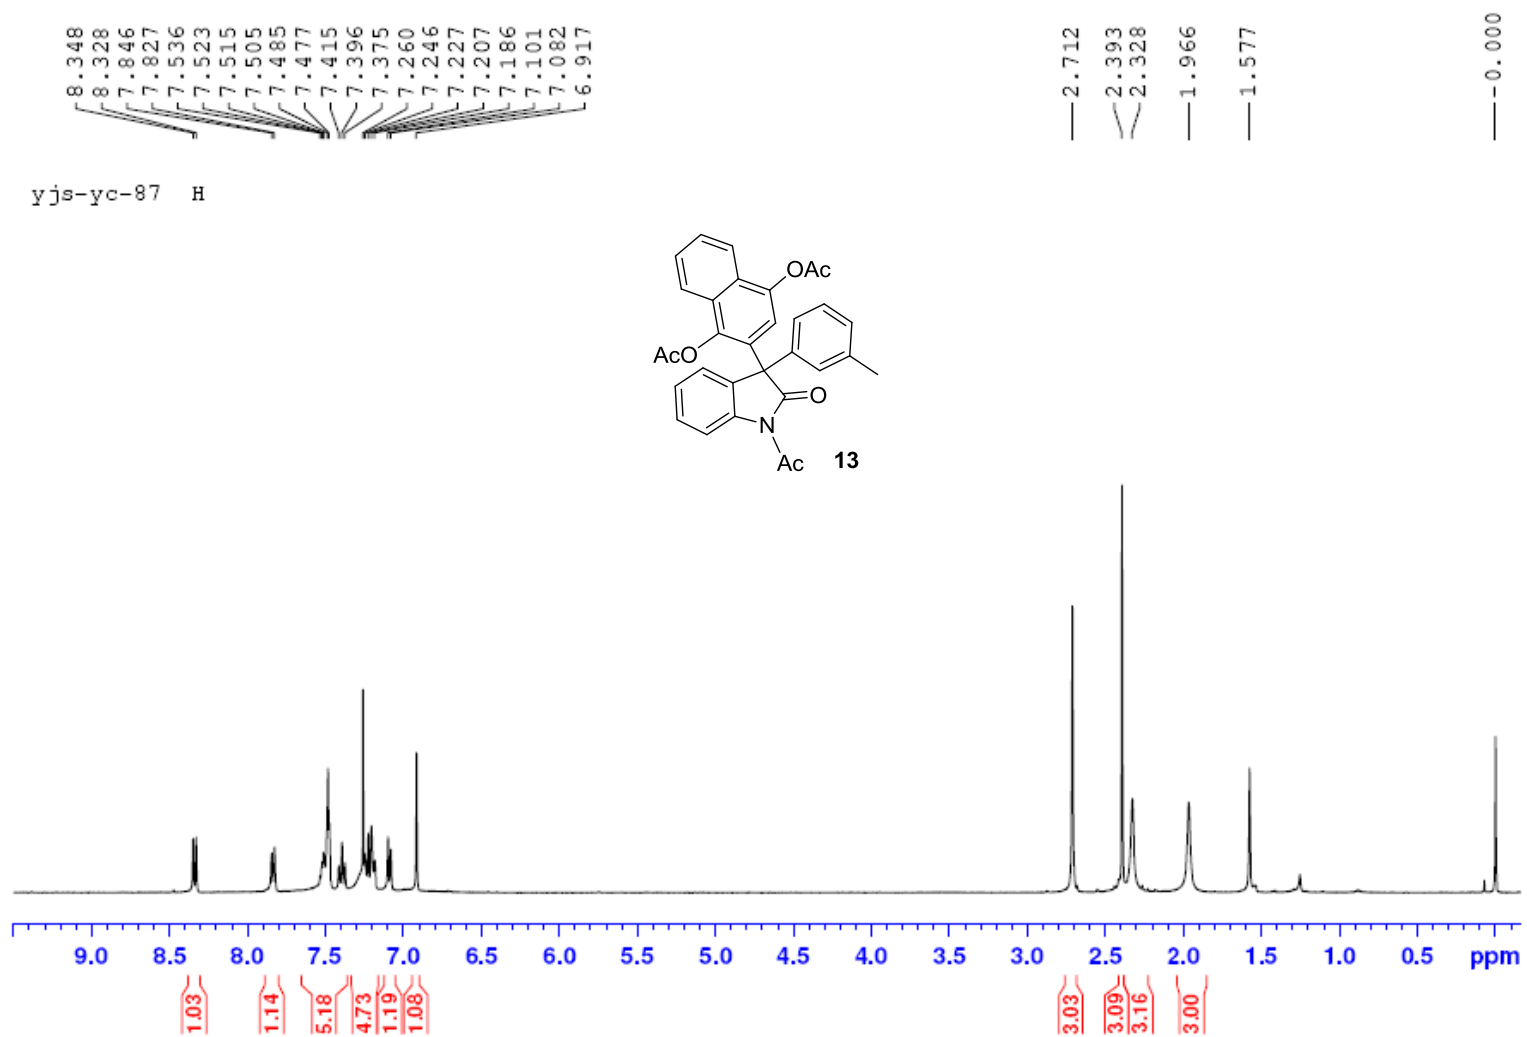

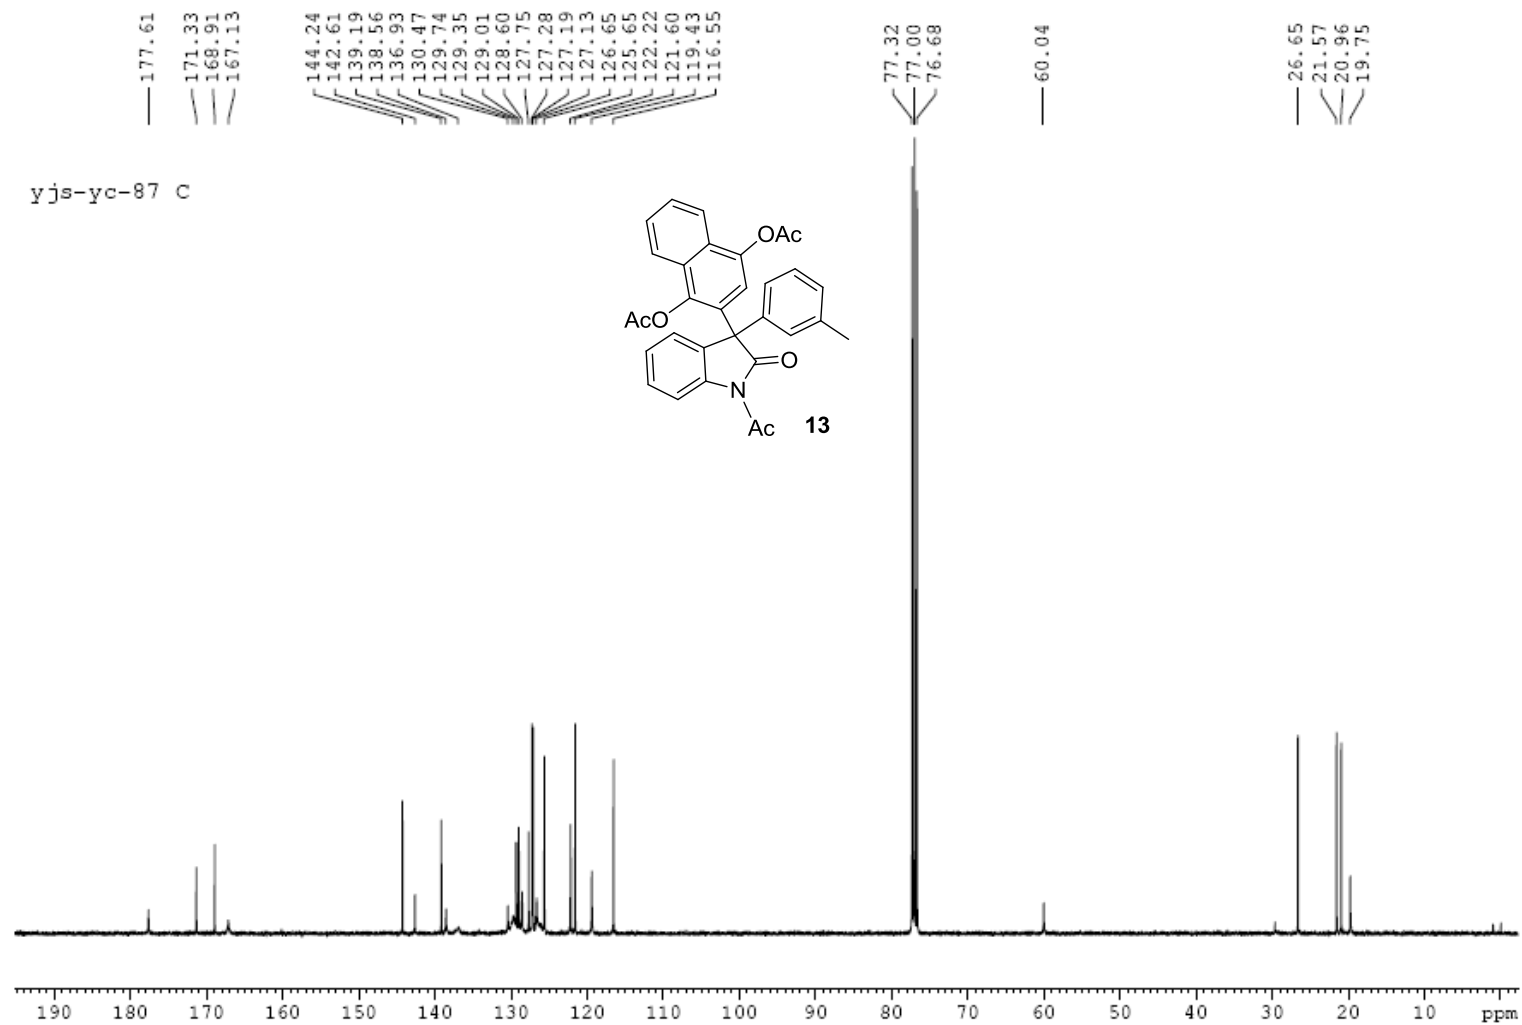

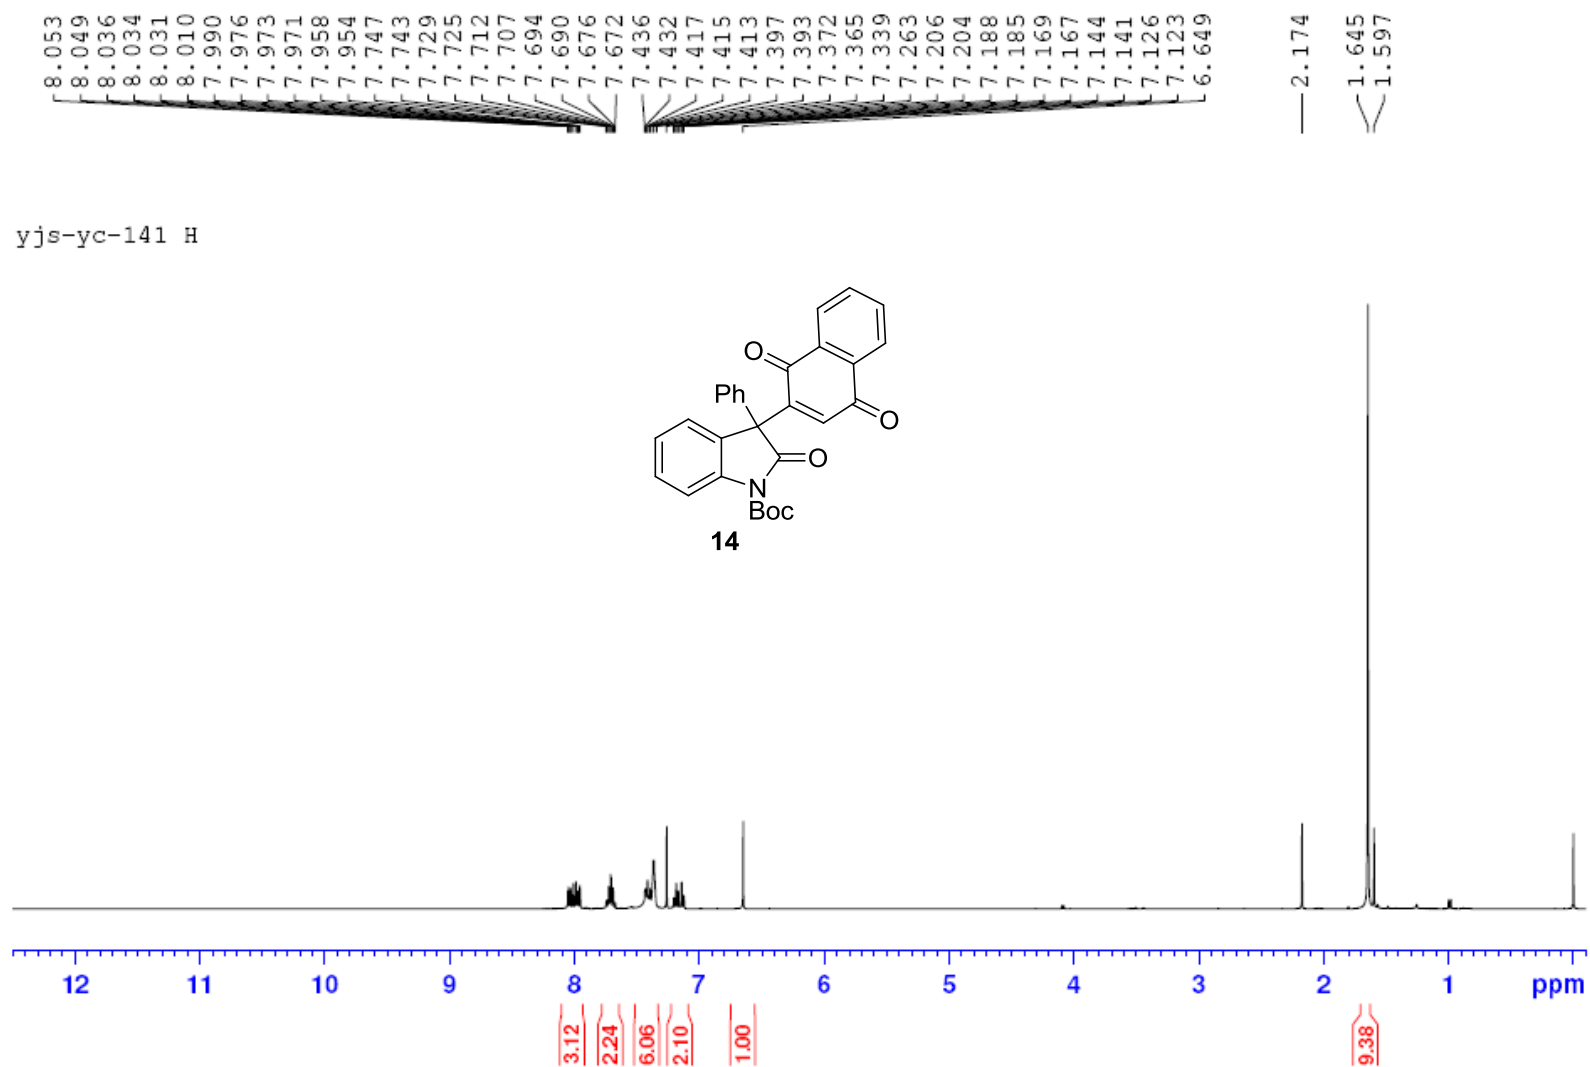



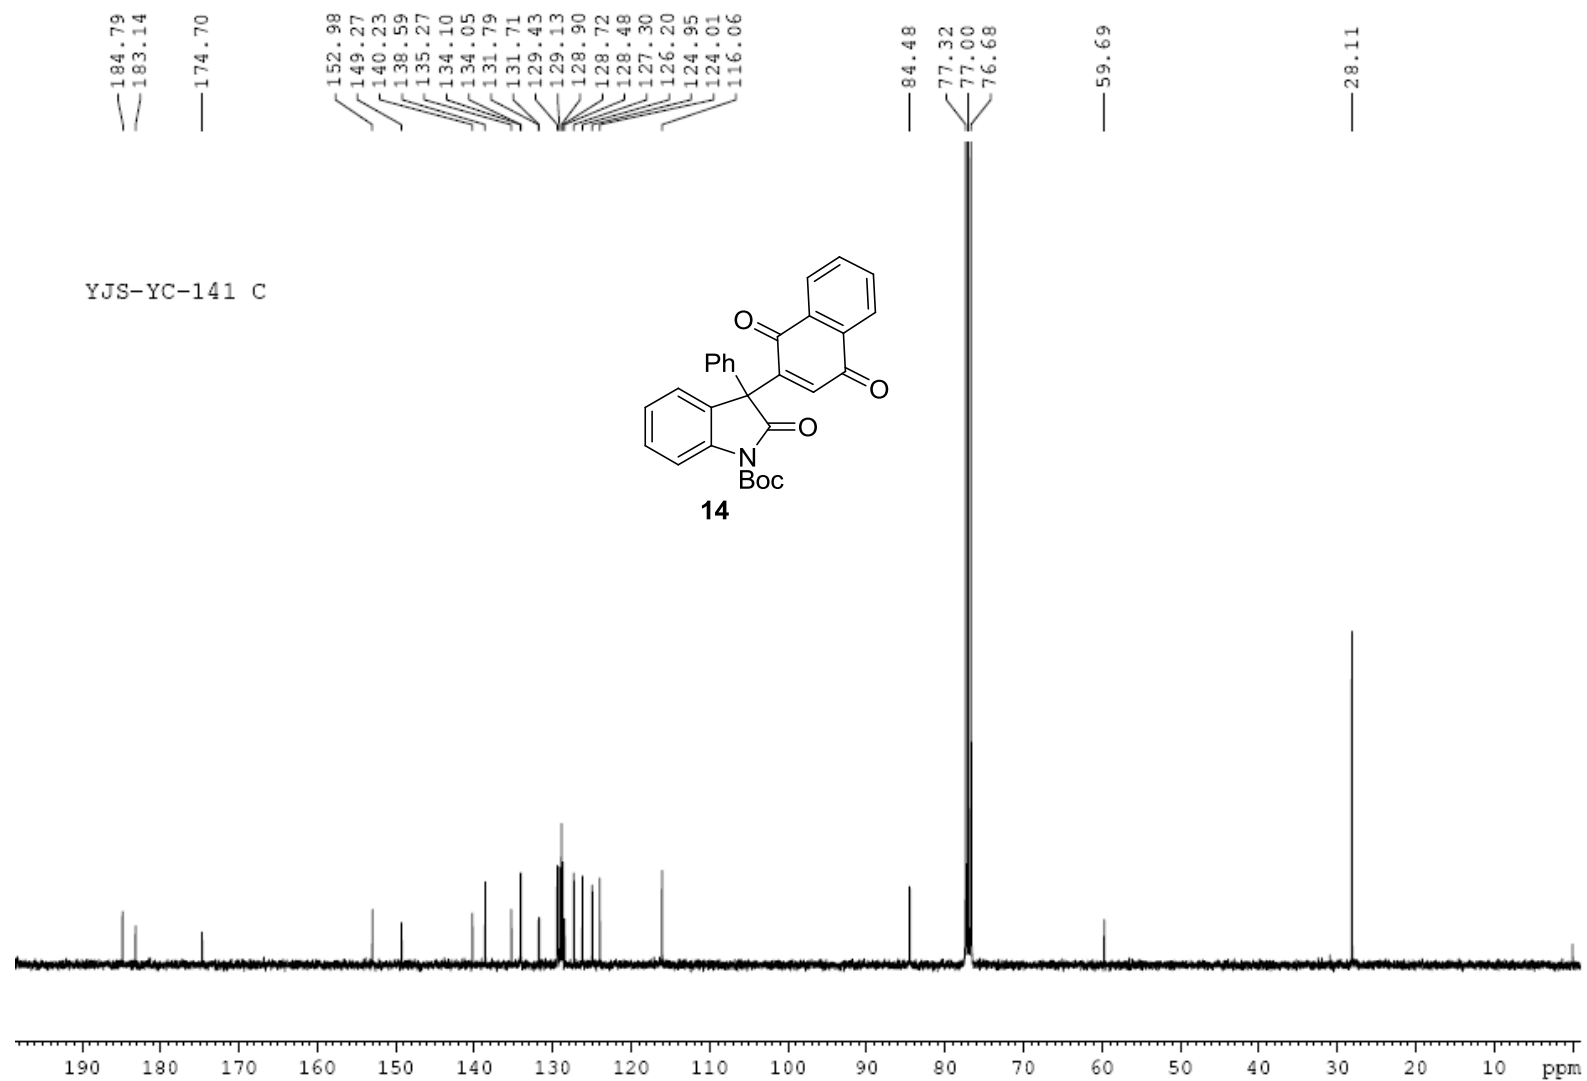

**339 yjs-yb-24-Br-ODH-rac-80/20-230-1.0-1**

Sample Name: yjs-yb-24-Br-ODH-rac-80/20-230-1.0-1 Injection Volume: 20.0  
 Vial Number: 668 Channel: UV\_VIS\_1  
 Sample Type: standard Wavelength: 230  
 Control Program: YJS Bandwidth: n.a.  
 Quantif. Method: YJS Dilution Factor: 1.0000  
 Recording Time: 2012-5-23 13:31 Sample Weight: 1.0000  
 Run Time (min): 32.76 Sample Amount: 1.0000

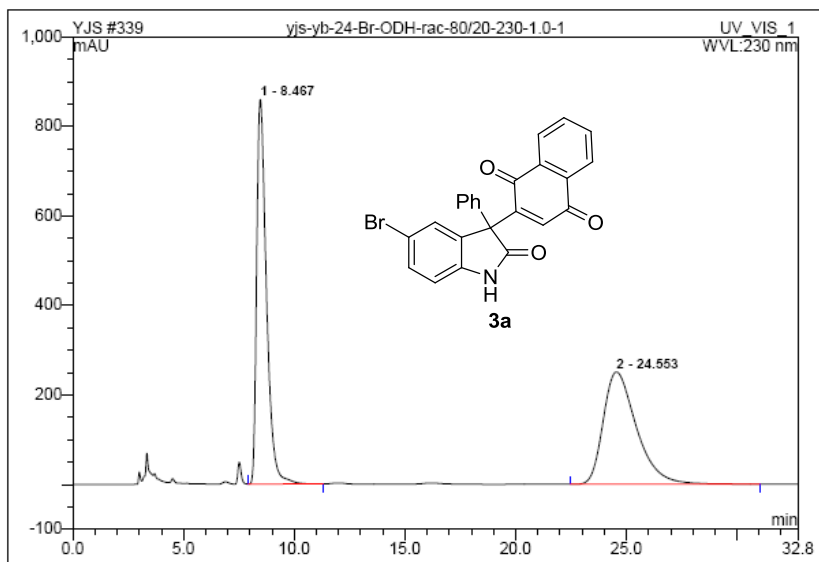

| No.    | Ret. Time<br>min | Peak Name | Height<br>mAU | Area<br>mAU*min | Rel. Area<br>% | Amount | Type |
|--------|------------------|-----------|---------------|-----------------|----------------|--------|------|
| 1      | 8.47             | n.a.      | 859.086       | 439.318         | 50.12          | n.a.   | BMB  |
| 2      | 24.55            | n.a.      | 251.030       | 437.181         | 49.88          | n.a.   | BMB  |
| Total: |                  |           | 1110.116      | 876.500         | 100.00         | 0.000  |      |

**227 YJS-YB-142-ODH-ASY-80/20-230-1.0-1**

Sample Name: YJS-YB-142-ODH-ASY-80/20-230-1.0-1 Injection Volume: 20.0  
 Vial Number: 552 Channel: UV\_VIS\_1  
 Sample Type: standard Wavelength: 230  
 Control Program: YJS Bandwidth: n.a.  
 Quantif. Method: YJS Dilution Factor: 1.0000  
 Recording Time: 2012-4-3 18:48 Sample Weight: 1.0000  
 Run Time (min): 34.65 Sample Amount: 1.0000

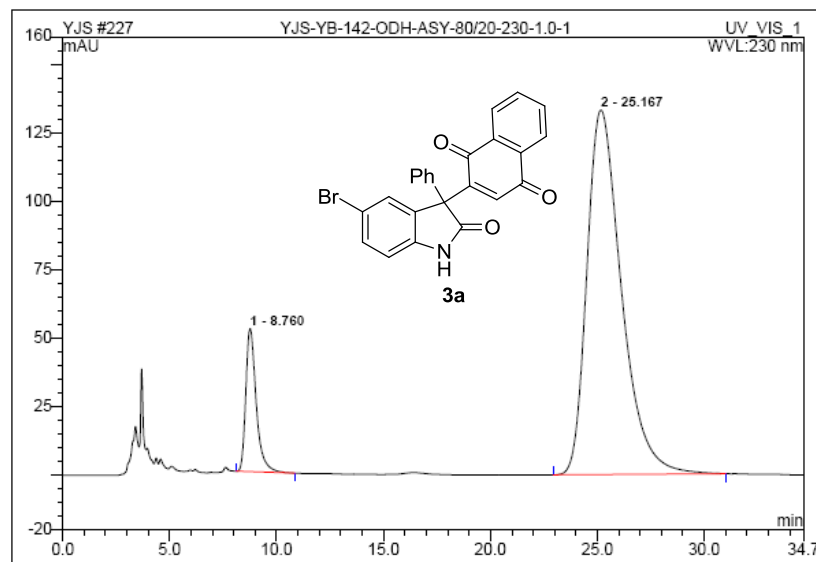

| No.    | Ret. Time<br>min | Peak Name | Height<br>mAU | Area<br>mAU*min | Rel. Area<br>% | Amount | Type |
|--------|------------------|-----------|---------------|-----------------|----------------|--------|------|
| 1      | 8.76             | n.a.      | 52.253        | 29.519          | 10.59          | n.a.   | BMB  |
| 2      | 25.17            | n.a.      | 133.058       | 249.125         | 89.41          | n.a.   | BMB  |
| Total: |                  |           | 185.311       | 278.645         | 100.00         | 0.000  |      |

**234 YJS-YB-139-3-ODH-RAC-80/20-230-1.0-1**

|                  |                                      |                   |          |
|------------------|--------------------------------------|-------------------|----------|
| Sample Name:     | YJS-YB-139-3-ODH-RAC-80/20-230-1.0-1 | Injection Volume: | 20.0     |
| Vial Number:     | 559                                  | Channel:          | UV_VIS_1 |
| Sample Type:     | standard                             | Wavelength:       | 230      |
| Control Program: | YJS                                  | Bandwidth:        | n.a.     |
| Quantif. Method: | YJS                                  | Dilution Factor:  | 1.0000   |
| Recording Time:  | 2012-4-6 13:06                       | Sample Weight:    | 1.0000   |
| Run Time (min):  | 27.58                                | Sample Amount:    | 1.0000   |

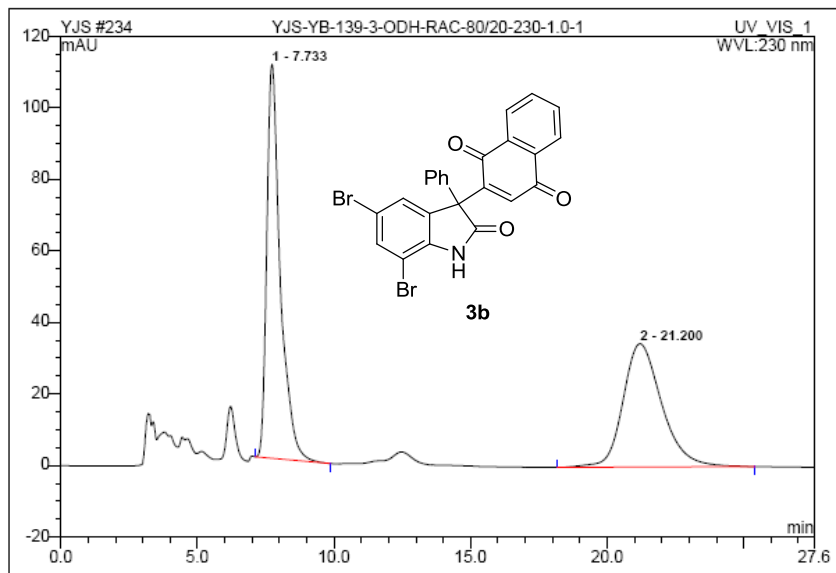

| No.    | Ret.Time<br>min | Peak Name | Height<br>mAU | Area<br>mAU*min | Rel.Area<br>% | Amount | Type |
|--------|-----------------|-----------|---------------|-----------------|---------------|--------|------|
| 1      | 7.73            | n.a.      | 110.100       | 63.136          | 52.64         | n.a.   | BMB  |
| 2      | 21.20           | n.a.      | 34.464        | 56.808          | 47.36         | n.a.   | BMB  |
| Total: |                 |           | 144.564       | 119.944         | 100.00        | 0.000  |      |

**296 YJS-YC-55-1-ODH-ASY-80/20-230-1.0-1**

|                  |                                     |                   |          |
|------------------|-------------------------------------|-------------------|----------|
| Sample Name:     | YJS-YC-55-1-ODH-ASY-80/20-230-1.0-1 | Injection Volume: | 20.0     |
| Vial Number:     | 624                                 | Channel:          | UV_VIS_1 |
| Sample Type:     | standard                            | Wavelength:       | 230      |
| Control Program: | YJS                                 | Bandwidth:        | n.a.     |
| Quantif. Method: | YJS                                 | Dilution Factor:  | 1.0000   |
| Recording Time:  | 2012-5-4 16:00                      | Sample Weight:    | 1.0000   |
| Run Time (min):  | 28.78                               | Sample Amount:    | 1.0000   |

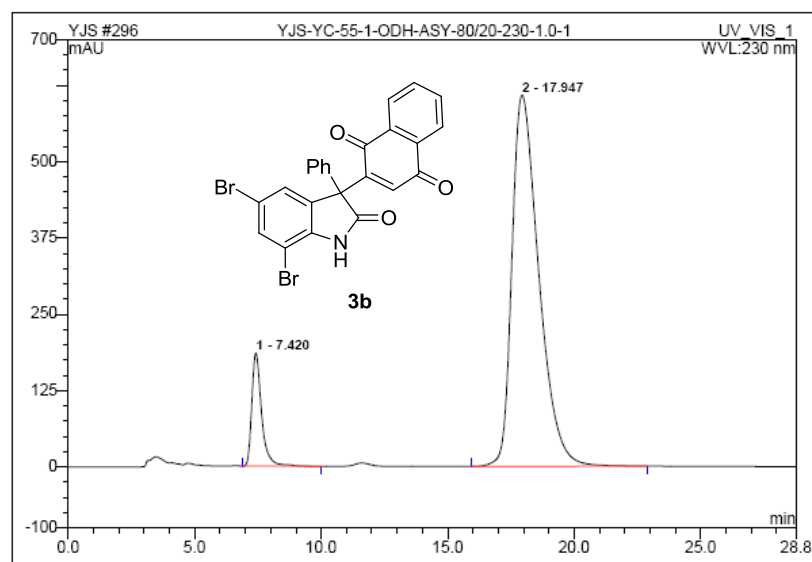

| No.    | Ret.Time<br>min | Peak Name | Height<br>mAU | Area<br>mAU*min | Rel.Area<br>% | Amount | Type |
|--------|-----------------|-----------|---------------|-----------------|---------------|--------|------|
| 1      | 7.42            | n.a.      | 185.168       | 83.590          | 10.05         | n.a.   | BMB  |
| 2      | 17.95           | n.a.      | 607.707       | 748.037         | 89.95         | n.a.   | BMB  |
| Total: |                 |           | 792.875       | 831.628         | 100.00        | 0.000  |      |

**338 yjs-yb-24-cl-ODH-RAC-80/20-254-1.0-1**

|                  |                                      |                   |          |
|------------------|--------------------------------------|-------------------|----------|
| Sample Name:     | yjs-yb-24-cl-ODH-RAC-80/20-254-1.0-1 | Injection Volume: | 20.0     |
| Vial Number:     | 666                                  | Channel:          | UV_VIS_1 |
| Sample Type:     | standard                             | Wavelength:       | 254      |
| Control Program: | YJS                                  | Bandwidth:        | n.a.     |
| Quantif. Method: | YJS                                  | Dilution Factor:  | 1.0000   |
| Recording Time:  | 2012-5-23 12:12                      | Sample Weight:    | 1.0000   |
| Run Time (min):  | 33.24                                | Sample Amount:    | 1.0000   |

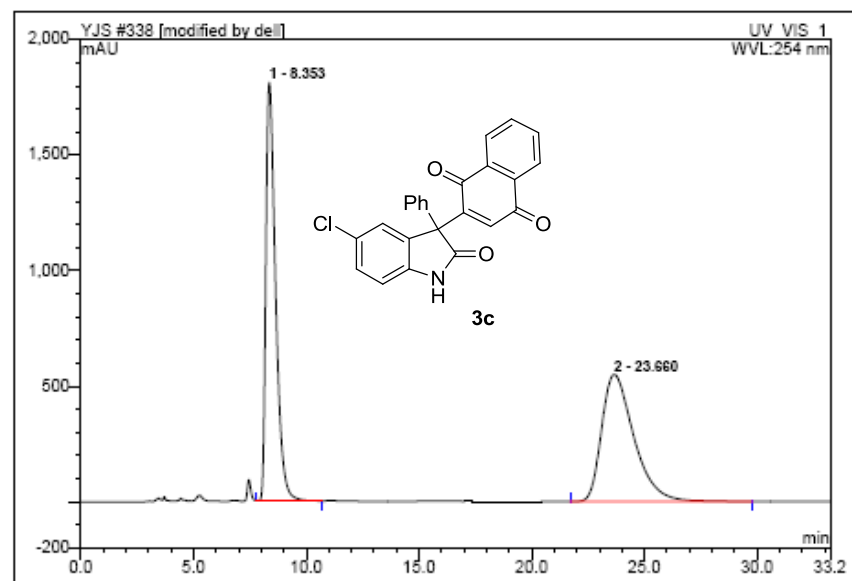

| No.    | Ret. Time<br>min | Peak Name | Height<br>mAU | Area<br>mAU*min | Rel. Area<br>% | Amount | Type |
|--------|------------------|-----------|---------------|-----------------|----------------|--------|------|
| 1      | 8.35             | n.a.      | 1810.885      | 904.508         | 49.71          | n.a.   | MB*  |
| 2      | 23.66            | n.a.      | 550.209       | 914.951         | 50.29          | n.a.   | BMB  |
| Total: |                  |           | 2361.094      | 1819.459        | 100.00         | 0.000  |      |

**314 YJS-YC-55-2-ODH-ASY-80/20-254-1.0-1**

|                  |                                     |                   |          |
|------------------|-------------------------------------|-------------------|----------|
| Sample Name:     | YJS-YC-55-2-ODH-ASY-80/20-254-1.0-1 | Injection Volume: | 20.0     |
| Vial Number:     | 642                                 | Channel:          | UV_VIS_1 |
| Sample Type:     | standard                            | Wavelength:       | 254      |
| Control Program: | YJS                                 | Bandwidth:        | n.a.     |
| Quantif. Method: | YJS                                 | Dilution Factor:  | 1.0000   |
| Recording Time:  | 2012-5-9 12:09                      | Sample Weight:    | 1.0000   |
| Run Time (min):  | 36.20                               | Sample Amount:    | 1.0000   |

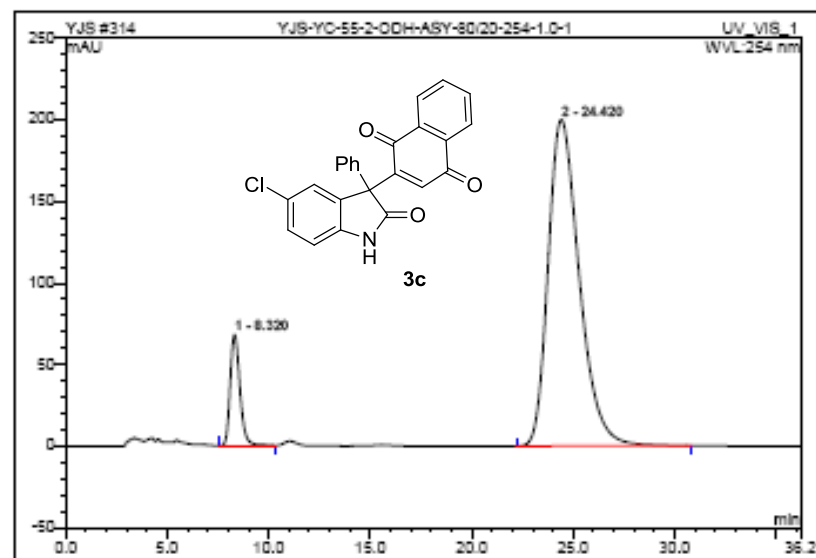

| No.    | Ret. Time<br>min | Peak Name | Height<br>mAU | Area<br>mAU*min | Rel. Area<br>% | Amount | Type |
|--------|------------------|-----------|---------------|-----------------|----------------|--------|------|
| 1      | 8.32             | n.a.      | 67.893        | 37.694          | 9.58           | n.a.   | BMB  |
| 2      | 24.42            | n.a.      | 200.217       | 355.695         | 90.42          | n.a.   | BMB  |
| Total: |                  |           | 268.110       | 393.388         | 100.00         | 0.000  |      |

**278 YJS-YB-24-F-ODH-rac-80/20-230-1.0-1**

|                  |                                     |                   |          |
|------------------|-------------------------------------|-------------------|----------|
| Sample Name:     | YJS-YB-24-F-ODH-rac-80/20-230-1.0-1 | Injection Volume: | 20.0     |
| Vial Number:     | 605                                 | Channel:          | UV_VIS_1 |
| Sample Type:     | standard                            | Wavelength:       | 230      |
| Control Program: | YJS                                 | Bandwidth:        | n.a.     |
| Quantif. Method: | YJS                                 | Dilution Factor:  | 1.0000   |
| Recording Time:  | 2012-4-22 13:02                     | Sample Weight:    | 1.0000   |
| Run Time (min):  | 34.75                               | Sample Amount:    | 1.0000   |

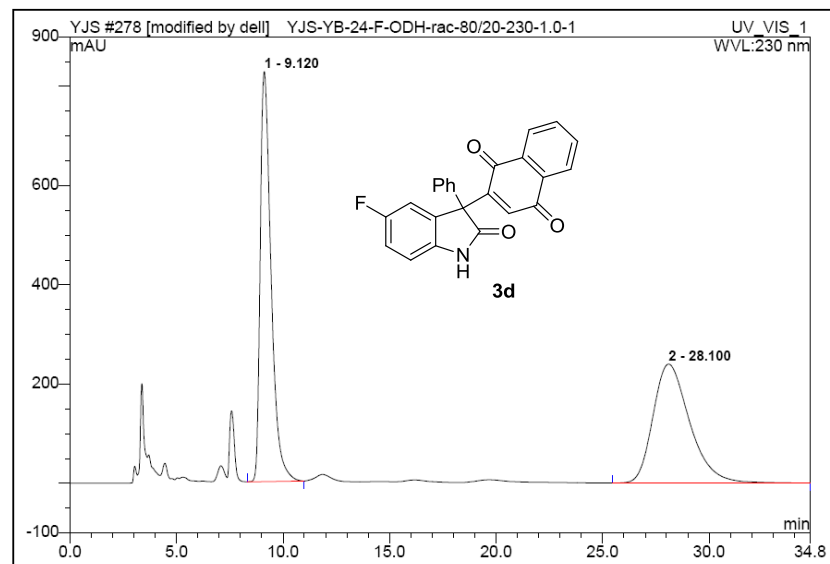

| No.    | Ret. Time<br>min | Peak Name | Height<br>mAU | Area<br>mAU*min | Rel. Area<br>% | Amount | Type |
|--------|------------------|-----------|---------------|-----------------|----------------|--------|------|
| 1      | 9.12             | n.a.      | 826.661       | 488.099         | 50.52          | n.a.   | BMB* |
| 2      | 28.10            | n.a.      | 239.696       | 478.028         | 49.48          | n.a.   | BMB  |
| Total: |                  |           | 1066.357      | 966.127         | 100.00         | 0.000  |      |

**327 YJS-YC-75-ODH-ASY-80/20-230-1.0-1**

|                  |                                   |                   |          |
|------------------|-----------------------------------|-------------------|----------|
| Sample Name:     | YJS-YC-75-ODH-ASY-80/20-230-1.0-1 | Injection Volume: | 20.0     |
| Vial Number:     | 655                               | Channel:          | UV_VIS_1 |
| Sample Type:     | standard                          | Wavelength:       | 230      |
| Control Program: | YJS                               | Bandwidth:        | n.a.     |
| Quantif. Method: | YJS                               | Dilution Factor:  | 1.0000   |
| Recording Time:  | 2012-5-16 17:42                   | Sample Weight:    | 1.0000   |
| Run Time (min):  | 43.02                             | Sample Amount:    | 1.0000   |

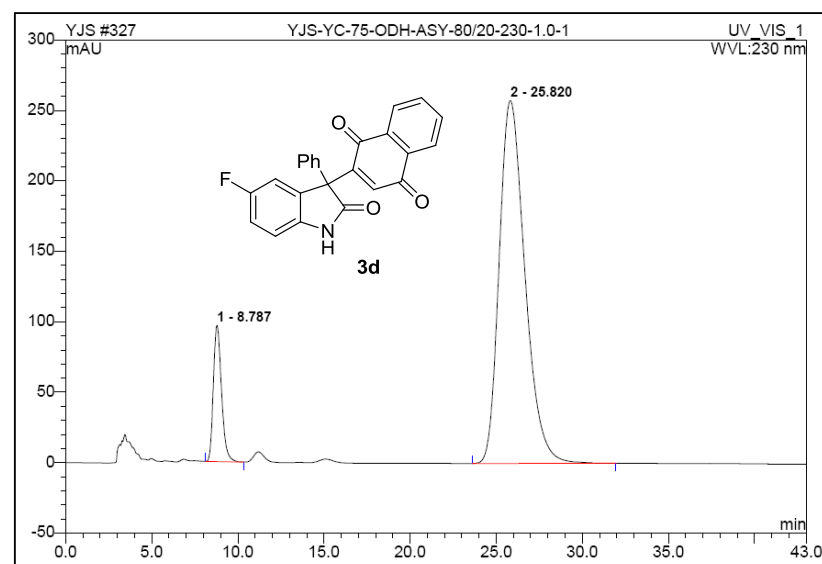

| No.    | Ret. Time<br>min | Peak Name | Height<br>mAU | Area<br>mAU*min | Rel. Area<br>% | Amount | Type |
|--------|------------------|-----------|---------------|-----------------|----------------|--------|------|
| 1      | 8.79             | n.a.      | 96.623        | 53.270          | 10.68          | n.a.   | BMB  |
| 2      | 25.82            | n.a.      | 257.477       | 445.444         | 89.32          | n.a.   | BMB  |
| Total: |                  |           | 354.100       | 498.714         | 100.00         | 0.000  |      |

**231 YJS-YB-135-4-ODH-ASY-80/20-230-1.0-1**

|                  |                                      |                   |          |
|------------------|--------------------------------------|-------------------|----------|
| Sample Name:     | YJS-YB-135-4-ODH-ASY-80/20-230-1.0-1 | Injection Volume: | 20.0     |
| Vial Number:     | 556                                  | Channel:          | UV_VIS_1 |
| Sample Type:     | standard                             | Wavelength:       | 230      |
| Control Program: | YJS                                  | Bandwidth:        | n.a.     |
| Quantif. Method: | YJS                                  | Dilution Factor:  | 1.0000   |
| Recording Time:  | 2012-4-6 11:31                       | Sample Weight:    | 1.0000   |
| Run Time (min):  | 29.70                                | Sample Amount:    | 1.0000   |

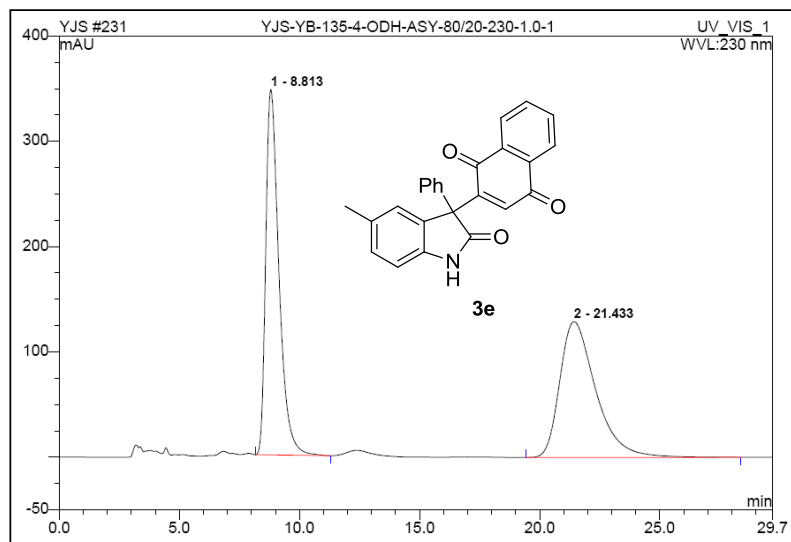

| No.    | Ret.Time<br>min | Peak Name | Height<br>mAU | Area<br>mAU*min | Rel.Area<br>% | Amount | Type |
|--------|-----------------|-----------|---------------|-----------------|---------------|--------|------|
| 1      | 8.81            | n.a.      | 347.033       | 220.667         | 49.63         | n.a.   | BMB  |
| 2      | 21.43           | n.a.      | 128.954       | 223.939         | 50.37         | n.a.   | BMB  |
| Total: |                 |           | 475.987       | 444.606         | 100.00        | 0.000  |      |

**317 YJS-YC-63-ODH-ASY-80/20-230-1.0-1**

|                  |                                   |                   |          |
|------------------|-----------------------------------|-------------------|----------|
| Sample Name:     | YJS-YC-63-ODH-ASY-80/20-230-1.0-1 | Injection Volume: | 20.0     |
| Vial Number:     | 645                               | Channel:          | UV_VIS_1 |
| Sample Type:     | standard                          | Wavelength:       | 230      |
| Control Program: | YJS                               | Bandwidth:        | n.a.     |
| Quantif. Method: | YJS                               | Dilution Factor:  | 1.0000   |
| Recording Time:  | 2012-5-12 15:31                   | Sample Weight:    | 1.0000   |
| Run Time (min):  | 27.98                             | Sample Amount:    | 1.0000   |

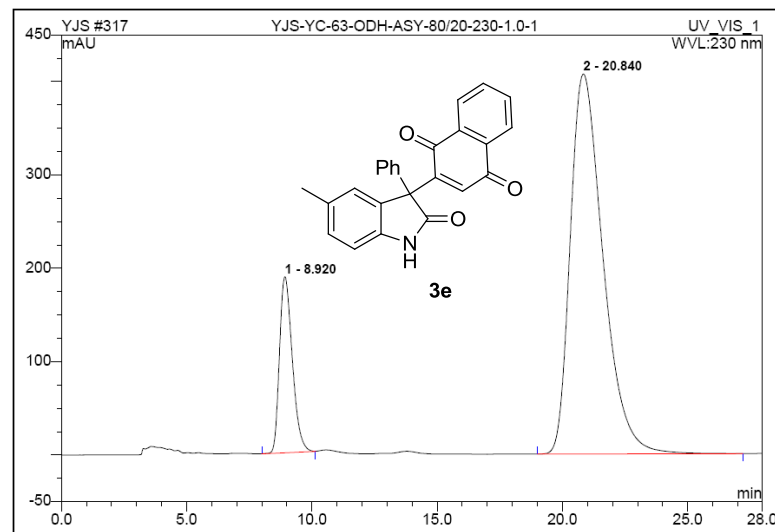

| No.    | Ret.Time<br>min | Peak Name | Height<br>mAU | Area<br>mAU*min | Rel.Area<br>% | Amount | Type |
|--------|-----------------|-----------|---------------|-----------------|---------------|--------|------|
| 1      | 8.92            | n.a.      | 188.580       | 111.780         | 15.34         | n.a.   | BMB  |
| 2      | 20.84           | n.a.      | 407.205       | 616.910         | 84.66         | n.a.   | BMB  |
| Total: |                 |           | 595.785       | 728.690         | 100.00        | 0.000  |      |

**294 YJS-YC-27-3-ODH-rac-80/20-230-1.0-1**

Sample Name: YJS-YC-27-3-ODH-rac-80/20-230-1.0-1 Injection Volume: 20.0  
 Vial Number: 621 Channel: UV\_VIS\_1  
 Sample Type: standard Wavelength: 230  
 Control Program: YJS Bandwidth: n.a.  
 Quantif. Method: YJS Dilution Factor: 1.0000  
 Recording Time: 2012-5-2 19:44 Sample Weight: 1.0000  
 Run Time (min): 39.51 Sample Amount: 1.0000

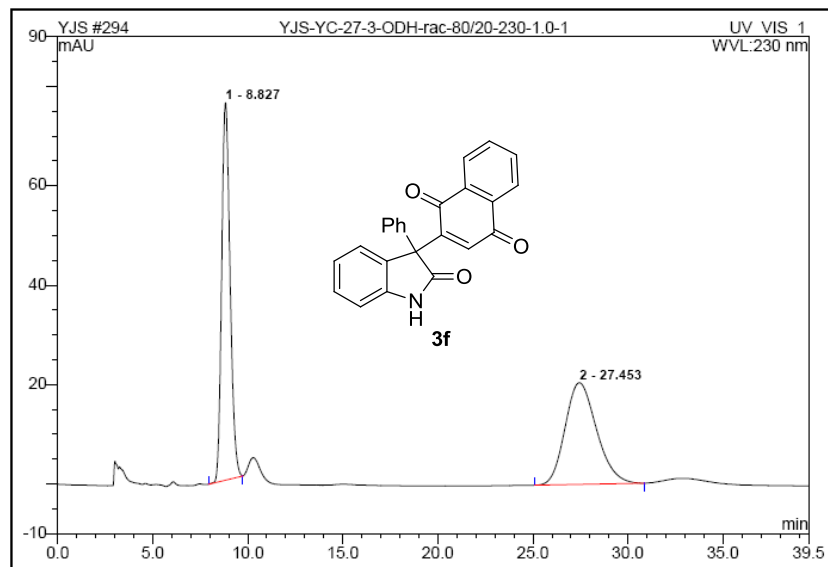

| No.    | Ret.Time min | Peak Name | Height mAU | Area mAU*min | Rel.Area % | Amount | Type |
|--------|--------------|-----------|------------|--------------|------------|--------|------|
| 1      | 8.83         | n.a.      | 75.941     | 38.955       | 49.79      | n.a.   | BMB  |
| 2      | 27.45        | n.a.      | 20.460     | 39.280       | 50.21      | n.a.   | BMB  |
| Total: |              |           | 96.401     | 78.235       | 100.00     | 0.000  |      |

**321 YJS-YC-60-ODH-ASY-80/20-230-1.0-1**

Sample Name: YJS-YC-60-ODH-ASY-80/20-230-1.0-1 Injection Volume: 20.0  
 Vial Number: 649 Channel: UV\_VIS\_1  
 Sample Type: standard Wavelength: 230  
 Control Program: YJS Bandwidth: n.a.  
 Quantif. Method: YJS Dilution Factor: 1.0000  
 Recording Time: 2012-5-12 17:46 Sample Weight: 1.0000  
 Run Time (min): 37.86 Sample Amount: 1.0000

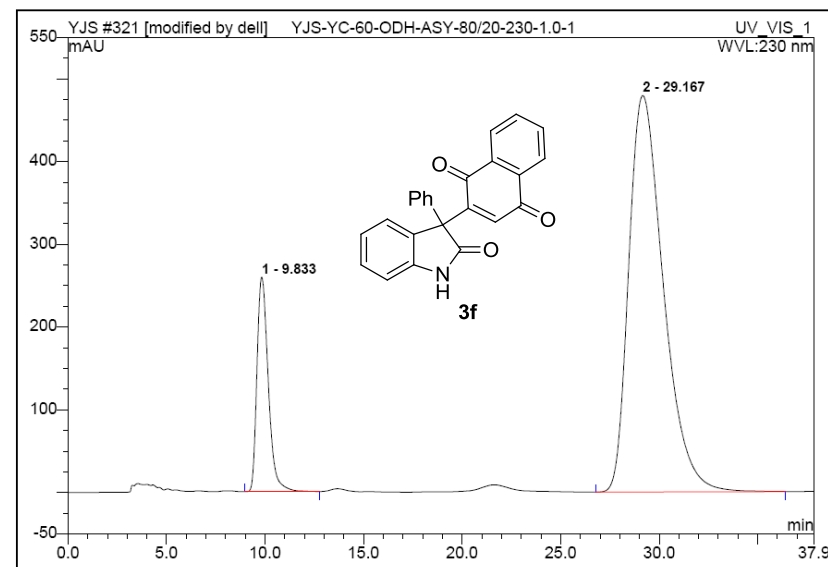

| No.    | Ret.Time min | Peak Name | Height mAU | Area mAU*min | Rel.Area % | Amount | Type |
|--------|--------------|-----------|------------|--------------|------------|--------|------|
| 1      | 9.83         | n.a.      | 259.155    | 173.133      | 15.07      | n.a.   | BMB  |
| 2      | 29.17        | n.a.      | 479.137    | 975.796      | 84.93      | n.a.   | BMB  |
| Total: |              |           | 738.292    | 1148.930     | 100.00     | 0.000  |      |

**332 YJS-YC-43-1-ODH-RAC-80/20-254-1.0-1**

|                  |                                     |                   |          |
|------------------|-------------------------------------|-------------------|----------|
| Sample Name:     | YJS-YC-43-1-ODH-RAC-80/20-254-1.0-1 | Injection Volume: | 20.0     |
| Vial Number:     | 660                                 | Channel:          | UV_VIS_1 |
| Sample Type:     | standard                            | Wavelength:       | 254      |
| Control Program: | YJS                                 | Bandwidth:        | n.a.     |
| Quantif. Method: | YJS                                 | Dilution Factor:  | 1.0000   |
| Recording Time:  | 2012-5-16 20:14                     | Sample Weight:    | 1.0000   |
| Run Time (min):  | 22.66                               | Sample Amount:    | 1.0000   |

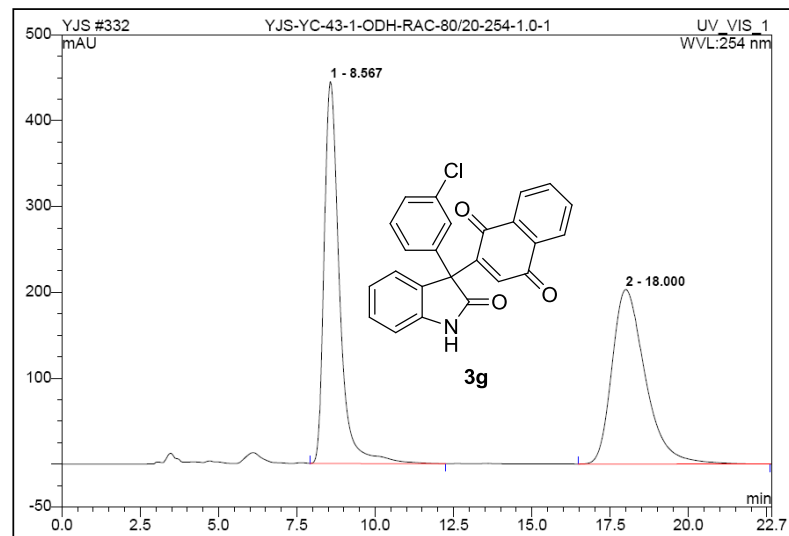

| No.    | Ret.Time<br>min | Peak Name | Height<br>mAU | Area<br>mAU*min | Rel.Area<br>% | Amount | Type |
|--------|-----------------|-----------|---------------|-----------------|---------------|--------|------|
| 1      | 8.57            | n.a.      | 444.818       | 251.840         | 50.16         | n.a.   | BMB  |
| 2      | 18.00           | n.a.      | 203.230       | 250.268         | 49.84         | n.a.   | BMB  |
| Total: |                 |           | 648.048       | 502.109         | 100.00        | 0.000  |      |

**322 YJS-YC-72-ODH-ASY-80/20-254-1.0-1**

|                  |                                   |                   |          |
|------------------|-----------------------------------|-------------------|----------|
| Sample Name:     | YJS-YC-72-ODH-ASY-80/20-254-1.0-1 | Injection Volume: | 20.0     |
| Vial Number:     | 650                               | Channel:          | UV_VIS_1 |
| Sample Type:     | standard                          | Wavelength:       | 254      |
| Control Program: | YJS                               | Bandwidth:        | n.a.     |
| Quantif. Method: | YJS                               | Dilution Factor:  | 1.0000   |
| Recording Time:  | 2012-5-12 18:30                   | Sample Weight:    | 1.0000   |
| Run Time (min):  | 26.70                             | Sample Amount:    | 1.0000   |

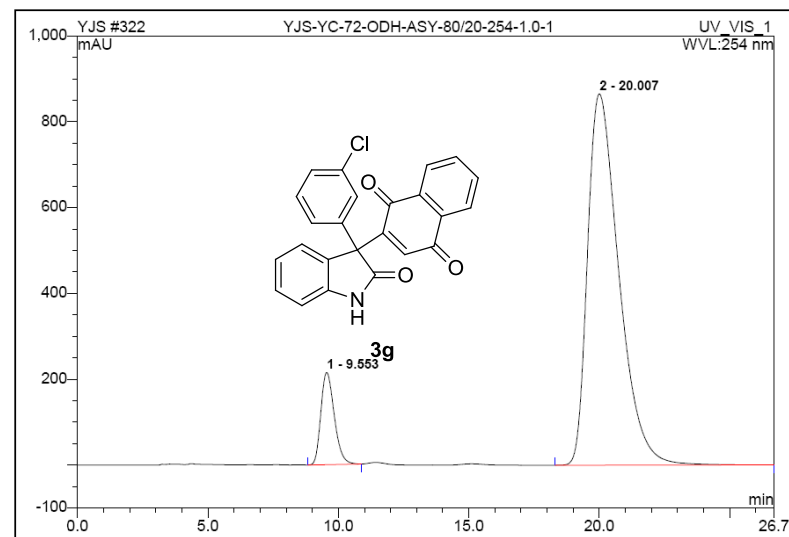

| No.    | Ret.Time<br>min | Peak Name | Height<br>mAU | Area<br>mAU*min | Rel.Area<br>% | Amount | Type |
|--------|-----------------|-----------|---------------|-----------------|---------------|--------|------|
| 1      | 9.55            | n.a.      | 214.667       | 128.257         | 9.64          | n.a.   | BMB  |
| 2      | 20.01           | n.a.      | 865.182       | 1201.694        | 90.36         | n.a.   | BMB  |
| Total: |                 |           | 1079.849      | 1329.952        | 100.00        | 0.000  |      |



**209 YJS-YB-133-1-RAC-ODH-80/20-230-1.0-1**

Sample Name: YJS-YB-133-1-RAC-ODH-80/20-230-1.0-1 Injection Volume: 20.0  
 Vial Number: 534 Channel: UV\_VIS\_1  
 Sample Type: standard Wavelength: 230  
 Control Program: YJS Bandwidth: n.a.  
 Quantif. Method: YJS Dilution Factor: 1.0000  
 Recording Time: 2012-3-29 17:18 Sample Weight: 1.0000  
 Run Time (min): 34.93 Sample Amount: 1.0000

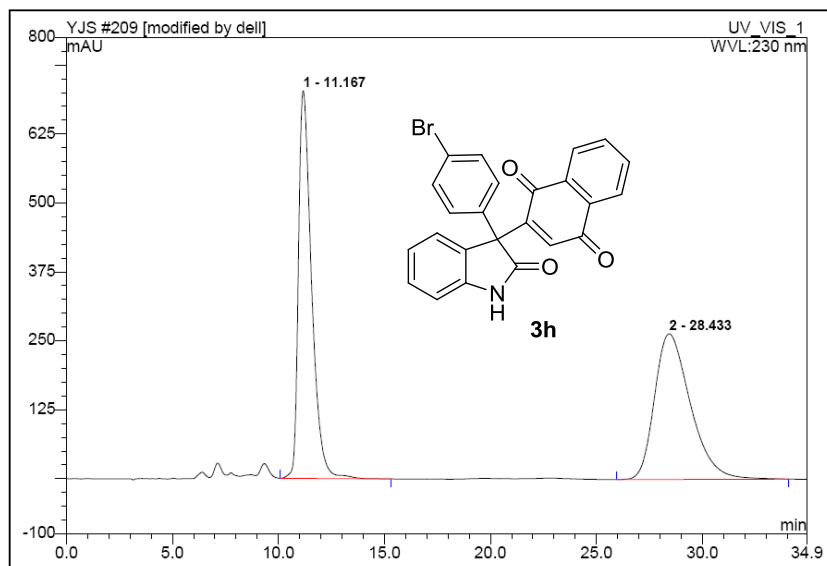

| No.    | Ret. Time<br>min | Peak Name | Height<br>mAU | Area<br>mAU*min | Rel. Area<br>% | Amount | Type |
|--------|------------------|-----------|---------------|-----------------|----------------|--------|------|
| 1      | 11.17            | n.a.      | 702.526       | 504.446         | 49.31          | n.a.   | BMB  |
| 2      | 28.43            | n.a.      | 263.898       | 518.543         | 50.69          | n.a.   | BMB  |
| Total: |                  |           | 966.424       | 1022.989        | 100.00         | 0.000  |      |

**328 YJS-YC-76-ODH-ASY-80/20-230-1.0-1**

Sample Name: YJS-YC-76-ODH-ASY-80/20-230-1.0-1 Injection Volume: 20.0  
 Vial Number: 656 Channel: UV\_VIS\_1  
 Sample Type: standard Wavelength: 230  
 Control Program: YJS Bandwidth: n.a.  
 Quantif. Method: YJS Dilution Factor: 1.0000  
 Recording Time: 2012-5-16 18:27 Sample Weight: 1.0000  
 Run Time (min): 36.33 Sample Amount: 1.0000

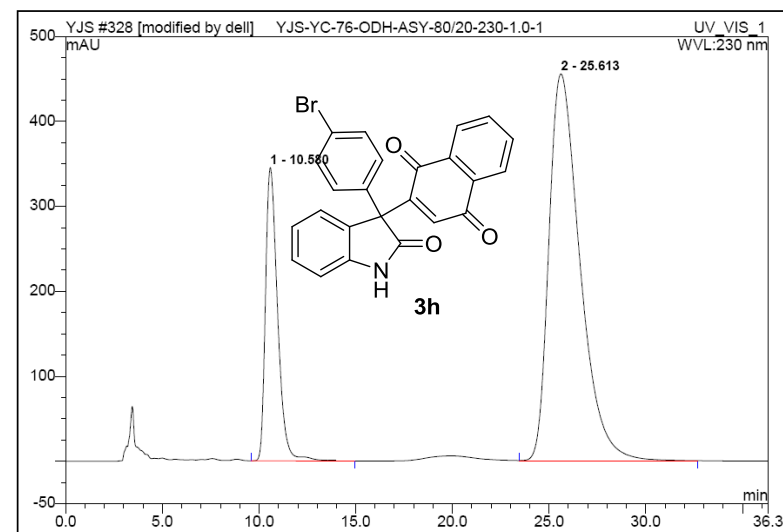

| No.    | Ret. Time<br>min | Peak Name | Height<br>mAU | Area<br>mAU*min | Rel. Area<br>% | Amount | Type |
|--------|------------------|-----------|---------------|-----------------|----------------|--------|------|
| 1      | 10.58            | n.a.      | 345.204       | 250.432         | 22.85          | n.a.   | BMB  |
| 2      | 25.61            | n.a.      | 455.192       | 845.496         | 77.15          | n.a.   | BMB* |
| Total: |                  |           | 800.395       | 1095.927        | 100.00         | 0.000  |      |

**212 YJS-YB-133-4-RAC-ODH-80/20-230-1.0-1**

Sample Name: YJS-YB-133-4-RAC-ODH-80/20-230-1.0-1 Injection Volume: 20.0  
 Vial Number: 537 Channel: UV\_VIS\_1  
 Sample Type: standard Wavelength: 230  
 Control Program: YJS Bandwidth: n.a.  
 Quantif. Method: YJS Dilution Factor: 1.0000  
 Recording Time: 2012-3-29 19:03 Sample Weight: 1.0000  
 Run Time (min): 21.37 Sample Amount: 1.0000

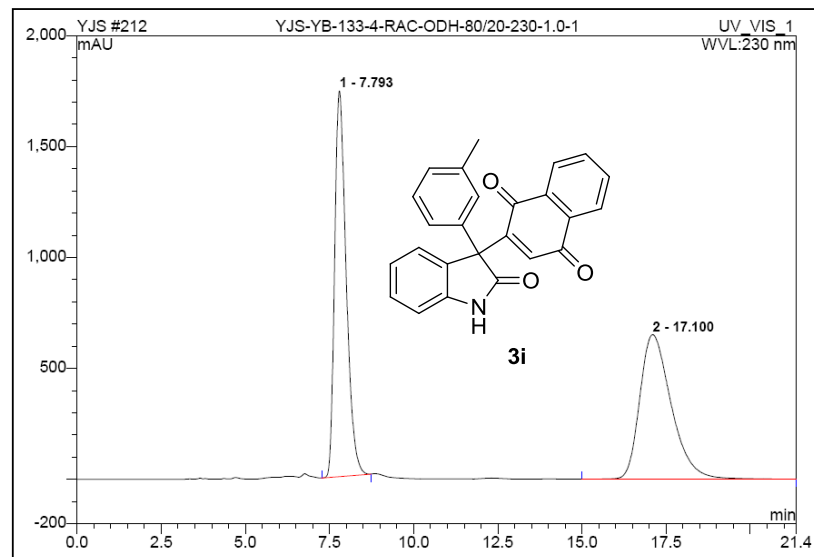

| No.    | Ret.Time<br>min | Peak Name | Height<br>mAU | Area<br>mAU*min | Rel.Area<br>% | Amount | Type |
|--------|-----------------|-----------|---------------|-----------------|---------------|--------|------|
| 1      | 7.79            | n.a.      | 1738.515      | 691.397         | 49.47         | n.a.   | BMB  |
| 2      | 17.10           | n.a.      | 651.589       | 706.187         | 50.53         | n.a.   | BMB  |
| Total: |                 |           | 2390.104      | 1397.584        | 100.00        | 0.000  |      |

**305 YJS-YC-55-5-ODH-ASY-80/20-230-1.0-1**

Sample Name: YJS-YC-55-5-ODH-ASY-80/20-230-1.0-1 Injection Volume: 20.0  
 Vial Number: 633 Channel: UV\_VIS\_1  
 Sample Type: standard Wavelength: 230  
 Control Program: YJS Bandwidth: n.a.  
 Quantif. Method: YJS Dilution Factor: 1.0000  
 Recording Time: 2012-5-4 21:00 Sample Weight: 1.0000  
 Run Time (min): 26.26 Sample Amount: 1.0000

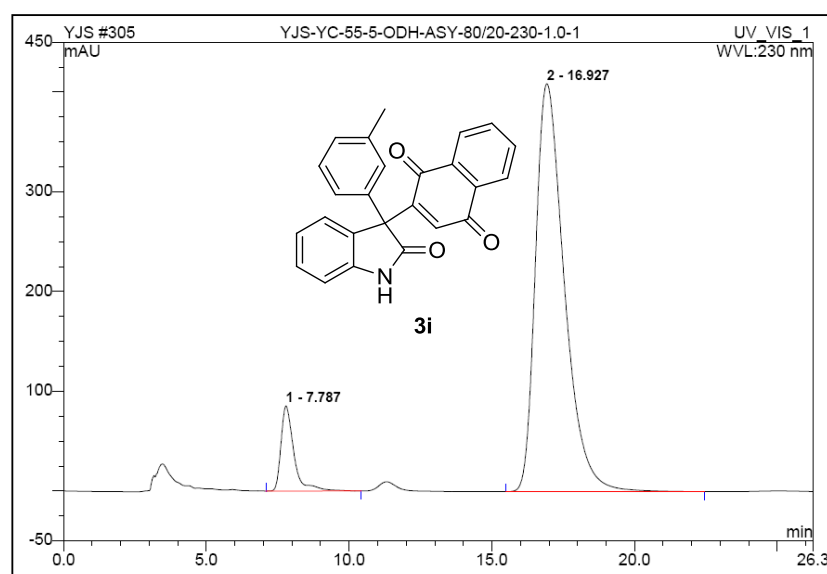

| No.    | Ret.Time<br>min | Peak Name | Height<br>mAU | Area<br>mAU*min | Rel.Area<br>% | Amount | Type |
|--------|-----------------|-----------|---------------|-----------------|---------------|--------|------|
| 1      | 7.79            | n.a.      | 85.315        | 44.982          | 8.58          | n.a.   | BMB  |
| 2      | 16.93           | n.a.      | 409.129       | 479.318         | 91.42         | n.a.   | BMB  |
| Total: |                 |           | 494.444       | 524.300         | 100.00        | 0.000  |      |

**343 yjs-yC-47-ODH-rac-80/20-254-1.0-1**

|                  |                                   |                   |          |
|------------------|-----------------------------------|-------------------|----------|
| Sample Name:     | yjs-yC-47-ODH-rac-80/20-254-1.0-1 | Injection Volume: | 20.0     |
| Vial Number:     | 672                               | Channel:          | UV_VIS_1 |
| Sample Type:     | standard                          | Wavelength:       | 254      |
| Control Program: | YJS                               | Bandwidth:        | n.a.     |
| Quantif. Method: | YJS                               | Dilution Factor:  | 1.0000   |
| Recording Time:  | 2012-5-23 15:39                   | Sample Weight:    | 1.0000   |
| Run Time (min):  | 44.36                             | Sample Amount:    | 1.0000   |

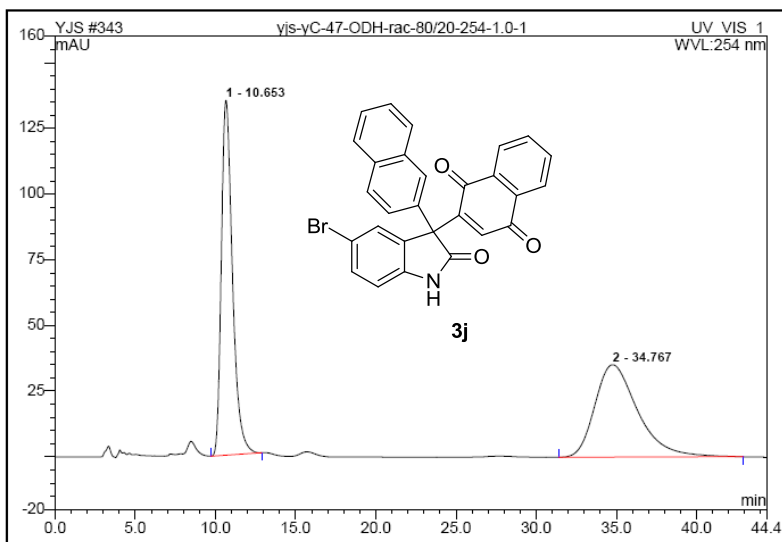

| No.    | Ret. Time<br>min | Peak Name | Height<br>mAU | Area<br>mAU*min | Rel. Area<br>% | Amount | Type |
|--------|------------------|-----------|---------------|-----------------|----------------|--------|------|
| 1      | 10.65            | n.a.      | 134.990       | 108.542         | 49.89          | n.a.   | BMB  |
| 2      | 34.77            | n.a.      | 35.176        | 109.001         | 50.11          | n.a.   | BMB  |
| Total: |                  |           | 170.166       | 217.543         | 100.00         | 0.000  |      |

**323 YJS-YC-71-ODH-ASY-80/20-254-1.0-1**

|                  |                                   |                   |          |
|------------------|-----------------------------------|-------------------|----------|
| Sample Name:     | YJS-YC-71-ODH-ASY-80/20-254-1.0-1 | Injection Volume: | 20.0     |
| Vial Number:     | 651                               | Channel:          | UV_VIS_1 |
| Sample Type:     | standard                          | Wavelength:       | 254      |
| Control Program: | YJS                               | Bandwidth:        | n.a.     |
| Quantif. Method: | YJS                               | Dilution Factor:  | 1.0000   |
| Recording Time:  | 2012-5-12 18:58                   | Sample Weight:    | 1.0000   |
| Run Time (min):  | 50.00                             | Sample Amount:    | 1.0000   |

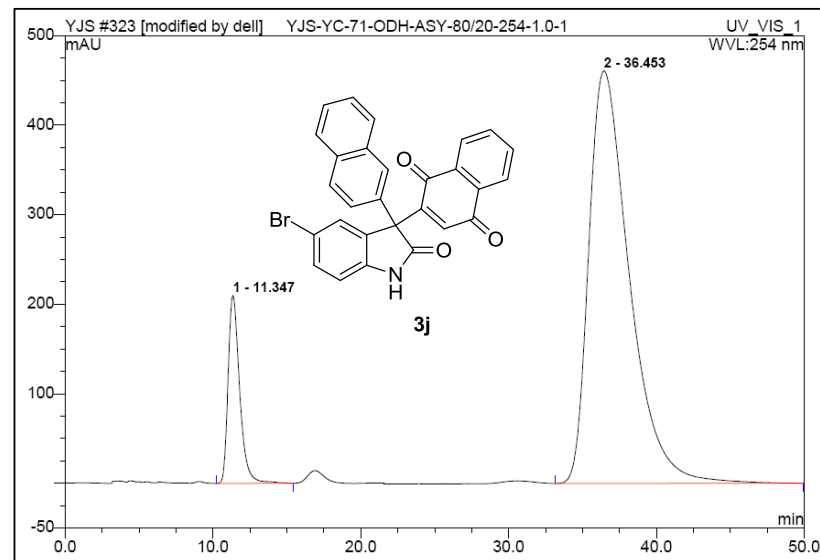

| No.    | Ret. Time<br>min | Peak Name | Height<br>mAU | Area<br>mAU*min | Rel. Area<br>% | Amount | Type |
|--------|------------------|-----------|---------------|-----------------|----------------|--------|------|
| 1      | 11.35            | n.a.      | 209.865       | 190.384         | 11.51          | n.a.   | BMB  |
| 2      | 36.45            | n.a.      | 460.936       | 1464.031        | 88.49          | n.a.   | BMB  |
| Total: |                  |           | 670.801       | 1654.415        | 100.00         | 0.000  |      |

**342 yjs-yB-139-4-ODH-rac-80/20-254-1.0-1**

|                  |                                      |                   |          |
|------------------|--------------------------------------|-------------------|----------|
| Sample Name:     | yjs-yB-139-4-ODH-rac-80/20-254-1.0-1 | Injection Volume: | 20.0     |
| Vial Number:     | 671                                  | Channel:          | UV_VIS_1 |
| Sample Type:     | standard                             | Wavelength:       | 254      |
| Control Program: | YJS                                  | Bandwidth:        | n.a.     |
| Quantif. Method: | YJS                                  | Dilution Factor:  | 1.0000   |
| Recording Time:  | 2012-5-23 15:04                      | Sample Weight:    | 1.0000   |
| Run Time (min):  | 33.77                                | Sample Amount:    | 1.0000   |

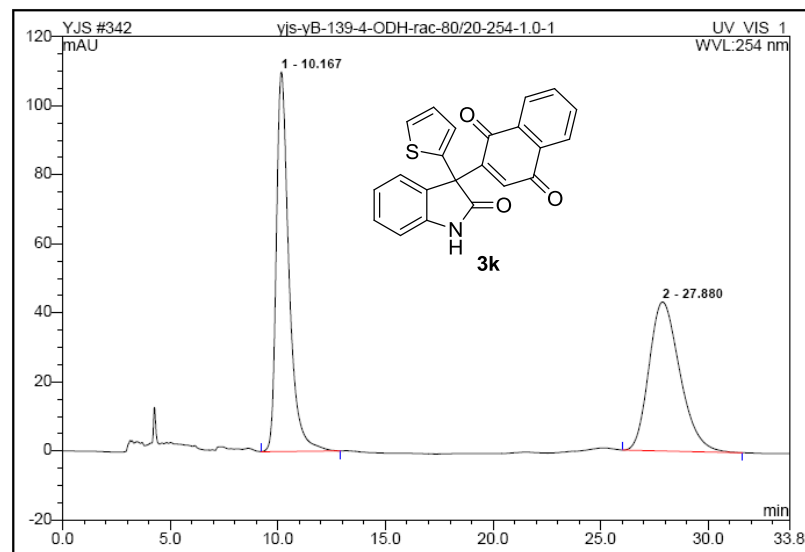

| No.    | Ret. Time<br>min | Peak Name | Height<br>mAU | Area<br>mAU*min | Rel. Area<br>% | Amount | Type |
|--------|------------------|-----------|---------------|-----------------|----------------|--------|------|
| 1      | 10.17            | n.a.      | 109.987       | 75.067          | 51.07          | n.a.   | BMB  |
| 2      | 27.88            | n.a.      | 43.178        | 71.918          | 48.93          | n.a.   | BMB  |
| Total: |                  |           | 153.165       | 146.986         | 100.00         | 0.000  |      |

**313 YJS-YC-55-3-ODH-ASY-80/20-254-1.0-1**

|                  |                                     |                   |          |
|------------------|-------------------------------------|-------------------|----------|
| Sample Name:     | YJS-YC-55-3-ODH-ASY-80/20-254-1.0-1 | Injection Volume: | 20.0     |
| Vial Number:     | 641                                 | Channel:          | UV_VIS_1 |
| Sample Type:     | standard                            | Wavelength:       | 254      |
| Control Program: | YJS                                 | Bandwidth:        | n.a.     |
| Quantif. Method: | YJS                                 | Dilution Factor:  | 1.0000   |
| Recording Time:  | 2012-5-9 11:35                      | Sample Weight:    | 1.0000   |
| Run Time (min):  | 33.71                               | Sample Amount:    | 1.0000   |

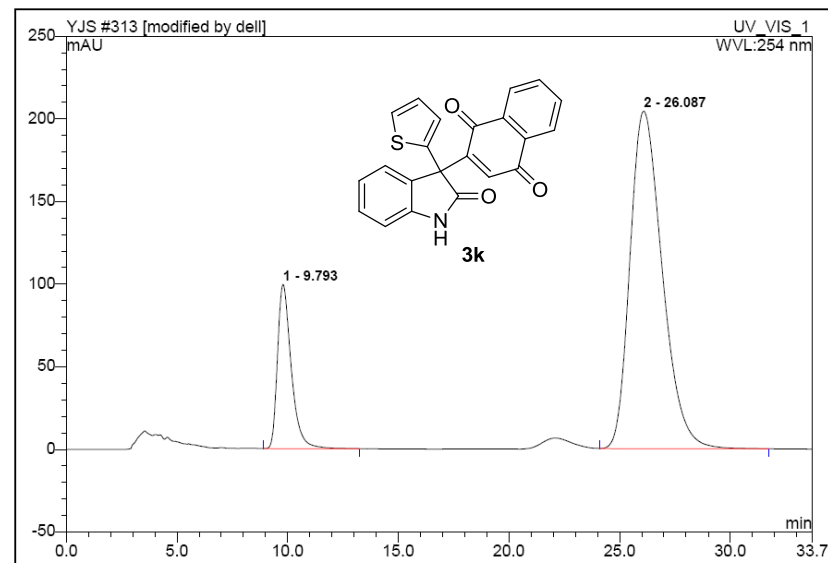

| No.    | Ret. Time<br>min | Peak Name | Height<br>mAU | Area<br>mAU*min | Rel. Area<br>% | Amount | Type |
|--------|------------------|-----------|---------------|-----------------|----------------|--------|------|
| 1      | 9.79             | n.a.      | 99.394        | 71.860          | 17.24          | n.a.   | BMB  |
| 2      | 26.09            | n.a.      | 204.189       | 344.946         | 82.76          | n.a.   | BMB* |
| Total: |                  |           | 303.583       | 416.806         | 100.00         | 0.000  |      |

**330 YJS-YB-135-1-ODH-RAC-80/20-254-1.0-1**

|                  |                                      |                   |          |
|------------------|--------------------------------------|-------------------|----------|
| Sample Name:     | YJS-YB-135-1-ODH-RAC-80/20-254-1.0-1 | Injection Volume: | 20.0     |
| Vial Number:     | 658                                  | Channel:          | UV_VIS_1 |
| Sample Type:     | standard                             | Wavelength:       | 254      |
| Control Program: | YJS                                  | Bandwidth:        | n.a.     |
| Quantif. Method: | YJS                                  | Dilution Factor:  | 1.0000   |
| Recording Time:  | 2012-5-16 19:34                      | Sample Weight:    | 1.0000   |
| Run Time (min):  | 17.63                                | Sample Amount:    | 1.0000   |

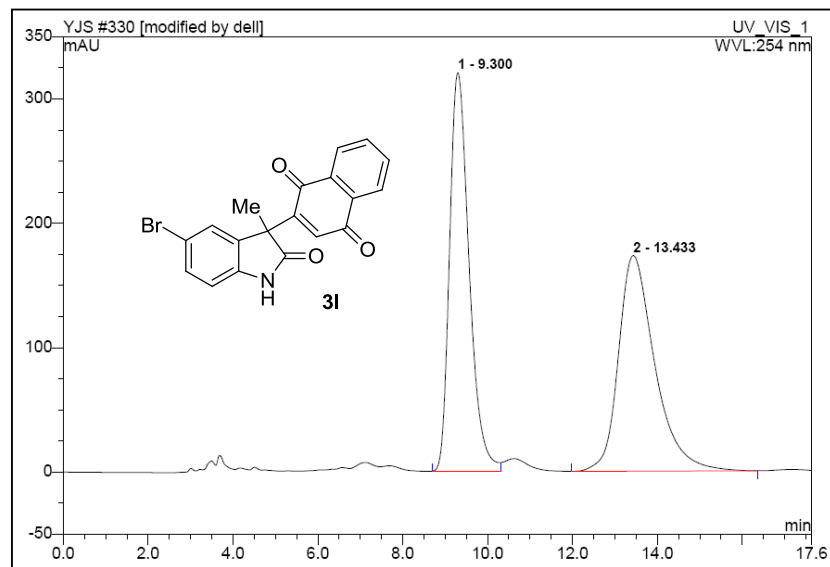

| No.    | Ret.Time<br>min | Peak Name | Height<br>mAU | Area<br>mAU*min | Rel.Area<br>% | Amount | Type |
|--------|-----------------|-----------|---------------|-----------------|---------------|--------|------|
| 1      | 9.30            | n.a.      | 320.300       | 170.772         | 49.78         | n.a.   | BM * |
| 2      | 13.43           | n.a.      | 173.333       | 172.288         | 50.22         | n.a.   | BMB  |
| Total: |                 |           | 493.633       | 343.060         | 100.00        | 0.000  |      |

**329 YJS-YC-77-ODH-ASY-80/20-254-1.0-1**

|                  |                                   |                   |          |
|------------------|-----------------------------------|-------------------|----------|
| Sample Name:     | YJS-YC-77-ODH-ASY-80/20-254-1.0-1 | Injection Volume: | 20.0     |
| Vial Number:     | 657                               | Channel:          | UV_VIS_1 |
| Sample Type:     | standard                          | Wavelength:       | 254      |
| Control Program: | YJS                               | Bandwidth:        | n.a.     |
| Quantif. Method: | YJS                               | Dilution Factor:  | 1.0000   |
| Recording Time:  | 2012-5-16 19:15                   | Sample Weight:    | 1.0000   |
| Run Time (min):  | 18.90                             | Sample Amount:    | 1.0000   |

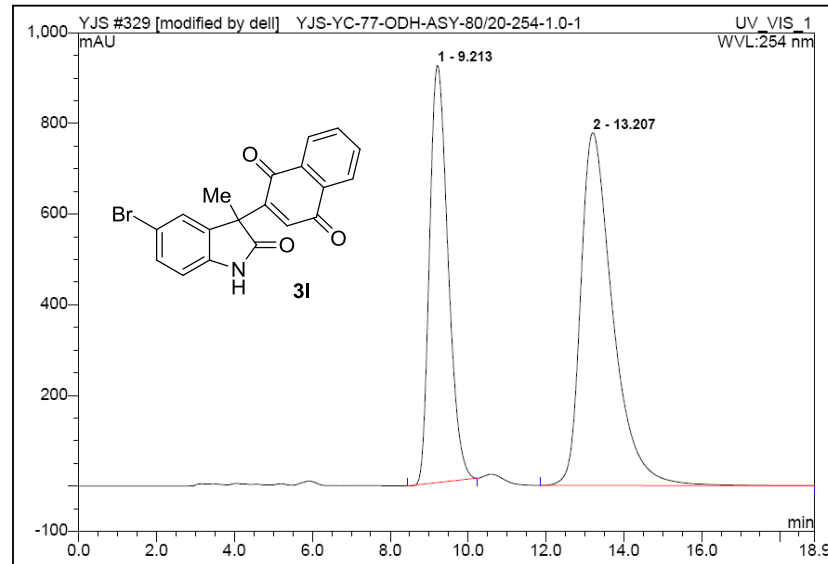

| No.    | Ret.Time<br>min | Peak Name | Height<br>mAU | Area<br>mAU*min | Rel.Area<br>% | Amount | Type |
|--------|-----------------|-----------|---------------|-----------------|---------------|--------|------|
| 1      | 9.21            | n.a.      | 920.491       | 505.019         | 40.54         | n.a.   | BMB* |
| 2      | 13.21           | n.a.      | 778.373       | 740.628         | 59.46         | n.a.   | BMB* |
| Total: |                 |           | 1698.864      | 1245.647        | 100.00        | 0.000  |      |

Operator: dell Timebase: U-3000 Sequence: YJS

P:  
2012-5-26 6:

### 348 yjs-yc-87-OZH-RAC-90/10-230-1.0-1

Sample Name: yjs-yc-87-OZH-RAC-90/10-230-1.0-1 Injection Volume: 20.0  
Vial Number: 677 Channel: UV\_VIS\_1  
Sample Type: standard Wavelength: 230  
Control Program: YJS Bandwidth: n.a.  
Quantif. Method: YJS Dilution Factor: 1.0000  
Recording Time: 2012-5-26 17:29 Sample Weight: 1.0000  
Run Time (min): 35.15 Sample Amount: 1.0000

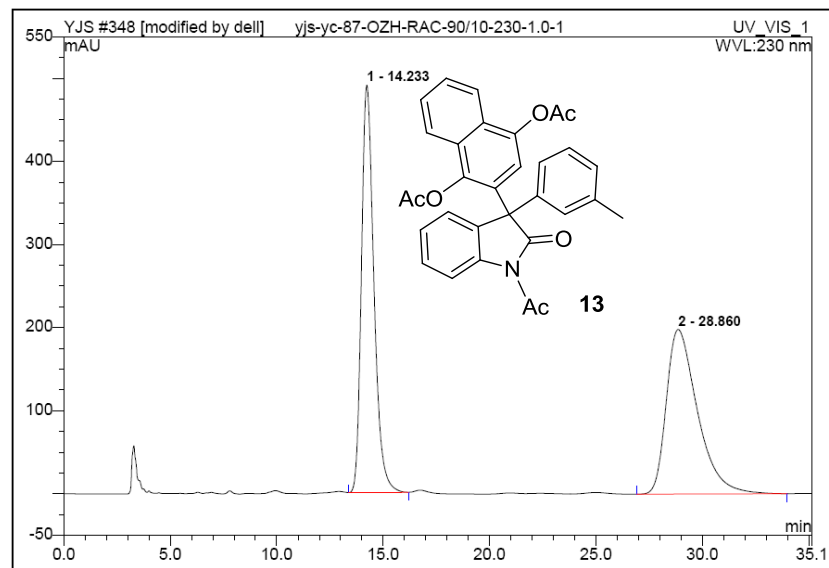

| No.    | Ret.Time<br>min | Peak Name | Height<br>mAU | Area<br>mAU*min | Rel.Area<br>% | Amount | Type |
|--------|-----------------|-----------|---------------|-----------------|---------------|--------|------|
| 1      | 14.23           | n.a.      | 490.423       | 332.720         | 49.78         | n.a.   | BMB  |
| 2      | 28.86           | n.a.      | 198.103       | 335.603         | 50.22         | n.a.   | BMB  |
| Total: |                 |           | 688.526       | 668.323         | 100.00        | 0.000  |      |

Operator: dell Timebase: U-3000 Sequence: YJS

P:  
2012-5-26 4:

### 346 yjs-yc-92-OZH-asy-90/10-230-1.0-1

Sample Name: yjs-yc-92-OZH-asy-90/10-230-1.0-1 Injection Volume: 20.0  
Vial Number: 675 Channel: UV\_VIS\_1  
Sample Type: standard Wavelength: 230  
Control Program: YJS Bandwidth: n.a.  
Quantif. Method: YJS Dilution Factor: 1.0000  
Recording Time: 2012-5-26 16:14 Sample Weight: 1.0000  
Run Time (min): 37.45 Sample Amount: 1.0000

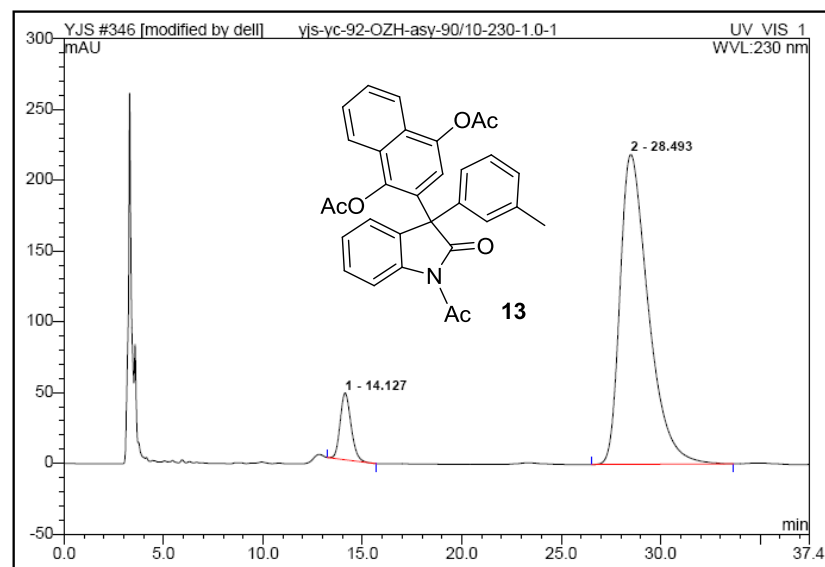

| No.    | Ret.Time<br>min | Peak Name | Height<br>mAU | Area<br>mAU*min | Rel.Area<br>% | Amount | Type |
|--------|-----------------|-----------|---------------|-----------------|---------------|--------|------|
| 1      | 14.13           | n.a.      | 47.106        | 29.798          | 7.62          | n.a.   | BMB* |
| 2      | 28.49           | n.a.      | 218.913       | 361.453         | 92.38         | n.a.   | BMB  |
| Total: |                 |           | 266.018       | 391.252         | 100.00        | 0.000  |      |

**348 yjs-yc-87-OZH-RAC-90/10-230-1.0-1**

|                  |                                   |                   |          |
|------------------|-----------------------------------|-------------------|----------|
| Sample Name:     | yjs-yc-87-OZH-RAC-90/10-230-1.0-1 | Injection Volume: | 20.0     |
| Vial Number:     | 677                               | Channel:          | UV_VIS_1 |
| Sample Type:     | standard                          | Wavelength:       | 230      |
| Control Program: | YJS                               | Bandwidth:        | n.a.     |
| Quantif. Method: | YJS                               | Dilution Factor:  | 1.0000   |
| Recording Time:  | 2012-5-26 17:29                   | Sample Weight:    | 1.0000   |
| Run Time (min):  | 35.15                             | Sample Amount:    | 1.0000   |

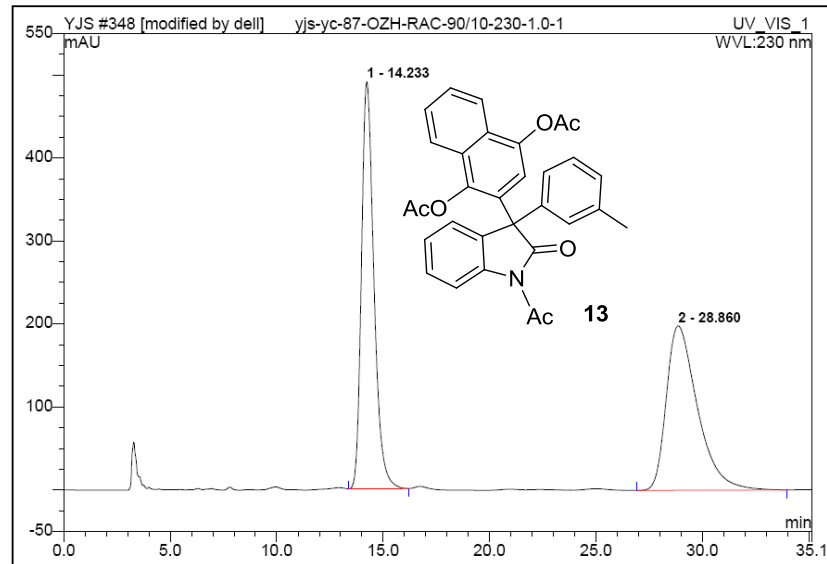

| No.    | Ret.Time<br>min | Peak Name | Height<br>mAU | Area<br>mAU*min | Rel.Area<br>% | Amount | Type |
|--------|-----------------|-----------|---------------|-----------------|---------------|--------|------|
| 1      | 14.23           | n.a.      | 490.423       | 332.720         | 49.78         | n.a.   | BMB  |
| 2      | 28.86           | n.a.      | 198.103       | 335.603         | 50.22         | n.a.   | BMB  |
| Total: |                 |           | 688.526       | 668.323         | 100.00        | 0.000  |      |

**347 yjs-yc-95-OZH-asy-90/10-230-1.0-1**

|                  |                                   |                   |          |
|------------------|-----------------------------------|-------------------|----------|
| Sample Name:     | yjs-yc-95-OZH-asy-90/10-230-1.0-1 | Injection Volume: | 20.0     |
| Vial Number:     | 676                               | Channel:          | UV_VIS_1 |
| Sample Type:     | standard                          | Wavelength:       | 230      |
| Control Program: | YJS                               | Bandwidth:        | n.a.     |
| Quantif. Method: | YJS                               | Dilution Factor:  | 1.0000   |
| Recording Time:  | 2012-5-26 16:52                   | Sample Weight:    | 1.0000   |
| Run Time (min):  | 36.45                             | Sample Amount:    | 1.0000   |

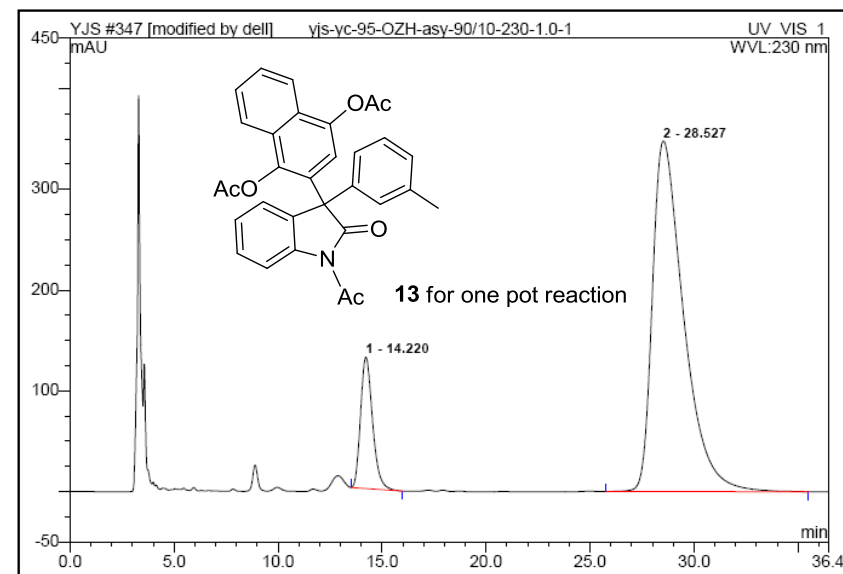

| No.    | Ret.Time<br>min | Peak Name | Height<br>mAU | Area<br>mAU*min | Rel.Area<br>% | Amount | Type |
|--------|-----------------|-----------|---------------|-----------------|---------------|--------|------|
| 1      | 14.22           | n.a.      | 130.305       | 87.144          | 12.56         | n.a.   | BMB  |
| 2      | 28.53           | n.a.      | 348.043       | 606.463         | 87.44         | n.a.   | BMB  |
| Total: |                 |           | 478.348       | 693.607         | 100.00        | 0.000  |      |

Operator: dell Timebase: U-3000 Sequence: YJS

P:  
2012-7-10 9:01

### 349 yjs-yc-134-RAC-80/20-254-1.0-1

|                  |                                |                   |          |
|------------------|--------------------------------|-------------------|----------|
| Sample Name:     | yjs-yc-134-RAC-80/20-254-1.0-1 | Injection Volume: | 20.0     |
| Vial Number:     | 678                            | Channel:          | UV_VIS_1 |
| Sample Type:     | standard                       | Wavelength:       | 254      |
| Control Program: | YJS                            | Bandwidth:        | n.a.     |
| Quantif. Method: | YJS                            | Dilution Factor:  | 1.0000   |
| Recording Time:  | 2012-7-3 9:22                  | Sample Weight:    | 1.0000   |
| Run Time (min):  | 13.83                          | Sample Amount:    | 1.0000   |

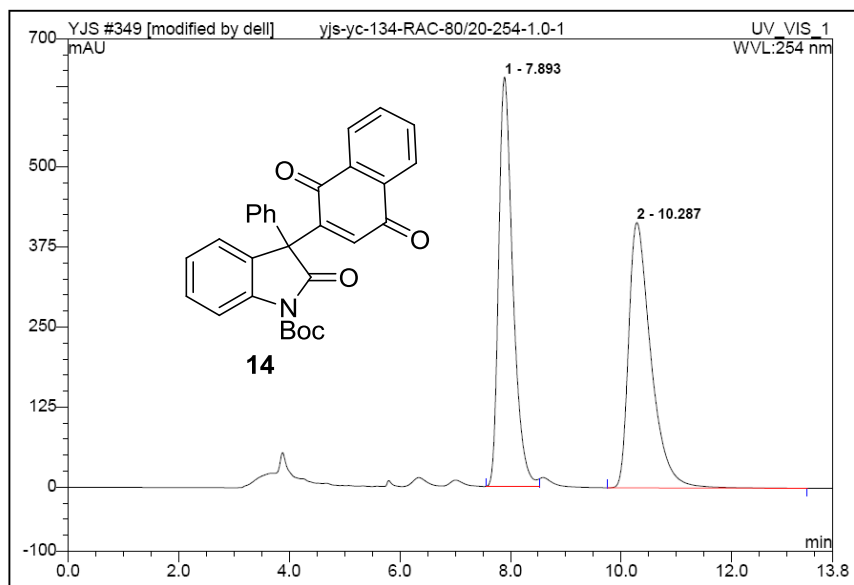

| No.    | Ret.Time<br>min | Peak Name | Height<br>mAU | Area<br>mAU*min | Rel.Area<br>% | Amount | Type |
|--------|-----------------|-----------|---------------|-----------------|---------------|--------|------|
| 1      | 7.89            | n.a.      | 638.883       | 190.198         | 49.64         | n.a.   | BM * |
| 2      | 10.29           | n.a.      | 413.984       | 192.940         | 50.36         | n.a.   | BMB  |
| Total: |                 |           | 1052.867      | 383.138         | 100.00        | 0.000  |      |

Operator: dell Timebase: U-3000 Sequence: YJS

P:  
2012-7-10 9:01

### 377 yjs-yc-144-IC-asy-80/20-254-1.0-1

|                  |                                   |                   |          |
|------------------|-----------------------------------|-------------------|----------|
| Sample Name:     | yjs-yc-144-IC-asy-80/20-254-1.0-1 | Injection Volume: | 20.0     |
| Vial Number:     | 708                               | Channel:          | UV_VIS_1 |
| Sample Type:     | standard                          | Wavelength:       | 254      |
| Control Program: | YJS                               | Bandwidth:        | n.a.     |
| Quantif. Method: | YJS                               | Dilution Factor:  | 1.0000   |
| Recording Time:  | 2012-7-9 22:35                    | Sample Weight:    | 1.0000   |
| Run Time (min):  | 14.51                             | Sample Amount:    | 1.0000   |

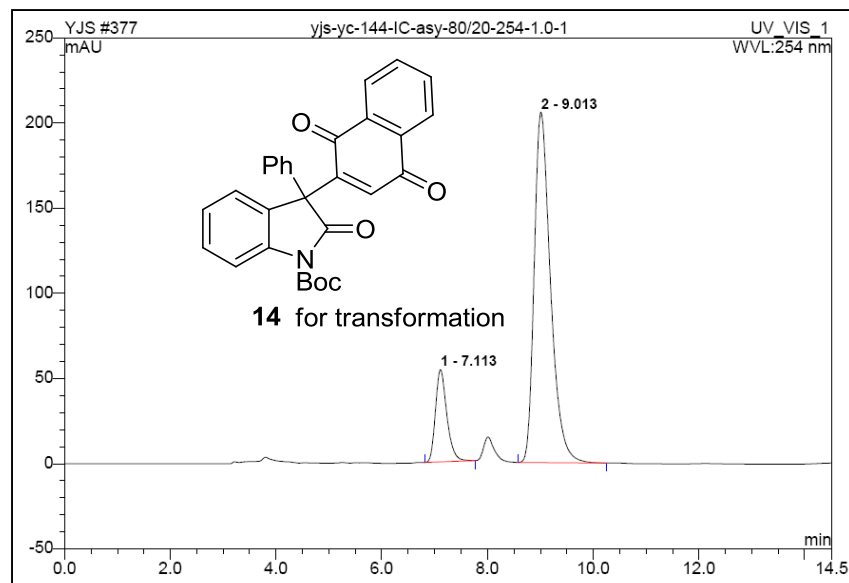

| No.    | Ret.Time<br>min | Peak Name | Height<br>mAU | Area<br>mAU*min | Rel.Area<br>% | Amount | Type |
|--------|-----------------|-----------|---------------|-----------------|---------------|--------|------|
| 1      | 7.11            | n.a.      | 54.076        | 13.494          | 15.50         | n.a.   | BMB  |
| 2      | 9.01            | n.a.      | 205.704       | 73.568          | 84.50         | n.a.   | BMB  |
| Total: |                 |           | 259.780       | 87.062          | 100.00        | 0.000  |      |



**349 yjs-yc-134-RAC-80/20-254-1.0-1**

|                  |                                |                   |          |
|------------------|--------------------------------|-------------------|----------|
| Sample Name:     | yjs-yc-134-RAC-80/20-254-1.0-1 | Injection Volume: | 20.0     |
| Vial Number:     | 678                            | Channel:          | UV_VIS_1 |
| Sample Type:     | standard                       | Wavelength:       | 254      |
| Control Program: | YJS                            | Bandwidth:        | n.a.     |
| Quantif. Method: | YJS                            | Dilution Factor:  | 1.0000   |
| Recording Time:  | 2012-7-3 9:22                  | Sample Weight:    | 1.0000   |
| Run Time (min):  | 13.83                          | Sample Amount:    | 1.0000   |

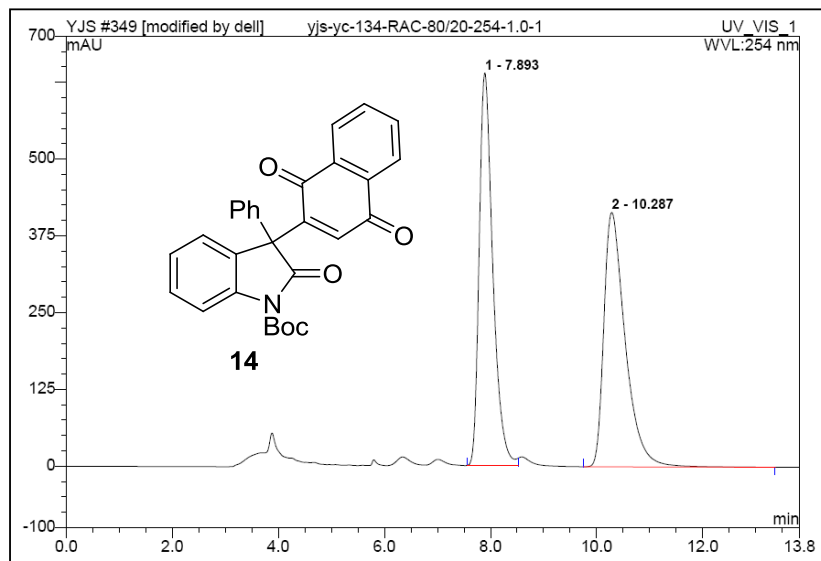

| No.    | Ret.Time<br>min | Peak Name | Height<br>mAU | Area<br>mAU*min | Rel.Area<br>% | Amount | Type |
|--------|-----------------|-----------|---------------|-----------------|---------------|--------|------|
| 1      | 7.89            | n.a.      | 638.883       | 190.198         | 49.64         | n.a.   | BM * |
| 2      | 10.29           | n.a.      | 413.984       | 192.940         | 50.36         | n.a.   | BMB  |
| Total: |                 |           | 1052.867      | 383.138         | 100.00        | 0.000  |      |

**350 yjs-yc-132-IC-asy-80/20-254-1.0-1**

|                  |                                   |                   |          |
|------------------|-----------------------------------|-------------------|----------|
| Sample Name:     | yjs-yc-132-IC-asy-80/20-254-1.0-1 | Injection Volume: | 20.0     |
| Vial Number:     | 679                               | Channel:          | UV_VIS_1 |
| Sample Type:     | standard                          | Wavelength:       | 254      |
| Control Program: | YJS                               | Bandwidth:        | n.a.     |
| Quantif. Method: | YJS                               | Dilution Factor:  | 1.0000   |
| Recording Time:  | 2012-7-3 9:39                     | Sample Weight:    | 1.0000   |
| Run Time (min):  | 15.73                             | Sample Amount:    | 1.0000   |

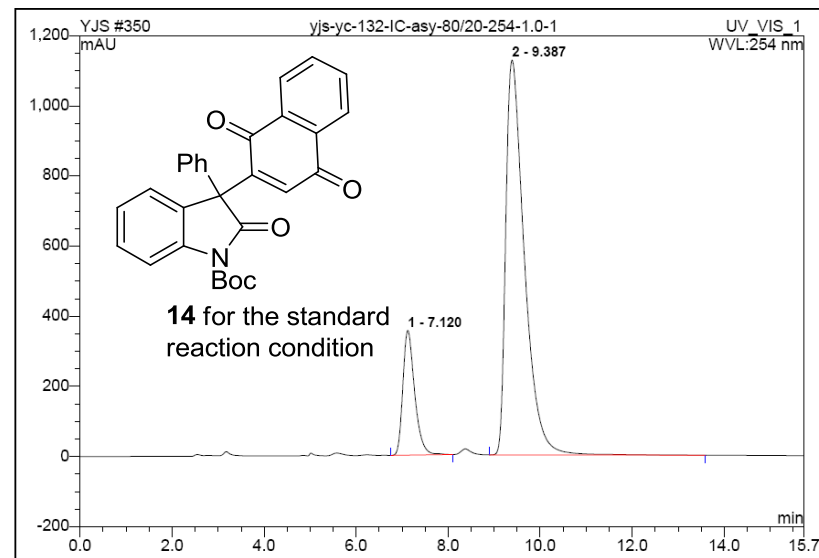

| No.    | Ret.Time<br>min | Peak Name | Height<br>mAU | Area<br>mAU*min | Rel.Area<br>% | Amount | Type |
|--------|-----------------|-----------|---------------|-----------------|---------------|--------|------|
| 1      | 7.12            | n.a.      | 355.559       | 105.542         | 16.70         | n.a.   | BMB  |
| 2      | 9.39            | n.a.      | 1125.482      | 526.379         | 83.30         | n.a.   | BMB  |
| Total: |                 |           | 1481.042      | 631.921         | 100.00        | 0.000  |      |
